# Supplementary material
Source: PubMed Central journal article supplement (PMC6953607)
Supplement: NIHMS1541051-supplement-1.pdf [file NIHMS1541051-supplement-1.pdf]

## Supplementary Information for

### **Implementation of permeation rules leads to a FabI inhibitor with activity against Gram-negative pathogens**

Erica N. Parker,<sup>1,4</sup> Bryon S. Drown,<sup>1,4</sup> Emily J. Geddes,<sup>1</sup> Hyang Yeon Lee,<sup>1</sup> Nahed Ismail,<sup>2</sup> Gee W. Lau,<sup>3</sup> and Paul J. Hergenrother<sup>1,\*</sup>

<sup>1</sup> Department of Chemistry and Carl R. Woese Institute for Genomic Biology, University of Illinois at Urbana-Champaign, 600 S. Mathews Avenue, Urbana, IL 61801, USA.

<sup>2</sup> Department of Pathology, College of Medicine, University of Illinois at Chicago, 840 South Wood Street, Chicago, IL 60612, USA.

<sup>3</sup> Department of Pathobiology, College of Veterinary Medicine, University of Illinois at Urbana-Champaign, 2001 South Lincoln Avenue, Urbana, IL 61802, USA.

<sup>4</sup> These authors contributed equally

\*Correspondence to: [hergenro@illinois.edu](mailto:hergenro@illinois.edu)

## Table of Contents

|                                                             |           |
|-------------------------------------------------------------|-----------|
| <b>1) Supplementary Table 1.....</b>                        | <b>2</b>  |
| <b>2) Supplementary Table 2.....</b>                        | <b>12</b> |
| <b>3) Supplementary Table 3.....</b>                        | <b>13</b> |
| <b>4) Supplementary Table 4.....</b>                        | <b>14</b> |
| <b>5) Supplementary Table 5.....</b>                        | <b>17</b> |
| <b>6) Supplementary Table 6.....</b>                        | <b>18</b> |
| <b>7) Materials and Methods for Chemical Synthesis.....</b> | <b>19</b> |

**Supplementary Table 1.** Structures and physicochemical properties of candidates for conversion. SMILES strings were generated using Open Babel with canonicalized atom order. If known, the target of each antibiotic was included. If available, PDB accession codes are included for co-crystal structures of antibiotic bound to protein target. \* indicates PDB accession for close analogue.

| Structure/name                                                                                         | Phase               | # RB | Glob  | SAR | Validated Target | X-ray structure             |
|--------------------------------------------------------------------------------------------------------|---------------------|------|-------|-----|------------------|-----------------------------|
| 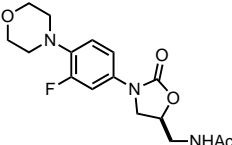 <p>linezolid</p>     | Approved            | 4    | 0.058 | Yes | 50S ribosome     | PDB: 3CPW, 3DLL, 4WFA       |
|  <p>pleuromutilin</p> | Approved            | 4    | 0.370 | Yes | 50S ribosome     | PDB: 1XBP, 2OGM, 2OGN, 2OGO |
|  <p>iclaprim</p>      | Approved            | 5    | 0.166 | Yes | DHFR             | PDB: 3FRA, 3FRF             |
|  <p>rifampin</p>      | Approved            | 5    | 0.367 | Yes | RNA polymerase   | PDB: 6CCV, 5UAC, 4KMU       |
|  <p>trimethoprim</p> | Approved            | 5    | 0.154 | Yes | DHFR             | PDB: 2W9H, 3FRE             |
|  <p>rifalazil</p>   | Phase 3, Terminated | 6    | 0.337 | Yes | RNA polymerase   | none                        |
|  <p>clindamycin</p> | Approved            | 7    | 0.157 | Yes | 50S ribosome     | PDB: 1JZX, 4V7V             |

\*structure of analog

| Structure/name                                                                                                          | Phase    | # RB | Glob  | SAR | Validated Target | X-ray structure |
|-------------------------------------------------------------------------------------------------------------------------|----------|------|-------|-----|------------------|-----------------|
| 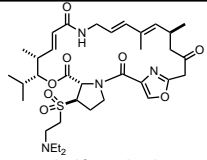<br><b>dalbavancin</b>                 | Approved | 7    | 0.384 | Yes | 50S ribosome     | PDB: 4U24, 4U26 |
| <br><b>erythromycin</b>                | Approved | 7    | 0.283 | Yes | 50S ribosome     | PDB: 4V7U       |
| <br><b>lincomycin</b>                  | Approved | 7    | 0.213 | Yes | 50S ribosome     | PDB: 5HKV       |
| <br><b>ranbezolid</b>                  | Phase 1  | 7    | 0.115 | Yes | 50S ribosome     | none            |
| <br><b>cethromycin</b>                 | Approved | 8    | 0.263 | Yes | 50S ribosome     | PDB: 1NWX       |
| <br><b>clarithromycin</b>            | Approved | 8    | 0.200 | Yes | 50S ribosome     | PDB: 1J5A       |
| <br><b>Modithromycin (EP-013420)</b> | Phase 1  | 8    | 0.204 |     |                  | none            |

\*structure of analog

| Structure/name                                                                                     | Phase    | # RB | Glob  | SAR | Validated Target | X-ray structure             |
|----------------------------------------------------------------------------------------------------|----------|------|-------|-----|------------------|-----------------------------|
| 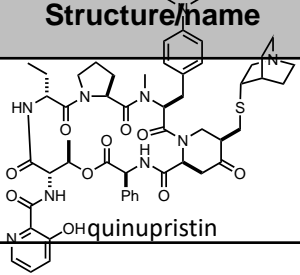<br>quinupristin   | Approved | 10   | 0.364 |     | 50S ribosome     | PDB: 1SM1, 1YJW, 4U1U, 4U26 |
| Structure not shown<br>telithromycin                                                               | Approved | 11   | 0.335 |     |                  | PDB: 4V7S, 4WF9             |
| <br>dirithromycin | Approved | 12   | 0.290 |     |                  | none                        |
| Structure not shown<br>roxithromycin                                                               | Approved | 13   | 0.280 | Yes | 50S ribosome     | PDB: 1JZZ                   |
| Structure not shown<br>vancomycin                                                                  | Approved | 13   | 0.281 | Yes | D-ala-D-ala      | PDB: 1FVM, 3RUN             |
| Structure not shown<br>oritavancin                                                                 | Approved | 19   | 0.299 | Yes | D-ala-D-ala      | none                        |
| Structure not shown<br>teicoplanin                                                                 | Approved | 19   | 0.287 |     | D-ala-D-ala      | none                        |

\*structure of analog

| Structure/name                                                                                     | Phase    | # RB | Glob  | SAR     | Validated Target | X-ray structure   |
|----------------------------------------------------------------------------------------------------|----------|------|-------|---------|------------------|-------------------|
| dalbavancin                                                                                        | Approved | 22   | 0.331 | Yes     | D-ala-D-ala      | PDB: 3RUL         |
| telavancin                                                                                         | Approved | 30   | 0.298 | Yes     | D-ala-D-ala      | none              |
| daptomycin                                                                                         | Approved | 35   | 0.380 | Limited | Cell membrane    | none              |
| 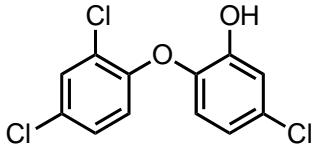<br>triclosan     | Approved | 2    | 0.069 | Yes     | FabI             | PDB: 1QSG, 4ALI   |
| <br>zoliflodacin | Phase 3  | 1    | 0.087 | Yes     | DNA gyrase       | PDB: 5CDM*        |
| <br>Debio 1452   | Phase 2  | 4    | 0.093 | Yes     | FabI             | PDB: 4JQC, 4FS3   |
| <br>gepotidacin | Phase 2  | 5    | 0.115 | Yes     | DNA gyrase       | PDB: 5IWI,* 2XCS* |

\*structure of analog

| Structure/name                                                                                               | Phase   | # RB | Glob  | SAR     | Validated Target | X-ray structure   |
|--------------------------------------------------------------------------------------------------------------|---------|------|-------|---------|------------------|-------------------|
| 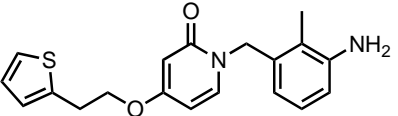<br>CG400549                | Phase 2 | 6    | 0.110 | Yes     | FabI             | PDB: 4CV1, 4CV2   |
| <br>CRS3123 (REP3123)       | Phase 1 | 6    | 0.307 | Yes     | MetRS            | PDB: 4ZT6,* 4ZT7* |
| <br>Delpazolid (LCB01-0371) | Phase 1 | 3    | 0.046 | Yes     | 50S ribosome     | none              |
| <br>lefamulin               | Phase 3 | 6    | 0.266 | Yes     | 50S ribosome     | PDB: 5HL7         |
| <br>MGB-BP-3               | Phase 1 | 10   | 0.145 | Limited | DNA minor groove | none              |
| <br>Contezolid (MRX-1)    | Phase 2 | 5    | 0.059 | Yes     | 50S ribosome     | none              |
| <br>PF-708093             | Phase 1 | 3    | 0.069 | Yes     | 50S ribosome     | none              |

\*structure of analog



| Structure/name                                                                                                      | Phase       | # RB | Glob  | SAR     | Validated Target                 | X-ray structure |
|---------------------------------------------------------------------------------------------------------------------|-------------|------|-------|---------|----------------------------------|-----------------|
| Not shown<br>ramoplanin                                                                                             | Phase 2     | 35   | 0.546 | No      | Lipid II                         | CSD: 729786     |
| 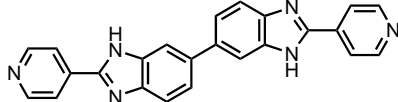<br>Ridinilazole (SMT19969)        | Phase 2     | 3    | 0.020 | No      | No                               | none            |
| <br>DNM                            | Preclinical | 0    | 0.024 | Yes     | Yes<br>DNA<br>gyrase             | none            |
| <br>cat MAP                        | Preclinical | 1    | 0.057 | Yes     | Methionine<br>aminopepti<br>dase | PDB: 3D27*      |
| <br>diaminoquinazoline antifolate | Preclinical | 2    | 0.118 | Yes     | Yes<br>DHFR                      | PDB: 4LAE       |
| <br>HA7                          | Preclinical | 2    | 0.021 | Yes     | Methionine<br>aminopepti<br>dase | PDB: 4A6W       |
| <br>imidazole LolCDE             | Preclinical | 3    | 0.088 | Limited | Yes<br>LolCDE                    | none            |

\*structure of analog

| Structure/name                                                                                           | Phase       | # RB | Glob  | SAR     | Validated Target | X-ray structure |
|----------------------------------------------------------------------------------------------------------|-------------|------|-------|---------|------------------|-----------------|
| 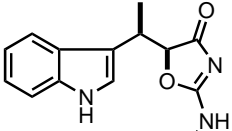 <p>indolmycin</p>      | Preclinical | 3    | 0.188 | Yes     | TrpRS            | PDB: 5DK4       |
|  <p>MRL-436</p>         | Preclinical | 4    | 0.171 | No      | RNAP             | none            |
|  <p>6-azaindazole</p>   | Preclinical | 5    | 0.042 | Limited | DNA ligase       | PDB: 4CC6*      |
|  <p>bayer phers</p>     | Preclinical | 5    | 0.136 | Yes     | PheRS            | PDB: 4P73       |
|  <p>indanol murC</p>   | Preclinical | 5    | 0.100 | Yes     | MurC             | none            |
|  <p>mckinney fabH</p> | Preclinical | 5    | 0.057 | Yes     | FabH             | PDB: 5BQS*      |
|  <p>moch AccC</p>     | Preclinical | 5    | 0.180 | Limited | AccC             | PDB: 2W6N*      |

\*structure of analog

| Structure/name                                                                                           | Phase       | # RB | Glob  | SAR     | Validated Target                 | X-ray structure |
|----------------------------------------------------------------------------------------------------------|-------------|------|-------|---------|----------------------------------|-----------------|
| 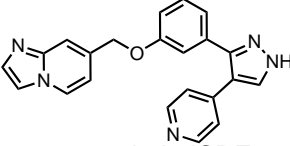 <p>pyrazole LoICDE</p> | Preclinical | 5    | 0.155 | Limited | LoICDE                           | No              |
|  <p>Ribocil-C</p>       | Preclinical | 5    | 0.193 | Limited | <i>ribA</i><br>riboswithc        | PDB: 5KX9       |
|  <p>UCP1106</p>         | Preclinical | 6    | 0.117 | Yes     | DHFR                             | PDB: 5IST       |
|  <p>nie FabH</p>        | Preclinical | 6    | 0.060 | Yes     | FabH                             | PDB: 3IL6*      |
|  <p>pep MAP</p>        | Preclinical | 6    | 0.174 | Yes     | Methionine<br>aminopepti<br>dase | PDB: 4Z7M*      |
|  <p>SCH71</p>         | Preclinical | 6    | 0.180 | Yes     | AccC                             | PDB: 3JZ1       |
|  <p>glychhol murC</p> | Preclinical | 7    | 0.095 | Yes     | MurC                             | none            |

\*structure of analog

| Structure/name                                                                                            | Phase       | # RB | Glob  | SAR     | Validated Target | X-ray structure |
|-----------------------------------------------------------------------------------------------------------|-------------|------|-------|---------|------------------|-----------------|
| 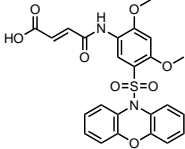 <p>sulfonamide GlmU</p> | Preclinical | 7    | 0.195 | Yes     | GlmU             | PDB: 4AC3       |
|  <p>zantrin Z3</p>       | Preclinical | 8    | 0.088 | Yes     | No               | none            |
|  <p>Pfizer AccC</p>      | Preclinical | 4    | 0.143 | Limited | Resistance       | PDB: 2J9G       |
|                                                                                                           |             |      |       |         |                  |                 |
|                                                                                                           |             |      |       |         |                  |                 |
|                                                                                                           |             |      |       |         |                  |                 |
|                                                                                                           |             |      |       |         |                  |                 |

\*structure of analog

**Supplementary Table 2.** Physiochemical properties of Debio-1452 and amine analogues. eNTRY rule guidelines (RBs, Globularity, Functional Group) were calculated using eNTRYway. For calculation of vsurf\_A, chemical structures were created and managed using Canvas (Version 2.6, Schrödinger, LLC). Initial structure preparation and 3D minimization was performed with LigPrep (Version 3.6, Schrödinger, LLC) using OPLS\_2005 force fields. Tautomeric and protonation states were determined using Epik (Version 3.4, Schrödinger, LLC) at pH 7.4 (*J. Comput. Aided Mol. Des.* **24**, 591-604 (2010); *J. Comput. Aided Mol. Des.* **21**, 681-691 (2007)). Generation of ensembles of conformations was performed using Conformational Search in MOE 2015.10 (*J. Chem. Inf. Model* **50**, 792-800 (2010)) using the LowModeMD method with default settings. The vsurf\_A value obtained for individual stereoisomers was then averaged.

| Compound       | Number of RBs | Globularity | Functional Group | Vsurf_A |
|----------------|---------------|-------------|------------------|---------|
| Debio-1452     | 4             | 0.093       | No Amine         | 6.44    |
| Debio-1452-NH3 | 4             | 0.061       | Primary Amine    | 6.73    |
| Compound 2     | 5             | 0.059       | Primary Amine    | 6.84    |
| Compound 3     | 6             | 0.082       | Primary Amine    | 6.43    |

**Supplementary Table 3.** Results from molecular docking of Debio-1452 derivatives into FabI. *S. aureus* FabI (PDB: 4FS3) was prepared as a receptor using Schrodinger Protein Prep Wizard. Ligands were prepared using LigPrep and docked using Glide XP (rigid receptor, flexible ligand). Amine-containing derivatives were docked as protonated forms. Top ranked poses were refined using MM-GBSA with Prime (VSGB solvation model, OPLS3e force field, flexibility allowed 5 Å around ligands with hierarchical sampling).

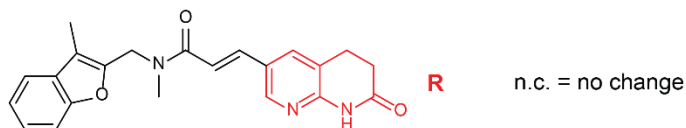

| Name           | R    | Docking Score (kcal/mol) |                  | MM-GBSA $\Delta\Delta G_{\text{bind}}$ (kcal/mol) |                  |
|----------------|------|--------------------------|------------------|---------------------------------------------------|------------------|
|                |      | <i>E.coli</i>            | <i>S. aureus</i> | <i>E.coli</i>                                     | <i>S. aureus</i> |
| Debio-1452     | n.c. | n.a.                     | n.a.             | 0                                                 | 0                |
| Debio-1452-NH3 |      | -15.25                   | -15.18           | -4.29                                             | -5.76            |
| 2              |      | -15.19                   | -14.84           | -3.11                                             | -1.50            |
| 3              |      | -14.59                   | -14.33           | -7.57                                             | -4.62            |

**Supplementary Table 4.** Antimicrobial susceptibility of clinical isolates to Debio-1452 and derivatives. The aqueous solubility limit of Debio-1452 prevents determining actual MIC values that are above 32 µg/mL. Compounds were evaluated against a panel of Gram-positive and Gram-negative organisms. MIC values were determined using the micro-dilution broth method as outlined by the Clinical and Laboratory Standards Institute (CLSI. *Methods for Dilution Antimicrobial Susceptibility Tests for Bacteria That Grow Aerobically*. 11th ed. CLSI standard M07. Wayne, PA: Clinical and Laboratory Standards Institute; 2018) and are listed in µg/mL. All experiments were performed in biological triplicate.

| Bacterial Strain                                    | MIC (µg/mL) |                |       |       |       |
|-----------------------------------------------------|-------------|----------------|-------|-------|-------|
|                                                     | Debio-1452  | Debio-1452-NH3 | 2     | 3     | 8     |
| <b>WT Gram-positive</b>                             |             |                |       |       |       |
| <i>S. aureus</i> ATCC 29213                         | 0.008-0.016 | 0.03           | 0.03  | 0.125 | 0.016 |
| <i>S. aureus</i> ATCC 29213<br>(+50% Human serum)   | 0.125       | 0.062          |       |       |       |
| <b>Gram-negative permeability mutant</b>            |             |                |       |       |       |
| <i>E. coli</i> $\Delta$ tolC JW5503                 | 0.031       | 0.062          | 0.125 | 0.062 | 0.125 |
| <i>E. coli</i> $\Delta$ rfaC JW3596                 | 0.5         | 0.25           | 0.5   | 0.5   | 0.25  |
| <b>WT Gram-negative</b>                             |             |                |       |       |       |
| <i>E. coli</i> MG1655                               | >32         | 4              | 8     | 8     | >32   |
| <i>E. coli</i> MG1655<br>(+ 4% Human serum albumin) | >32         | 16             |       |       |       |
| <i>E. coli</i> BAA-2340                             | >32         | 4              |       |       | >32   |
| <i>E. coli</i> BAA-2469                             | 4           | 2              | 2     |       |       |
| <i>E. coli</i> BAA-2471                             | 8           | 4              | 4     |       |       |
| <i>E. coli</i> F20987                               | >32         | 4              |       |       |       |
| <i>E. coli</i> M66623                               | >32         | 8              |       |       |       |
| <i>E. coli</i> AR-0048                              | >32         | 32             |       |       | >32   |
| <i>E. coli</i> AR-0058                              | 32          | 8              |       |       | >32   |
| <i>E. coli</i> AR-0085                              | >32         | 16             |       |       | >32   |
| <i>E. coli</i> AR-0114                              | >32         | 8              |       |       | >32   |
| <i>E. coli</i> AR-0137                              | >32         | 8              |       |       | >32   |
| <i>E. coli</i> AR-0151                              | >32         | 8              |       |       | >32   |
| <i>E. coli</i> AR-0162                              | >32         | 8              |       |       | >32   |
| <i>E. coli</i> AR-0346                              | >32         | 8              | 4     |       |       |
| <i>E. coli</i> AR-0349                              | 4           | 2              | 2     |       |       |
| <i>E. coli</i> AR-0493                              | >32         | 4              | 4     |       | >32   |
| <i>E. coli</i> AR-0495                              | 8           | 4              | 2     |       |       |
| <i>E. coli</i> AR-0541                              | >32         | 8              |       |       | >32   |

|                               |     |    |    |     |
|-------------------------------|-----|----|----|-----|
| <i>E. coli</i> AR-0543        | >32 | 8  |    | >32 |
| <i>E. coli</i> AR-0559        | 32  | 8  |    | >32 |
| <i>E. cloacae</i> ATCC 29893  | >32 | 8  |    | >32 |
| <i>E. cloacae</i> BAA-2341    | >32 | 8  | 16 |     |
| <i>E. cloacae</i> BAA-2468    | >32 | 8  | 8  |     |
| <i>E. cloacae</i> S28901.1    | >32 | 16 | 8  |     |
| <i>K. pneumoniae</i> AR-0034  | 16  | 8  |    | >32 |
| <i>K. pneumoniae</i> AR-0066  | >32 | 32 |    | >32 |
| <i>K. pneumoniae</i> AR-0098  | >32 | 32 |    | >32 |
| <i>K. pneumoniae</i> AR-0113  | >32 | 32 |    | >32 |
| <i>K. pneumoniae</i> AR-0139  | >32 | 16 |    | >32 |
| <i>K. pneumoniae</i> AR-0141  | >32 | 8  |    | >32 |
| <i>K. pneumoniae</i> AR-0347  | >32 | 16 | 8  |     |
| <i>K. pneumoniae</i> AR-0542  | >32 | 16 |    | >32 |
| <i>K. pneumoniae</i> AR-0548  | >32 | 32 |    | >32 |
| <i>K. pneumoniae</i> AR-0555  | >32 | 32 |    | >32 |
| <i>K. pneumoniae</i> AR-0560  | >32 | 32 |    | >32 |
| <i>K. pneumoniae</i> BAA-1705 | >32 | 8  | 16 |     |
| <i>K. pneumoniae</i> BAA-2342 | >32 | 16 | 16 |     |
| <i>K. pneumoniae</i> BAA-2470 | 8   | 4  | 4  |     |
| <i>K. pneumoniae</i> BAA-2472 | >32 | 16 | 16 |     |
| <i>K. pneumoniae</i> BAA-2473 | >32 | 16 | 16 |     |
| <i>K. pneumoniae</i> M14723   | >32 | 16 | 16 |     |
| <i>K. pneumoniae</i> M67198   | >32 | 32 | 32 |     |
| <i>K. pneumoniae</i> M67297   | >32 | 32 | 32 |     |
| <i>K. pneumoniae</i> S20595   | >32 | 16 | 16 |     |
| <i>K. pneumoniae</i> S47889   | >32 | 8  | 8  | >32 |
| <i>A. baumannii</i> AR-0033   | >32 | 32 |    | >32 |
| <i>A. baumannii</i> AR-0078   | >32 | 16 |    | >32 |
| <i>A. baumannii</i> AR-0083   | >32 | 16 |    | >32 |
| <i>A. baumannii</i> AR-0273   | >32 | 32 |    | >32 |
| <i>A. baumannii</i> AR-0278   | >32 | 32 |    | >32 |
| <i>A. baumannii</i> AR-0288   | >32 | 32 |    | >32 |
| <i>A. baumannii</i> AR-0299   | >32 | 32 |    | >32 |
| <i>A. baumannii</i> AR-0311   | 8   | 8  |    | >32 |
| <i>A. baumannii</i> AR-0312   | >32 | 16 |    | >32 |



|                             |     |     |     |     |
|-----------------------------|-----|-----|-----|-----|
| <i>A. baumannii</i> AR-0313 | >32 | 32  |     | >32 |
| <i>A. baumannii</i> W41979  | >32 | 4   | 16  | >32 |
| <i>A. baumannii</i> F19521  | >32 | 4   | 16  |     |
| <i>A. baumannii</i> KB304   | >32 | 64  | 64  |     |
| <i>A. baumannii</i> KB343   | >32 | 64  | >64 |     |
| <i>A. baumannii</i> KB357   | >32 | 64  | >64 |     |
| <i>A. baumannii</i> M13100  | >32 | 16  | 16  |     |
| <i>A. baumannii</i> WO22    | >32 | 64  | >64 |     |
| <i>P. aeruginosa</i> PA01   | >32 | >64 |     | >32 |

---

**Mammalian**

---

|                          |     |     |     |     |
|--------------------------|-----|-----|-----|-----|
| <i>H. sapiens</i> IMR-90 | 16% | 30% | 48% | 12% |
|--------------------------|-----|-----|-----|-----|

(% inhibition at 30  $\mu$ M)

|                                           |                |
|-------------------------------------------|----------------|
| <i>H. sapiens</i> IMR-90 IC <sub>50</sub> | 52.2 $\pm$ 3.6 |
|-------------------------------------------|----------------|

---

**Supplementary Table 5.** Antimicrobial susceptibility of triclosan to Debio-1452-NH3-resistant colonies. MIC values were determined using the micro-dilution broth method as outlined by the Clinical and Laboratory Standards Institute (<http://clsi.org/>) (CLSI. *Methods for Dilution Antimicrobial Susceptibility Tests for Bacteria That Grow Aerobically*. 11th ed. CLSI standard M07. Wayne, PA: Clinical and Laboratory Standards Institute; 2018) and are listed in  $\mu\text{g}/\text{mL}$ . All experiments were performed in biological triplicate.

| Bacterial Strain                        | MIC ( $\mu\text{g}/\text{mL}$ ) |                |
|-----------------------------------------|---------------------------------|----------------|
|                                         | Triclosan                       | Debio-1452-NH3 |
| <i>WT Gram-negative</i>                 |                                 |                |
| <i>E. coli</i> MG1655                   | 0.5                             | 4              |
| <i>Debio-1452-NH3 Resistant Strains</i> |                                 |                |
| <i>E. coli</i> MG1655 A116V colony 1    | 0.5                             | 64             |
| <i>E. coli</i> MG1655 A116V colony 5    | 0.5                             | 64             |
| <i>E. coli</i> MG1655 G148S colony 1    | 2                               | >64            |
| <i>E. coli</i> MG1655 G148S colony 2    | 2                               | >64            |

**Supplementary Table 6. Compound test set for calculation of eNTRyway accuracy.** The confusion matrix to calculate eNTRyway accuracy was generated by using eNTRyway to reanalyze the diverse compound collection published in reference 14 (Tables S2-S4 of reference 14; 188 compounds). The predicted results using eNTRyway for this compound test set was compared to experimental results published in reference 14 (Tables S2-S4 of reference 14; 188 compounds) for whole-cell accumulation in *E. coli*.

## Materials and Methods for Chemical Synthesis:

All reactions were performed under inert atmosphere using nitrogen gas unless otherwise specified. Chemical reagents were purchased from commercial sources and used without further purification. Debio-1452 used for *in vitro* and cell-based studies was purchased from MedChemExpress. Anhydrous solvents were either purchased from commercial suppliers or dried after being passed through columns packed with activated alumina under positive pressure of nitrogen using a PureSolv MD-5 (Inert, previously Innovative Technology Inc.) solvent purification system. Final compounds were dried in an Abderhalden drying pistol to remove any residual solvents.  $^1\text{H}$  NMR,  $^{13}\text{C}$  NMR, and 2D NMR experiments for prepared intermediates and products were recorded on a Varian Unity Inova 600 MHz NMR system equipped with an autoX broadband probe and/or a Bruker Avance III HD 500 MHz NMR system equipped with a CryoProbe. Spectra were obtained in the following solvents (reference peaks also included for  $^1\text{H}$  and  $^{13}\text{C}$  NMRs: Deuterated Chloroform-*d* ( $^1\text{H}$  NMR 7.26 ppm;  $^{13}\text{C}$  NMR 77.16 ppm), DMSO-*d*<sub>6</sub> ( $^1\text{H}$  NMR 2.50 ppm;  $^{13}\text{C}$  NMR 39.52 ppm) <sup>1</sup>. All the chemical shifts are expressed in ppm ( $\delta$ ), coupling constants ( $J$ , Hz) and peak patterns are reported as broad (br), singlet (s), doublet (d), triplet (t), quartet (q) and multiplet (m). High resolution mass spectra (HRMS) were obtained in the School of Chemical Sciences Mass Spectrometry Laboratory on a Waters Q-TOF Ultima quadrupole time of flight spectrometer using electrospray ionization ESI. Purity of the final compounds were purified to  $\geq 95\%$  as assessed by an Agilent Technologies 1290 Infinity II UHPLC equipped with a Phenomenex Kinetex column (2.1 mm ID x 50 mm, 1.7  $\mu\text{m}$  particle size, 100  $\text{\AA}$  pore size).

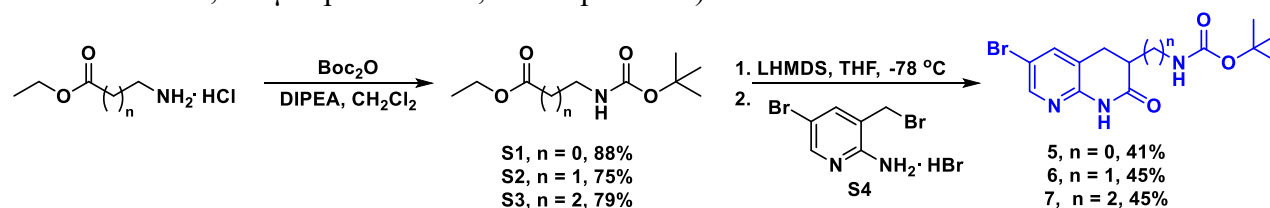

**Figure S1. Synthesis of Naphthyridinone Precursors and Debio-1452 Amine Containing Analogues**

Boc<sub>2</sub>O, di-*tert*-butyl dicarbonate; DIPEA, *N,N*-diisopropylethylamine ; LHMDS, lithium bis(trimethylsilyl)amide; THF, tetrahydrofuran

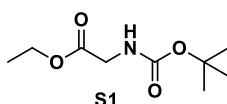

*ethyl (tert-butoxycarbonyl)glycinate (S1)*- *N,N*-diisopropylethylamine (2.2 eq, 44 mmol) was added dropwise to a solution of glycine ethyl ester hydrochloride (1 eq, 20 mmol) in  $\text{CH}_2\text{Cl}_2$  (80 mL) at 0 °C followed by the dropwise addition of di-*tert*-butyl dicarbonate (1.1 eq, 22 mmol). The reaction mixture was allowed to warm to room temperature and stirred for 1.5 h. The reaction was quenched with saturated aqueous ammonium chloride and extracted with dichloromethane. The combined organic extracts were washed with saturated aqueous sodium bicarbonate, dried over sodium sulfate, and concentrated under reduced pressure. Purification by flash purification column chromatography (10:40:50, EtOAc: $\text{CH}_2\text{Cl}_2$ :Hexanes) yielded ethyl (*tert*-butoxycarbonyl)glycinate (**S1**, 3.58 g, 17.6 mmol, 88%) as a colorless oil.

$^1\text{H}$  NMR (500 MHz, Chloroform-*d*):  $\delta$  5.00 (s, 1H), 4.21 (q,  $J = 7.1$  Hz, 2H), 3.90 (d,  $J = 5.6$  Hz, 2H), 1.45 (s, 9H), 1.28 (t,  $J = 7.2$  Hz, 3H).

$^{13}\text{C}$  NMR (126 MHz, Chloroform-*d*): 170.49, 155.83, 80.11, 61.48, 42.62, 28.47, 14.31.

Experimental information for the above compound has been previously reported <sup>2</sup>.

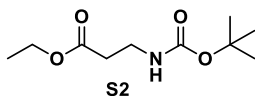

ethyl 3-((*tert*-butoxycarbonyl)amino)propanoate (**S2**)- *N,N*-diisopropylethylamine (2.2 eq, 44 mmol) was added dropwise to a solution of  $\beta$ -alanine ethyl ester hydrochloride (1 eq, 20 mmol) in  $\text{CH}_2\text{Cl}_2$  (80 mL) at 0 °C followed by the dropwise addition of di-*tert*-butyl dicarbonate (1.1 eq, 22 mmol). The reaction mixture was allowed to warm to room temperature and stirred for 1.5 h. The reaction was quenched with saturated aqueous ammonium chloride and extracted with dichloromethane. The combined organic extracts were washed with saturated aqueous sodium bicarbonate, dried over sodium sulfate, and concentrated under reduced pressure. Purification by flash purification column chromatography (10:40:50, EtOAc: $\text{CH}_2\text{Cl}_2$ :Hexanes) yielded ethyl 3-((*tert*-butoxycarbonyl)amino)propanoate (**S2**, 3.25 g, 15.0 mmol, 75%) as a colorless oil.

<sup>1</sup>H NMR (500 MHz, Chloroform-*d*):  $\delta$  5.01 (s, 1H), 4.15 (q,  $J = 7.2$  Hz, 2H), 3.48 – 3.27 (m, 2H), 2.51 (t,  $J = 6.1$  Hz, 2H), 1.43 (s, 9H), 1.26 (t,  $J = 7.1$  Hz, 3H).

<sup>13</sup>C NMR (126 MHz, Chloroform-*d*):  $\delta$  172.64, 155.92, 79.48, 60.78, 36.26, 34.81, 28.54, 14.35.

Experimental information for the above compound has been previously reported <sup>3</sup>.

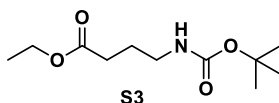

ethyl 4-((*tert*-butoxycarbonyl)amino)butanoate (**S3**)- *N,N*-diisopropylethylamine (2.2 eq, 44 mmol) was added dropwise to a solution of ethyl 4-aminobutyrate hydrochloride (1 eq, 20 mmol) in  $\text{CH}_2\text{Cl}_2$  (80 mL) at 0 °C followed by the dropwise addition of di-*tert*-butyl dicarbonate (1.1 eq, 22 mmol). The reaction mixture was allowed to warm to room temperature and stirred for 1.5 h. The reaction was quenched with saturated aqueous ammonium chloride and extracted with dichloromethane. The combined organic extracts were washed with saturated aqueous sodium bicarbonate, dried over sodium sulfate, and concentrated under reduced pressure. Purification by flash purification column chromatography (10:40:50, EtOAc: $\text{CH}_2\text{Cl}_2$ :Hexanes) yielded ethyl 4-((*tert*-butoxycarbonyl)amino)butanoate (**S3**, 3.66 g, 15.8 mmol, 79%) as a colorless oil.

<sup>1</sup>H NMR (500 MHz, Chloroform-*d*):  $\delta$  4.62 (s, 1H), 4.13 (q,  $J = 7.2$  Hz, 2H), 3.25 – 3.06 (m, 2H), 2.34 (t,  $J = 7.3$  Hz, 2H), 1.81 (p,  $J = 7.2$  Hz, 2H), 1.43 (s, 9H), 1.25 (t,  $J = 7.1$  Hz, 3H).

<sup>13</sup>C NMR (126 MHz, Chloroform-*d*):  $\delta$  173.42, 156.06, 79.34, 60.59, 40.11, 31.77, 28.55, 25.45, 14.37.

Experimental information for the above compound has been previously reported <sup>4</sup>.

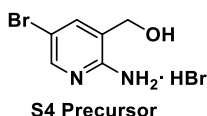

(2-amino-5-bromopyridin-3-yl)methanol hydrobromide (**S4 Precursor**)- Bromine (1.01 eq, 39.02 mmol) was added dropwise to a solution of 2-amino-3-(hydroxymethyl)pyridine (1 eq, 38.6 mmol) in glacial acetic acid (60 mL) cooled in an ice bath. After the addition of bromine was complete, the reaction mixture was returned to room temperature. After stirring overnight, the reaction mixture was filtered and washed several times with ether to yield (2-amino-5-bromopyridin-3-yl)methanol hydrobromide (**S4 Precursor**, 10.01 g, 35.5 mmol, 92% yield) as a yellow solid. (HBr Salt)

$^1\text{H NMR}$  (500 MHz, DMSO- $d_6$ ):  $\delta$  8.17 (d,  $J = 2.3$  Hz, 1H), 7.97 – 7.93 (m, 1H), 4.41 (s, 2H).

$^{13}\text{C NMR}$  (126 MHz, DMSO- $d_6$ ):  $\delta$  151.39, 141.11, 135.60, 127.72, 104.27, 57.98.

Experimental information for the above compound has been previously reported <sup>5</sup>.

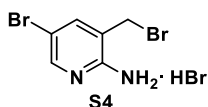

5-bromo-3-(bromomethyl)pyridin-2-amine hydrobromide (**S4**)-A suspension of (2-amino-5-bromopyridin-3-yl)methanol hydrobromide (1 eq, 35.47 mmol) in 48% hydrobromic acid (70 mL) was refluxed for 10 h. After 10 h, the reaction mixture was allowed to slowly cool to room with stirring, filtered, and rinsed with ethyl acetate. The solid was triturated with ethyl acetate to yield 5-bromo-3-(bromomethyl)pyridin-2-amine hydrobromide (**S4**, 10.226 g, 29.7 mmol, 84%) as a light beige solid.

$^1\text{H NMR}$  (500 MHz, DMSO- $d_6$ ):  $\delta$  8.18 (d,  $J = 2.4$  Hz, 1H), 8.15 (d,  $J = 2.4$  Hz, 1H), 4.72 (s, 2H).

$^{13}\text{C NMR}$  (126 MHz, DMSO):  $\delta$  153.04, 144.29, 141.01, 121.66, 104.11, 29.13.

Experimental information for the above compound has been previously reported <sup>5</sup>.

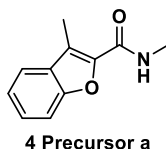

*N*,3-dimethylbenzofuran-2-carboxamide (**4 Precursor a**)-To a solution of 3-methylbenzo[b]furan-2-carboxylic acid (1 eq, 52 mmol), methylamine hydrochloride (1.1 eq, 57.52 mmol), *N,N*-diisopropylethylamine (2.2 eq, 114.4 mmol), and HOBt (1.1 eq, 57.52 mmol) in DMF (150 mL) was added EDC (1.1 eq, 57.52 mmol). The reaction mixture was heated to 70 °C overnight. The solvent was reduced to a few mL. The crude reaction mixture was diluted with CH<sub>2</sub>Cl<sub>2</sub> and washed with saturated aqueous sodium bicarbonate. The organic extracts were dried over sodium sulfate and concentrated under reduced pressure. Purification by flash column chromatography (**4 Precursor a**, 20:50:30, EtOAc:CH<sub>2</sub>Cl<sub>2</sub>:hexanes) yielded *N*,3-dimethylbenzofuran-2-carboxamide (9.24 g, 48.9 mmol, 94%) as a white solid.

$^1\text{H NMR}$  (500 MHz, Chloroform- $d$ ):  $\delta$  7.61 (dt,  $J = 7.8, 1.0$  Hz, 1H), 7.45 – 7.36 (m, 2H), 7.29 (ddd,  $J = 8.0, 6.4, 1.7$  Hz, 1H), 6.64 (s, 1H), 3.03 (d,  $J = 5.0$  Hz, 3H), 2.63 (s, 3H).

**<sup>13</sup>C NMR** (126 MHz, Chloroform-*d*):  $\delta$  161.10, 153.35, 142.96, 129.95, 127.04, 123.19, 122.19, 121.07, 111.55, 25.86, 9.00.

Experimental information for the above compound has been previously reported <sup>6</sup>.

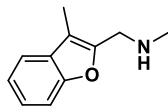

**4 Precursor b**

*N*-methyl-1-(3-methylbenzofuran-2-yl)methanamine (**4 Precursor b**)-Lithium aluminum hydride (3 eq, 47.6 mmol) was added portionwise to a solution of *N*,3-dimethylbenzofuran-2-carboxamide (1 eq, 15.86 mmol) in THF (75 mL) at room temperature. The reaction mixture was refluxed for 11 h. After reaction completion, the reaction mixture was cooled to 0 °C and slowly quenched by the sequential dropwise addition of 2 mL water, 2 mL 15% sodium hydroxide, 6 mL water at 15-30 min intervals. The mixture was filtered through a pad of celite rinsed several times with ethyl acetate. Purification by flash column chromatography (5:95, MeOH:CH<sub>2</sub>Cl<sub>2</sub>) yielded *N*-methyl-1-(3-methylbenzofuran-2-yl)methanamine (**4 Precursor b**, 2.513 g, 14.3 mmol, 91%).

**<sup>1</sup>H NMR** (500 MHz, Chloroform-*d*):  $\delta$  7.49 – 7.44 (m, 1H), 7.43 – 7.37 (m, 1H), 7.27 – 7.23 (m, 1H), 7.22 (td,  $J$  = 7.3, 1.3 Hz, 1H), 3.87 (s, 2H), 2.45 (s, 3H), 2.23 (s, 3H).

**<sup>13</sup>C NMR** (126 MHz, Chloroform-*d*):  $\delta$  154.25, 151.34, 130.08, 124.01, 122.26, 119.28, 112.33, 111.04, 46.23, 35.80, 8.07.

Experimental information for the above compound has been previously reported <sup>6</sup>.

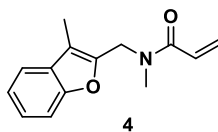

*N*-methyl-*N*-((3-methylbenzofuran-2-yl)methyl)acrylamide (**4**)- *N,N*-diisopropylethylamine (1.5 eq, 15.4 mmol) was added dropwise to a solution of *N*-methyl-1-(3-methylbenzofuran-2-yl)methanamine (1 eq, 10.3 mmol) in CH<sub>2</sub>Cl<sub>2</sub> (75 mL) at room temperature. After 10 min, acryloyl chloride (2 eq, 20.6 mmol) was added dropwise and the reaction mixture was stirred overnight. The solvent was removed under reduced pressure and purification by flash column chromatography (1:99 to 3:97, MeOH:CH<sub>2</sub>Cl<sub>2</sub>) yielded *N*-methyl-*N*-((3-methylbenzofuran-2-yl)methyl)acrylamide (**4**, 1.861 g, 8.12 mmol, 79%) as a colorless oil.

**Note:** Tabulated NMR data for acrylamide derivatives consist of two rotamers that exist at room temperature in a ratio of 35:65 and is reflected in the reported integral values.

**<sup>1</sup>H NMR** (500 MHz, Chloroform-*d*): 7.51 – 7.45 (m, 1H), 7.43 – 7.36 (m, 1H), 7.32 – 7.18 (m, 2H), 6.85 (dd,  $J$  = 16.8, 10.6 Hz, 0.35H), 6.59 (dd,  $J$  = 16.7, 10.4 Hz, 0.65H), 6.42 – 6.33 (m, 1H), 5.80 – 5.67 (m, 1H), 4.77 (s, 1.3H), 4.62 (s, 0.7H), 3.13 (s, 1.95H), 3.02 (s, 1.05H), 2.29 (s, 1.95H), 2.25 (s, 1.05H).

**Note:** Tabulated NMR data for acrylamide derivatives consist of two rotamers that exist at room temperature which results in doubling of signals for most <sup>13</sup>C nuclei.

<sup>13</sup>C NMR (126 MHz, Chloroform-*d*): 167.07, 166.29, 154.26, 154.23, 148.93, 147.52, 129.84, 129.48, 128.48, 128.22, 128.04, 127.54, 124.75, 124.30, 122.59, 122.37, 119.49, 113.74, 113.36, 111.20, 111.07, 45.21, 42.26, 35.36, 33.64, 7.95.

Experimental information for the above compound has been previously reported <sup>7</sup>.

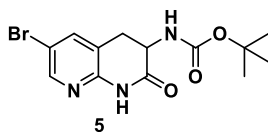

*tert*-butyl (6-bromo-2-oxo-1,2,3,4-tetrahydro-1,8-naphthyridin-3-yl)carbamate (**5**). To a solution of LHMDS (1 M in THF, 4 eq, 33.4 mmol) cooled to -78 °C was added a solution of ethyl (*tert*-butoxycarbonyl)glycinate (**S1**, 2 eq, 16.72 mmol) in THF (34 mL) dropwise. The reaction mixture was stirred for 1 h followed by the portionwise addition (3 portions at 15 min intervals) of 5-bromo-3-(bromomethyl)pyridin-2-amine hydrobromide (**S4**, 1 eq, 8.36 mmol) via a solid addition tube kept under N<sub>2</sub>. The reaction mixture was kept at -78 °C for several hours and allowed to warm to -40 °C overnight. The reaction mixture was quenched with 0.5M HCl (aq) and extracted with ethyl acetate. The combined organic extracts were dried over sodium sulfate and concentrated under reduced pressure. Purification by flash purification column chromatography (01:99 to 10:90, THF:CH<sub>2</sub>Cl<sub>2</sub>) followed by trituration with ether/*n*-pentane yielded *tert*-butyl (6-bromo-2-oxo-1,2,3,4-tetrahydro-1,8-naphthyridin-3-yl)carbamate (**5**, 1.48 g, 3.46 mmol, 41%) as a white solid.

<sup>1</sup>H NMR (500 MHz, Chloroform-*d*): δ 9.68 (s, 1H), 8.32 (s, 1H), 7.65 (s, 1H), 5.63 (s, 1H), 4.42 – 4.30 (m, 1H), 3.52 (dd, *J* = 16.4, 6.4 Hz, 1H), 2.83 (t, *J* = 14.9 Hz, 1H), 1.48 (s, 9H).

<sup>13</sup>C NMR (126 MHz, Chloroform-*d*): δ 169.16, 155.72, 148.68, 147.95, 139.50, 119.83, 114.37, 80.54, 49.85, 31.17, 28.48.

**HRMS (ESI):** *m/z* calc for C<sub>13</sub>H<sub>16</sub>BrN<sub>3</sub>O<sub>3</sub> [M+H]<sup>+</sup>: 342.0448, found: 342.0451.

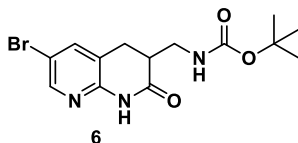

*tert*-butyl ((6-bromo-2-oxo-1,2,3,4-tetrahydro-1,8-naphthyridin-3-yl)methyl)carbamate (**6**). To a solution of LHMDS (1 M in THF, 4 eq, 36 mmol) cooled to -78 °C was added a solution ethyl 3-((*tert*-butoxycarbonyl)amino)propanoate (**S2**, 2 eq, 18 mmol) in THF (36 mL) dropwise. The reaction mixture was stirred for 1.5 h followed by the portionwise addition (3 portions at 15 min intervals) of 5-bromo-3-(bromomethyl)pyridin-2-amine hydrobromide (**S4**, 1 eq, 9 mmol) via a solid addition tube kept under N<sub>2</sub>. The reaction mixture was kept at -78 °C for several hours and allowed to warm to -40 °C overnight. The reaction mixture was quenched with 0.5M HCl (aq) and extracted with ethyl acetate. The combined organic extracts were dried over sodium sulfate and concentrated under reduced pressure. Purification by flash purification column chromatography (01:99 to 10:90, THF:CH<sub>2</sub>Cl<sub>2</sub>) followed by trituration with ether/*n*-pentane yielded *tert*-butyl ((6-bromo-2-oxo-1,2,3,4-tetrahydro-1,8-naphthyridin-3-yl)methyl)carbamate (**6**, 1.431 g, 4.02 mmol, 45%) as a white solid.



**<sup>1</sup>H NMR** (500 MHz, Chloroform-*d*): δ 9.38 (s, 1H), 8.28 (s, 1H), 7.63 (s, 1H), 5.31 (d, *J* = 6.9 Hz, 1H), 3.71 – 3.55 (m, 1H), 3.48 (dt, *J* = 13.7, 6.3 Hz, 1H), 2.95 (dd, *J* = 16.1, 6.9 Hz, 1H), 2.89 (t, *J* = 14.5 Hz, 1H), 2.74 (ddt, *J* = 13.0, 6.7, 3.4 Hz, 1H), 1.43 (s, 9H).

**<sup>13</sup>C NMR** (126 MHz, Chloroform-*d*): δ 172.23, 156.45, 149.34, 147.35, 138.99, 120.65, 113.89, 79.69, 40.77, 40.01, 28.53, 27.84.

**HRMS (ESI):** *m/z* calc for C<sub>14</sub>H<sub>18</sub>BrN<sub>3</sub>O<sub>3</sub> [M+H]<sup>+</sup>: 356.0604, found: 356.0609.

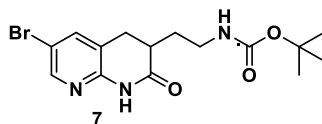

*tert*-butyl (2-(6-bromo-2-oxo-1,2,3,4-tetrahydro-1,8-naphthyridin-3-yl)ethyl)carbamate (**7**). To a solution of LHMDS (1 M in THF, 4 eq, 18 mmol) cooled to -78 °C was added a solution ethyl 4-((*tert*-butoxycarbonyl)amino)butanoate (**S3**, 2 eq, 9 mmol) in THF (18 mL) dropwise. The reaction mixture was stirred for 1.5 h followed by the portionwise addition (2 portions at 15 min intervals) of 5-bromo-3-(bromomethyl)pyridin-2-amine hydrobromide (**S4**, 1 eq, 4.5 mmol) via a solid addition tube kept under N<sub>2</sub>. The reaction mixture was kept at -78 °C for several hours and allowed to warm to -40 °C overnight. The reaction mixture was quenched with 0.5M HCl (aq) and extracted with ethyl acetate. The combined organic extracts were dried over sodium sulfate and concentrated under reduced pressure. Purification by flash purification column chromatography (01:99 to 10:90, THF:CH<sub>2</sub>Cl<sub>2</sub>) followed by trituration with ether/*n*-pentane yielded *tert*-butyl (2-(6-bromo-2-oxo-1,2,3,4-tetrahydro-1,8-naphthyridin-3-yl)ethyl)carbamate (**7**, 0.740 g, 2.01 mmol, 45%) as a white solid.

**<sup>1</sup>H NMR** (500 MHz, Chloroform-*d*): δ 8.73 (s, 1H), 8.25 (d, *J* = 2.2 Hz, 1H), 7.62 (d, *J* = 2.1 Hz, 1H), 4.81 (s, 1H), 3.44 – 3.29 (m, 1H), 3.28 – 3.17 (m, 1H), 3.08 (dd, *J* = 16.0, 6.1 Hz, 1H), 2.78 (dd, *J* = 16.0, 9.8 Hz, 1H), 2.65 (dq, *J* = 9.8, 6.6 Hz, 1H), 2.00 (dq, *J* = 13.8, 6.9 Hz, 1H), 1.82 – 1.67 (m, 1H), 1.43 (s, 9H).

**<sup>13</sup>C NMR** (126 MHz, Chloroform-*d*): δ 172.83, 156.19, 149.31, 147.47, 138.98, 120.11, 113.80, 79.53, 38.23, 37.37, 30.33, 29.67, 28.55.

**HRMS (ESI):** *m/z* calc for C<sub>15</sub>H<sub>20</sub>BrN<sub>3</sub>O<sub>3</sub> [M+H]<sup>+</sup>: 370.0761, found: 370.0766.

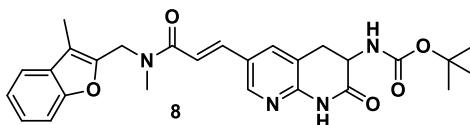

*tert*-butyl(*E*)-(6-(3-(methyl((3-methylbenzofuran-2-yl)methyl)amino)-3-oxoprop-1-en-1-yl)-2-oxo-1,2,3,4-tetrahydro-1,8-naphthyridin-3-yl)carbamate (**8**). Anhydrous DMA (10 mL, sparged with N<sub>2</sub> before using) was added to a flask containing **4** (1.5 eq, 1.875 mmol), **5** (1 eq, 1.25 mmol), palladium(II) acetate (0.2 eq, 0.25 mmol), and tricyclohexylphosphine tetrafluoroborate (0.4 eq, 0.5 mmol) followed by the addition of *N,N*-diisopropylethylamine (2 eq, 2.5 mmol, distilled and sparged with N<sub>2</sub> before using). The reaction mixture was heated to 90-100 °C for 24 h. After reaction completion, the reaction mixture was diluted with ethyl acetate and filtered through a pad of celite and the filtrate was washed with saturated sodium bicarbonate. The combined organic extracts were dried over sodium sulfate and concentrated under reduced pressure. Purification by flash purification column chromatography (10:90 to 20:00, THF:CH<sub>2</sub>Cl<sub>2</sub>) followed by trituration with ether/*n*-pentane

yielded *tert*-butyl (*E*)-((6-(3-(methyl((3-methylbenzofuran-2-yl)methyl)amino)-3-oxoprop-1-en-1-yl)-2-oxo-1,2,3,4-tetrahydro-1,8-naphthyridin-3-yl)carbamate (**8**, 0.374 g, 0.762 mmol, 61%) as a white solid.

**Note:** Tabulated NMR data for acrylamide derivatives consist of two rotamers that exist at room temperature in a ratio of 40:60 and is reflected in the reported integral values.

<sup>1</sup>H NMR (600 MHz, DMSO-*d*<sub>6</sub>, 25 °C): δ 10.82 (s, 1H), 8.48 – 8.33 (m, 1H), 8.17 – 8.02 (m, 1H), 7.60 – 7.54 (m, 1H), 7.54 – 7.44 (m, 2.4H), 7.30 – 7.22 (m, 2H), 7.20 (d, *J* = 15.4 Hz, 0.6H), 7.12 – 6.97 (m, 1H), 4.98 (s, 0.8H), 4.79 (s, 1.2H), 4.40 – 4.17 (m, 1H), 3.18 (s, 1.8H), 3.08 – 2.91 (m, 3.2H), 2.26 (s, 3H), 1.41 (s, 9H).

<sup>1</sup>H NMR (600 MHz, DMSO-*d*<sub>6</sub>, 115 °C): δ 10.33 (s, 1H), 8.36 (d, *J* = 2.1 Hz, 1H), 7.97 (s, 1H), 7.55 (d, *J* = 7.5 Hz, 1H), 7.49 (d, *J* = 15.4 Hz, 1H), 7.45 (d, *J* = 8.1 Hz, 1H), 7.28 (t, *J* = 7.6 Hz, 1H), 7.24 (t, *J* = 7.5 Hz, 1H), 7.22 – 7.16 (m, 1H), 6.57 (d, *J* = 7.8 Hz, 1H), 4.85 (s, 2H), 4.26 (dt, *J* = 13.9, 7.2 Hz, 1H), 3.16 – 3.06 (m, 4H), 3.05 – 2.98 (m, 1H), 2.27 (s, 3H), 1.44 (s, 9H).

<sup>13</sup>C NMR (151 MHz, DMSO-*d*<sub>6</sub>, 115 °C): δ 168.63, 165.20, 154.67, 153.13, 150.96, 148.64, 146.37, 137.28, 133.72, 128.96, 125.41, 123.61, 121.76, 118.74, 117.92, 117.39, 112.12, 110.10, 77.93, 49.08, 42.28 (brs, see HSQC) 33.72 (brs), 29.87, 27.66, 6.61.

**HRMS (ESI):** *m/z* calc for C<sub>27</sub>H<sub>30</sub>N<sub>4</sub>O<sub>5</sub> [M+H]<sup>+</sup>:491.2289, found: 491.2302.

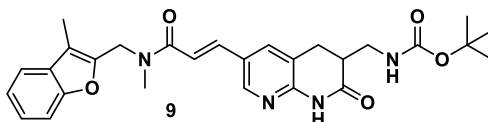

*tert*-butyl(*E*)-((6-(3-(methyl((3-methylbenzofuran-2-yl)methyl)amino)-3-oxoprop-1-en-1-yl)-2-oxo-1,2,3,4-tetrahydro-1,8-naphthyridin-3-yl)methyl)carbamate (**9**). Anhydrous DMA (32 mL, sparged with N<sub>2</sub> before using) was added to a flask containing **4** (1.5 eq, 6 mmol), **6** (1 eq, 4 mmol), palladium(II) acetate (0.2 eq, 0.8 mmol), and tricyclohexylphosphine tetrafluoroborate (0.4 eq, 1.6 mmol) followed by the addition of *N,N*-diisopropylethylamine (2 eq, 8 mmol, distilled and sparged with N<sub>2</sub> before using). The reaction mixture was heated to 90-100 °C for 24 h. After reaction completion, the reaction mixture was diluted with ethyl acetate and filtered through a pad of celite and the filtrate was washed with saturated sodium bicarbonate. The combined organic extracts were dried over sodium sulfate and concentrated under reduced pressure. Purification by flash purification column chromatography (10:90 to 20:00, THF:CH<sub>2</sub>Cl<sub>2</sub>) followed by trituration with ether/*n*-pentane yielded *tert*-butyl (*E*)-((6-(3-(methyl((3-methylbenzofuran-2-yl)methyl)amino)-3-oxoprop-1-en-1-yl)-2-oxo-1,2,3,4-tetrahydro-1,8-naphthyridin-3-yl)methyl)carbamate (**9**, 1.285 g, 2.55 mmol, 64%) as a white solid.

**Note:** Tabulated NMR data for acrylamide derivatives consist of two rotamers that exist at room temperature in a ratio of 40:60 and is reflected in the reported integral values.

<sup>1</sup>H NMR (600 MHz, DMSO-*d*<sub>6</sub>, 25 °C): δ 10.72 (s, 1H), 8.47 – 8.32 (m, 1H), 8.15 – 8.02 (m, 1H), 7.59 – 7.54 (m, 1H), 7.54 – 7.43 (m, 2.4H), 7.31 – 7.26 (m, 1H), 7.26 – 7.17 (m, 1.6H), 6.91 – 6.81 (m, 1H), 4.99 (s, 0.8H), 4.79 (s, 1.2H), 3.51 – 3.36 (m, 1H), 3.18 (s, 1.8H), 3.12 – 2.96 (m, 2H), 2.93 (s, 1.2H), 2.81 – 2.70 (m, 1H), 2.69 – 2.59 (m, 1H), 2.26 (s, 3H), 1.45 – 1.28 (m, 9H).

<sup>1</sup>H NMR (600 MHz, DMSO-*d*<sub>6</sub>, 120 °C): δ 10.12 (s, 1H), 8.34 (s, 1H), 7.93 (s, 1H), 7.55 (d, *J* = 7.4 Hz, 1H), 7.49 (d, *J* = 15.5 Hz, 1H), 7.45 (d, *J* = 8.1 Hz, 1H), 7.28 (td, *J* = 8.1, 7.6, 1.5 Hz, 1H), 7.24 (td, *J* = 7.4, 1.1 Hz,

1H), 7.19 (d,  $J = 15.4$  Hz, 1H), 6.27 (s, 1H), 4.85 (s, 2H), 3.43 (dt,  $J = 13.6, 5.5$  Hz, 1H), 3.18 – 3.08 (m, 4H), 3.04 (dd,  $J = 15.9, 6.1$  Hz, 1H), 2.79 (dd,  $J = 15.8, 10.4$  Hz, 1H), 2.75 – 2.68 (m, 1H), 2.27 (s, 3H), 1.40 (s, 9H).

$^{13}\text{C}$  NMR (151 MHz, DMSO- $d_6$ , 120 °C):  $\delta$  170.73, 165.23, 155.00, 153.12, 151.17, 148.62, 146.07, 137.33, 133.52, 128.94, 125.39, 123.55, 121.71, 118.68, 117.74, 117.70, 112.05, 110.04, 77.38, 43.32 (brs, see HSQC), 39.58, 39.29 (solvent overlap, see HSQC), 33.69 (brs), 27.66, 26.66, 6.54.

**HRMS (ESI):**  $m/z$  calc for  $\text{C}_{28}\text{H}_{32}\text{N}_4\text{O}_5$   $[\text{M}+\text{H}]^+$ : 505.2445, found: 505.2443.

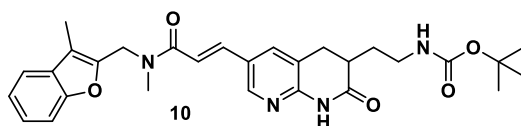

*tert-butyl (E)-(2-(6-(3-(methyl((3-methylbenzofuran-2-yl)methyl)amino)-3-oxoprop-1-en-1-yl)-2-oxo-1,2,3,4-tetrahydro-1,8-naphthyridin-3-yl)ethyl)carbamate (10)*. Anhydrous DMA (10 mL, sparged with  $\text{N}_2$  before using) was added to a flask containing **4** (1.5 eq, 1.875 mmol), **7** (1 eq, 1.25 mmol), palladium(II) acetate (0.2 eq, 0.25 mmol), and tricyclohexylphosphine tetrafluoroborate (0.4 eq, 0.5 mmol) followed by the addition of *N,N*-diisopropylethylamine (2 eq, 2.5 mmol, distilled and sparged with  $\text{N}_2$  before using). The reaction mixture was heated to 90-100 °C for 24 h. After reaction completion, the reaction mixture was diluted with ethyl acetate and filtered through a pad of celite and the filtrate was washed with saturated sodium bicarbonate. The combined organic extracts were dried over sodium sulfate and concentrated under reduced pressure. Purification by flash purification column chromatography (10:90 to 20:80, THF: $\text{CH}_2\text{Cl}_2$ ) followed by trituration with ether/*n*-pentane yielded *tert-butyl (E)-(2-(6-(3-(methyl((3-methylbenzofuran-2-yl)methyl)amino)-3-oxoprop-1-en-1-yl)-2-oxo-1,2,3,4-tetrahydro-1,8-naphthyridin-3-yl)ethyl)carbamate (10)*, 0.364 g, 0.702 mmol, 56%) as a white solid.

**Note:** Tabulated NMR data for acrylamide derivatives consist of two rotamers that exist at room temperature in a ratio of 40:60 and is reflected in the reported integral values.

$^1\text{H}$  NMR (600 MHz, DMSO- $d_6$ , 25 °C):  $\delta$  10.70 (s, 1H), 8.52 – 8.29 (m, 1H), 8.21 – 8.01 (m, 1H), 7.60 – 7.55 (m, 1H), 7.54 – 7.43 (m, 2.4H), 7.33 – 7.26 (m, 1H), 7.26 – 7.22 (m, 1H), 7.21 (d,  $J = 16.4$  Hz, 0.6H), 6.87 (t,  $J = 5.8$  Hz, 1H), 5.00 (s, 0.8H), 4.79 (s, 1.2H), 3.18 (s, 1.8H), 3.12 – 2.95 (m, 4H), 2.92 (s, 1.2H), 2.78 – 2.67 (m, 1H), 2.33 – 2.22 (m, 3H), 1.94 – 1.84 (m, 1H), 1.47 – 1.39 (m, 1H), 1.38 – 1.28 (m, 9H).

$^1\text{H}$  NMR (600 MHz, DMSO- $d_6$ , 120 °C):  $\delta$  10.05 (s, 1H), 8.34 (s, 1H), 7.93 (s, 1H), 7.55 (d,  $J = 7.6$  Hz, 1H), 7.49 (d,  $J = 15.5$  Hz, 1H), 7.45 (d,  $J = 8.0$  Hz, 1H), 7.32 – 7.26 (m, 1H), 7.24 (t,  $J = 7.3$  Hz, 1H), 7.19 (d,  $J = 15.4$  Hz, 1H), 6.29 (s, 1H), 4.85 (s, 2H), 3.14 – 3.08 (m, 2H), 3.05 (dd,  $J = 15.9, 6.1$  Hz, 1H), 2.88 (s, 3H), 2.75 (dd,  $J = 15.9, 10.1$  Hz, 1H), 2.63 – 2.53 (m, 1H), 2.27 (s, 3H), 1.94 (dq,  $J = 13.6, 7.0$  Hz, 1H), 1.51 (dq,  $J = 13.9, 6.9$  Hz, 1H), 1.39 (s, 9H).

$^{13}\text{C}$  NMR (151 MHz, DMSO- $d_6$ , 120 °C):  $\delta$  171.96, 165.22, 154.95, 153.11, 151.32, 148.62, 146.10, 137.34, 133.32, 128.94, 125.28, 123.55, 121.71, 118.68, 117.92, 117.68, 112.05, 110.04, 77.01, 42.26, (brs, see HSQC) 37.59, 36.76, 33.66 (brs), 29.37, 28.53, 27.68, 6.54.

**HRMS (ESI):**  $m/z$  calc for  $\text{C}_{29}\text{H}_{34}\text{N}_4\text{O}_5$   $[\text{M}+\text{H}]^+$ : 519.2602, found: 519.2616.

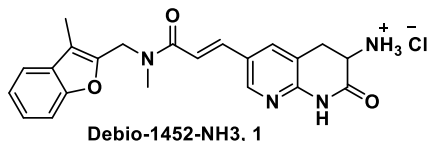

(*E*)-3-(6-amino-7-oxo-5,6,7,8-tetrahydro-1,8-naphthyridin-3-yl)-*N*-methyl-*N*-((3-methylbenzofuran-2-yl)methyl)acrylamide hydrochloride (**Debio-1452-NH3, 1**). Anhydrous 4M HCl in dioxane (1 mL) was added dropwise to a solution of **8** (1 eq, 0.652 mmol) in dioxane (3 mL). The reaction mixture was stirred at room temperature. After 4 h, the reaction mixture was concentrated from CH<sub>2</sub>Cl<sub>2</sub> several times followed by trituration with ether/n-pentane to afford (*E*)-3-(6-amino-7-oxo-5,6,7,8-tetrahydro-1,8-naphthyridin-3-yl)-*N*-methyl-*N*-((3-methylbenzofuran-2-yl)methyl)acrylamide hydrochloride (**Debio-1452-NH3, 1**, 244 mg, 0.571 mmol, 88%) as a white solid.

**Note:** Tabulated NMR data for acrylamide derivatives consist of two rotamers that exist at room temperature in a ratio of 40:60 and is reflected in the reported integral values.

<sup>1</sup>H NMR (600 MHz, DMSO-*d*<sub>6</sub>, 25 °C): δ 11.33 (s, 1H), 8.79 – 8.66 (m, 3H), 8.55 – 8.43 (m, 1H), 8.31 – 8.20 (m, 1H), 7.62 – 7.55 (m, 1H), 7.55 – 7.45 (m, 2.4H), 7.33 – 7.26 (m, 1.6H), 7.26 – 7.21 (m, 1H), 5.01 (s, 0.8H), 4.79 (s, 1.2H), 4.44 – 4.28 (m, 1H), 3.35 – 3.24 (m, 1H), 3.24 – 3.06 (m, 2.8H), 2.92 (s, 1.2H), 2.26 (s, 3H).

<sup>1</sup>H NMR (600 MHz, DMSO-*d*<sub>6</sub>, 120 °C): δ 10.90 (s, 1H), 8.63 (s, 3H), 8.44 (s, 1H), 8.08 (s, 1H), 7.55 (d, *J* = 7.9 Hz, 1H), 7.51 (d, *J* = 15.4 Hz, 1H), 7.45 (d, *J* = 8.2 Hz, 1H), 7.36 – 7.18 (m, 3H), 4.86 (s, 2H), 4.28 (dd, *J* = 14.1, 6.9 Hz, 1H), 3.38 (dd, *J* = 15.6, 6.7 Hz, 1H), 3.21 (t, *J* = 14.7 Hz, 1H), 3.11 (s, 3H), 2.27 (d, *J* = 2.3 Hz, 3H).

<sup>13</sup>C NMR (151 MHz, DMSO, 120 °C): δ 166.20, 165.14, 153.13, 150.23, 148.61, 146.69, 136.90, 134.20, 128.95, 126.14, 123.61, 121.76, 118.74, 118.63, 115.77, 112.13, 110.07, 47.37, 42.37 (brs, see HSQC), 33.54 (brs, see HSQC), 27.44, 6.59.

**HRMS (ESI):** *m/z* calc for C<sub>22</sub>H<sub>22</sub>N<sub>4</sub>O<sub>3</sub> [M+H]<sup>+</sup> (**Note:** hydrochloride salt not observed): 391.1765, found: 391.1773.

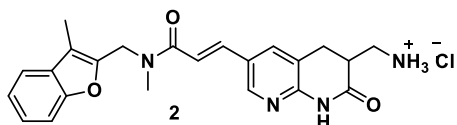

(*E*)-3-(6-(aminomethyl)-7-oxo-5,6,7,8-tetrahydro-1,8-naphthyridin-3-yl)-*N*-methyl-*N*-((3-methylbenzofuran-2-yl)methyl)acrylamide hydrochloride (**2**) - Anhydrous 4M HCl in dioxane (1 mL) was added dropwise to a solution of **9** (1 eq, 0.6 mmol) in dioxane (3 mL). The reaction mixture was stirred at room temperature. After 4 h, the reaction mixture was concentrated from CH<sub>2</sub>Cl<sub>2</sub> several times followed by trituration with ether/n-pentane to afford (*E*)-3-(6-(aminomethyl)-7-oxo-5,6,7,8-tetrahydro-1,8-naphthyridin-3-yl)-*N*-methyl-*N*-((3-methylbenzofuran-2-yl)methyl)acrylamide hydrochloride (**2**, 256 mg, 0.581 mmol, 97%) as a white solid.

**Note:** Tabulated NMR data for acrylamide derivatives consist of two rotamers that exist at room temperature in a ratio of 40:60 and is reflected in the reported integral values.

**<sup>1</sup>H NMR** (600 MHz, DMSO-*d*<sub>6</sub>, 25 °C): δ 11.03 (s, 1H), 8.49 – 8.40 (m, 1H), 8.21 – 8.04 (m, 4H), 7.59 – 7.55 (m, 1H), 7.55 – 7.46 (m, 2.4H), 7.31 – 7.21 (m, 2.6H), 5.01 (s, 0.8H), 4.79 (s, 1.2H), 3.29 – 3.21 (m, 1H), 3.19 (s, 1.8H), 3.08 – 2.97 (m, 3H), 2.95 – 2.85 (m, 2.2H), 2.32 – 2.19 (m, 3H).

**<sup>1</sup>H NMR** (600 MHz, DMSO-*d*<sub>6</sub>, 120 °C): δ 10.49 (s, 1H), 8.40 (d, *J* = 2.2 Hz, 1H), 8.15 (s, 3H), 7.96 (s, 1H), 7.55 (d, *J* = 7.6 Hz, 1H), 7.50 (d, *J* = 15.5 Hz, 1H), 7.45 (d, *J* = 8.0 Hz, 1H), 7.28 (td, *J* = 8.1, 7.7, 1.5 Hz, 1H), 7.26 – 7.12 (m, 2H), 4.85 (s, 2H), 3.31 – 3.27 (m, 1H), 3.14 – 3.02 (m, 6H), 2.96 – 2.90 (m, 1H), 2.27 (s, 3H).

**<sup>13</sup>C NMR** (151 MHz, DMSO-*d*<sub>6</sub>, 120 °C): δ 170.24, 165.20, 153.12, 150.80, 148.63, 146.25, 137.15, 133.57, 128.94, 125.74, 123.59, 121.74, 118.72, 118.20, 117.47, 112.10, 110.06, 42.40 (brs, see HSQC), 38.34, 36.80, 33.73 (brs), 26.66, 6.58.

**HRMS (ESI):** *m/z* calc for C<sub>23</sub>H<sub>24</sub>N<sub>4</sub>O<sub>3</sub> [M+H]<sup>+</sup> (**Note:** hydrochloride salt not observed): 405.1921, found: 405.1927

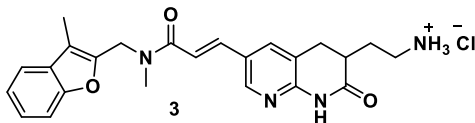

(*E*)-3-(6-(aminoethyl)-7-oxo-5,6,7,8-tetrahydro-1,8-naphthyridin-3-yl)-*N*-methyl-*N*-((3-methylbenzofuran-2-yl)methyl)acrylamide hydrochloride (**3**). Anhydrous 4M HCl in dioxane (1 mL) was added dropwise to a solution of **10** (1 eq, 0.6 mmol) in dioxane (3 mL). The reaction mixture was stirred at room temperature. After 4 h, the reaction mixture was concentrated from CH<sub>2</sub>Cl<sub>2</sub> several times followed by trituration with ether/pentane to afford (*E*)-3-(6-(aminoethyl)-7-oxo-5,6,7,8-tetrahydro-1,8-naphthyridin-3-yl)-*N*-methyl-*N*-((3-methylbenzofuran-2-yl)methyl)acrylamide hydrochloride (**3**, 244 mg, 0.536 mmol, 89%) as a white solid.

**Note:** Tabulated NMR data for acrylamide derivatives consist of two rotamers that exist at room temperature in a ratio of 40:60 and is reflected in the reported integral values.

**<sup>1</sup>H NMR** (600 MHz, DMSO-*d*<sub>6</sub>, 25 °C): δ 10.80 (s, 1H), 8.47 – 8.37 (m, 1H), 8.17 – 8.09 (m, 1H), 8.06 – 7.95 (m, 3H), 7.60 – 7.54 (m, 1H), 7.54 – 7.43 (m, 2.4H), 7.30 – 7.26 (m, 1H), 7.26 – 7.17 (m, 1.6H), 4.99 (s, 0.8H), 4.79 (s, 1.2H), 3.18 (s, 1.8H), 3.03 – 2.97 (m, 1H), 2.96 – 2.89 (m, 3.2H), 2.80 – 2.67 (m, 2H), 2.30 – 2.22 (m, 3H), 2.10 – 2.00 (m, 1H), 1.71 – 1.63 (m, 1H).

**<sup>1</sup>H NMR** (600 MHz, DMSO-*d*<sub>6</sub>, 115 °C): δ 10.27 (s, 1H), 8.38 (s, 1H), 7.96 (s, 1H), 7.83 (s, 3H), 7.55 (d, *J* = 7.6 Hz, 1H), 7.50 (d, *J* = 15.4 Hz, 1H), 7.45 (d, *J* = 8.1 Hz, 1H), 7.28 (t, *J* = 7.7 Hz, 1H), 7.24 (t, *J* = 7.4 Hz, 1H), 7.20 (d, *J* = 15.4 Hz, 1H), 4.85 (s, 2H), 3.11 (s, 3H), 3.05 (dd, *J* = 15.4, 5.7 Hz, 1H), 3.03 – 2.89 (m, 2H), 2.79 (dd, *J* = 15.4, 11.3 Hz, 1H), 2.76-2.69 (m, 1H), 2.27 (s, 3H), 2.10 (dq, *J* = 14.4, 7.4 Hz, 1H), 1.77 (dq, *J* = 13.8, 7.0 Hz, 1H).

**<sup>13</sup>C NMR** (151 MHz, DMSO-*d*<sub>6</sub>, 115 °C): δ 171.63, 165.22, 153.13, 151.19, 148.64, 146.21, 137.35, 133.50, 128.96, 125.46, 123.63, 121.78, 118.76, 117.92, 117.85, 112.13, 110.09, 42.25 (brs, see HSQC), 36.76, 36.57, 33.71 (brs), 28.73, 27.07, 6.62.

**HRMS (ESI):** *m/z* calc for C<sub>24</sub>H<sub>26</sub>N<sub>4</sub>O<sub>3</sub> [M+H]<sup>+</sup> (**Note:** hydrochloride salt not observed): 419.2078, found: 419.2071.

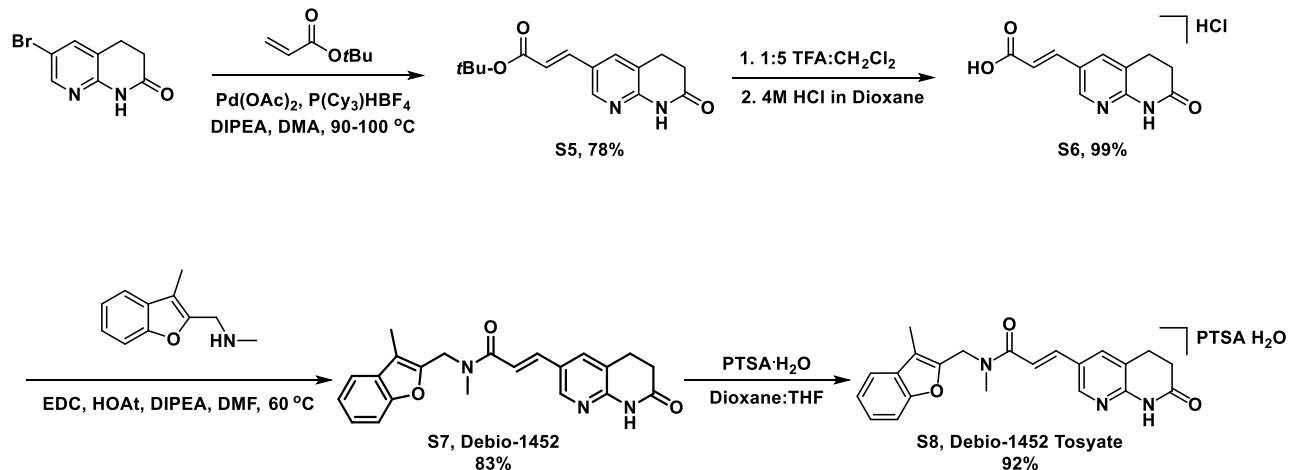

### Figure S2. Synthesis of Debio-1452 Tosylate

Cy, cyclohexyl; DIPEA, *N,N*-diisopropylethylamine ; TFA, trifluoroacetic acid; EDC, 1-ethyl-3-(3-dimethylaminopropyl)carbodiimide; HOAt, 1-hydroxy-7-azabenzotriazole; DMF, *N,N*-dimethylformamide; PTSA, *p*-toluene sulfonic acid; THF, tetrahydrofuran

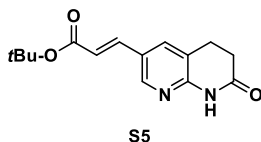

*tert*-butyl (*E*)-3-(7-oxo-5,6,7,8-tetrahydro-1,8-naphthyridin-3-yl)acrylate (**S5**). Anhydrous DMA (32 mL, sparged with N<sub>2</sub> before using) was added to a flask containing 6-bromo-3,4-dihydro-1,8-naphthyridin-2(1*H*)-one (1 eq, 10 mmol), palladium(II) acetate (0.05 eq, 0.5 mmol), and tricyclohexylphosphine tetrafluoroborate (0.1 eq, 1.0 mmol) followed by the addition of *tert*-butyl acrylate (1.5 eq, 15 mmol, sparged with N<sub>2</sub> before using), *N,N*-diisopropylethylamine (2 eq, 20 mmol, distilled and sparged with N<sub>2</sub> before using). The reaction mixture was heated to 90-100 °C for 24 h. After reaction completion, the reaction mixture was diluted with ethyl acetate and filtered through a pad of celite and the filtrate was washed with saturated sodium bicarbonate. The combined organic extracts were dried over sodium sulfate and concentrated under reduced pressure. Purification by flash purification column chromatography (10:90 to 30:70, EtOAc:CH<sub>2</sub>Cl<sub>2</sub>) followed by trituration with ether/*n*-pentane yielded *tert*-butyl (*E*)-3-(7-oxo-5,6,7,8-tetrahydro-1,8-naphthyridin-3-yl)acrylate (**S5**, 2.151 g, 7.85 mmol, 78%) as a white solid.

<sup>1</sup>H NMR (500 MHz, Chloroform-*d*): δ 8.94 (s, 1H), 8.32 (d, *J* = 2.1 Hz, 1H), 7.65 (d, *J* = 1.5 Hz, 1H), 7.51 (d, *J* = 16.0 Hz, 1H), 6.33 (d, *J* = 16.0 Hz, 1H), 2.99 (t, *J* = 7.6 Hz, 2H), 2.71 (dd, *J* = 8.4, 6.8 Hz, 2H), 1.53 (s, 9H).

<sup>13</sup>C NMR (126 MHz, Chloroform-*d*): 170.97, 165.97, 151.95, 147.37, 139.43, 134.05, 126.16, 120.57, 118.84, 80.99, 77.36, 30.40, 28.34, 24.22.

Experimental information for the above compound has been previously reported<sup>8</sup>.

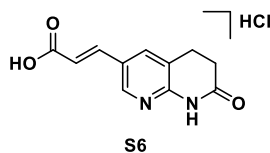

(*E*)-3-(7-oxo-5,6,7,8-tetrahydro-1,8-naphthyridin-3-yl)acrylic acid hydrochloride (**S6**). (*E*)-3-(7-oxo-5,6,7,8-tetrahydro-1,8-naphthyridin-3-yl)acrylate (**S5**) was dissolved trifluoroacetic acid:CH<sub>2</sub>Cl<sub>2</sub> (8mL:40mL) and stirred at room temperature. After 2h, the reaction mixture was concentrated several times from CH<sub>2</sub>Cl<sub>2</sub>. The crude material was suspended in 4 M HCl in dioxane (20 mL), stirred for 30 min, filtered, and rinsed with ether to afford (*E*)-3-(7-oxo-5,6,7,8-tetrahydro-1,8-naphthyridin-3-yl)acrylic acid hydrochloride (**S6**, 7.67 mmol, 99%) as a white solid.

<sup>1</sup>H NMR (500 MHz, DMSO-*d*<sub>6</sub>): δ 10.68 (s, 1H), 8.35 (d, *J* = 2.2 Hz, 1H), 8.02 (d, *J* = 2.1 Hz, 1H), 7.54 (d, *J* = 16.0 Hz, 1H), 6.51 (d, *J* = 16.0 Hz, 1H), 2.91 (t, *J* = 7.6 Hz, 2H), 2.53 (dd, *J* = 8.5, 6.8 Hz, 2H).

<sup>13</sup>C NMR (126 MHz, DMSO): δ 171.01, 167.47, 152.77, 147.33, 140.62, 133.78, 124.72, 119.20, 118.34, 29.97, 23.27.

Experimental information for the above compound has been previously reported <sup>8</sup>.

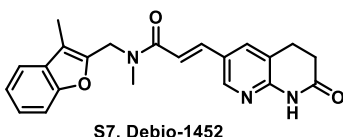

(*E*)-*N*-methyl-*N*-((3-methylbenzofuran-2-yl)methyl)-3-(7-oxo-5,6,7,8-tetrahydro-1,8-naphthyridin-3-yl)acrylamide (**S7, Debio-1452**)-To a solution of *N*-methyl-1-(3-methylbenzofuran-2-yl)methanamine (1.1 eq, 6.93 mmol), (*E*)-3-(7-oxo-5,6,7,8-tetrahydro-1,8-naphthyridin-3-yl)acrylic acid hydrochloride (1 eq, 6.3 mmol), 1-hydroxy-7-azabenzotriazole (1.1 eq, 6.93 mmol), in *N,N*-dimethylformamide (32 mL) was added *N,N*-diisopropylethylamine (2.2 eq, 13.86 mmol) followed by 1-ethyl-3-(3-dimethylaminopropyl)carbodiimide (1.1 eq, 6.93 mmol). The reaction mixture was heated to 60 °C for 6 h. The crude reaction mixture was diluted with water, filtered, rinsed with water, rinsed with ether, and dried to afford (*E*)-*N*-methyl-*N*-((3-methylbenzofuran-2-yl)methyl)-3-(7-oxo-5,6,7,8-tetrahydro-1,8-naphthyridin-3-yl)acrylamide (**S7, Debio-1452**, 1.970 g, 5.25 mmol, 83%) as a light beige solid.

**Note:** Tabulated NMR data for acrylamide derivatives consist of two rotamers that exist at room temperature in a ratio of 40:60 and is reflected in the reported integral values.

<sup>1</sup>H NMR (500 MHz, DMSO-*d*<sub>6</sub>): δ 10.65 (s, 1H), 8.41 – 8.34 (m, 1H), 8.18 – 8.00 (m, 1H), 7.59 – 7.54 (m, 1H), 7.54 – 7.45 (m, 2.4H), 7.31 – 7.26 (m, 1H), 7.26 – 7.22 (m, 1H), 7.22 – 7.16 (m, 0.6H), 4.99 (s, 0.8H), 4.79 (s, 1.2H), 3.18 (s, 1.8H), 2.92 (s, 1.2H), 2.92 – 2.87 (m, 2H), 2.57 – 2.51 (m, 2H), 2.26 (s, 3H).

Experimental information for the above compound has been previously reported <sup>6</sup>.

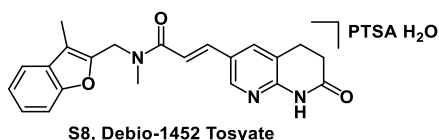

(*E*)-*N*-methyl-*N*-((3-methylbenzofuran-2-yl)methyl)-3-(7-oxo-5,6,7,8-tetrahydro-1,8-naphthyridin-3-yl)acrylamide *p*-toluenesulfonic acid monohydrate (**S8, Debio-1452 Tosylate**)- **S7, Debio-1452** (1 eq, 1.5 mmol) was suspended in THF (120 mL) and heated to reflux. After 30 min, *p*-toluene sulfonic acid monohydrate (1.05 eq, 1.58 mmol) in dioxane (12 mL) was added to the reaction mixture and stirred for 1h. The reaction mixture was allowed to cool to room temperature and diluted with a mixture of 1:1 ether:*n*-pentane (80 mL), filtered, rinsed with 1:1 ether:*n*-pentane, and dried to afford (*E*)-*N*-methyl-*N*-((3-methylbenzofuran-2-yl)methyl)-3-(7-oxo-5,6,7,8-tetrahydro-1,8-naphthyridin-3-yl)acrylamide *p*-toluenesulfonic acid (**S8, Debio-1452 Tosylate**, 0.756 g, 1.38 mmol, 92%) as a white solid. The product was further processed for *in vivo* efficacy studies to improve solubility. For these studies, **Debio-1452 Tosylate** was ground in a mortar and pestle and then sieved through a 75  $\mu$ M mesh.

**Note:** Tabulated NMR data for acrylamide derivatives consist of two rotamers that exist at room temperature in a ratio of 40:60 and is reflected in the reported integral values.

<sup>1</sup>H NMR (500 MHz, DMSO-*d*<sub>6</sub>):  $\delta$  10.69 (s, 1H), 9.49 (brs, 1H), 8.42 – 8.32 (m, 1H), 8.17 – 8.05 (m, 1H), 7.59 – 7.54 (m, 1H), 7.54 – 7.43 (m, 4.4H), 7.31 – 7.22 (m, 2H), 7.21 (d, *J* = 12.6 Hz, 0.6H), 7.15 – 7.09 (m, 2H), 4.99 (s, 0.8H), 4.79 (s, 1.2H), 3.18 (s, 1.8H), 2.96 – 2.89 (m, 3.2H), 2.57 – 2.51 (m, 2H), 2.29 (s, 3H), 2.26 (s, 3H).

Experimental information for the above compound has been previously reported <sup>6</sup>.



$^1\text{H}$  NMR (500 MHz, chloroform-*d*):

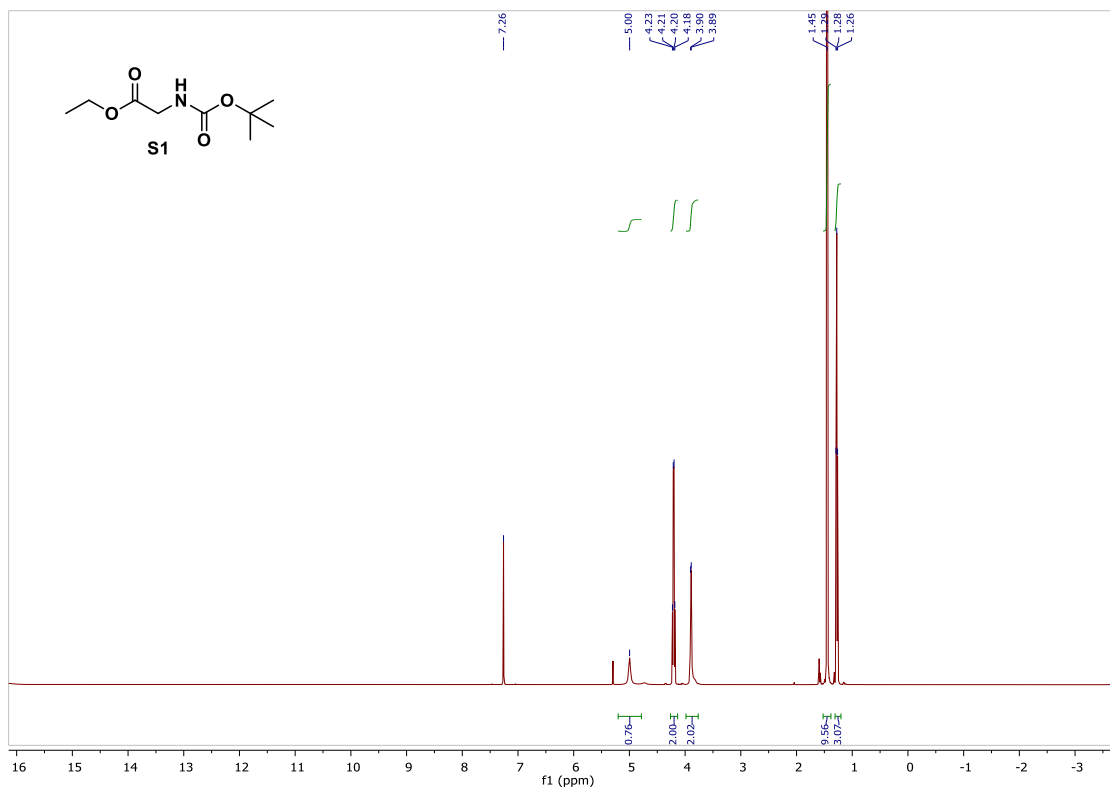

$^{13}\text{C}$  NMR (126 MHz, chloroform-*d*):

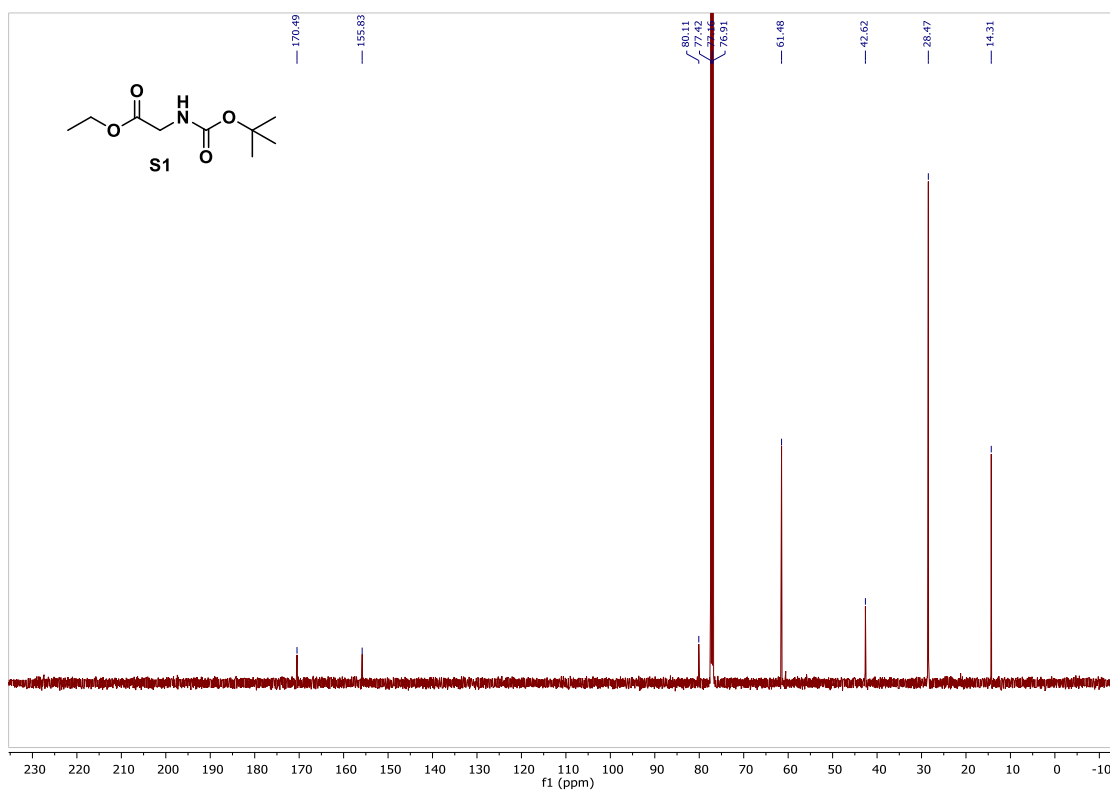

$^1\text{H}$  NMR (500 MHz, chloroform-*d*):

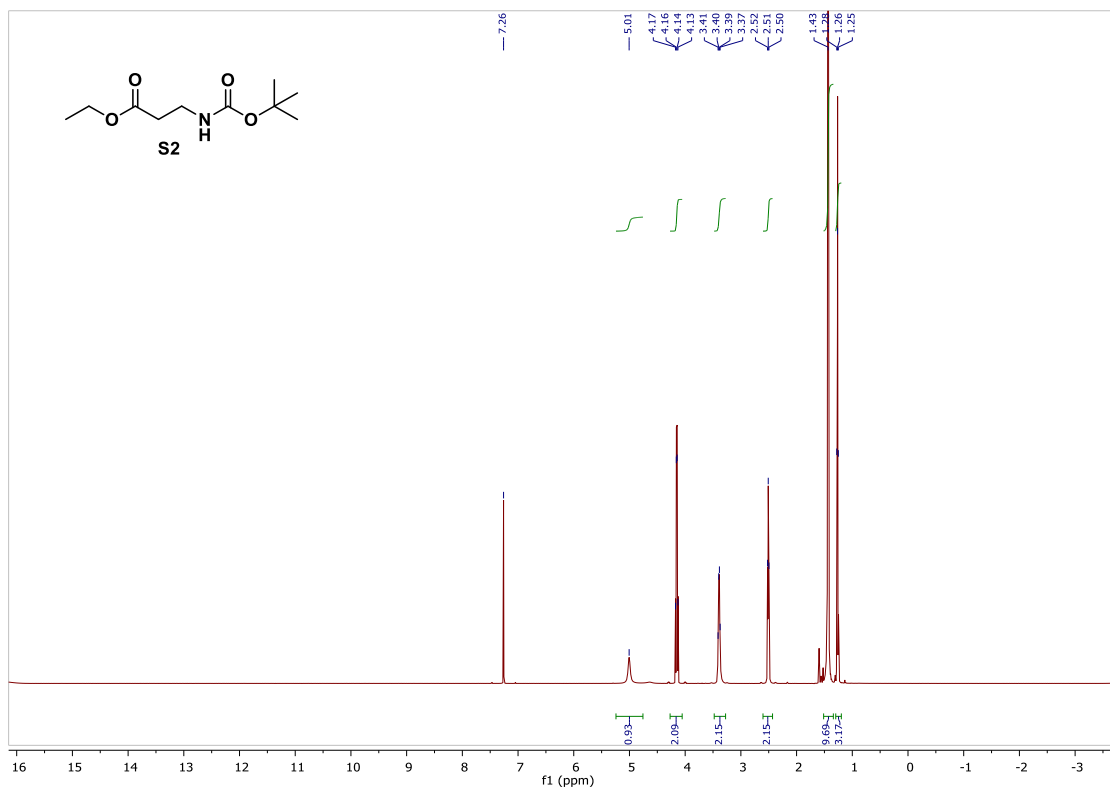

$^{13}\text{C}$  NMR (126 MHz, chloroform-*d*):

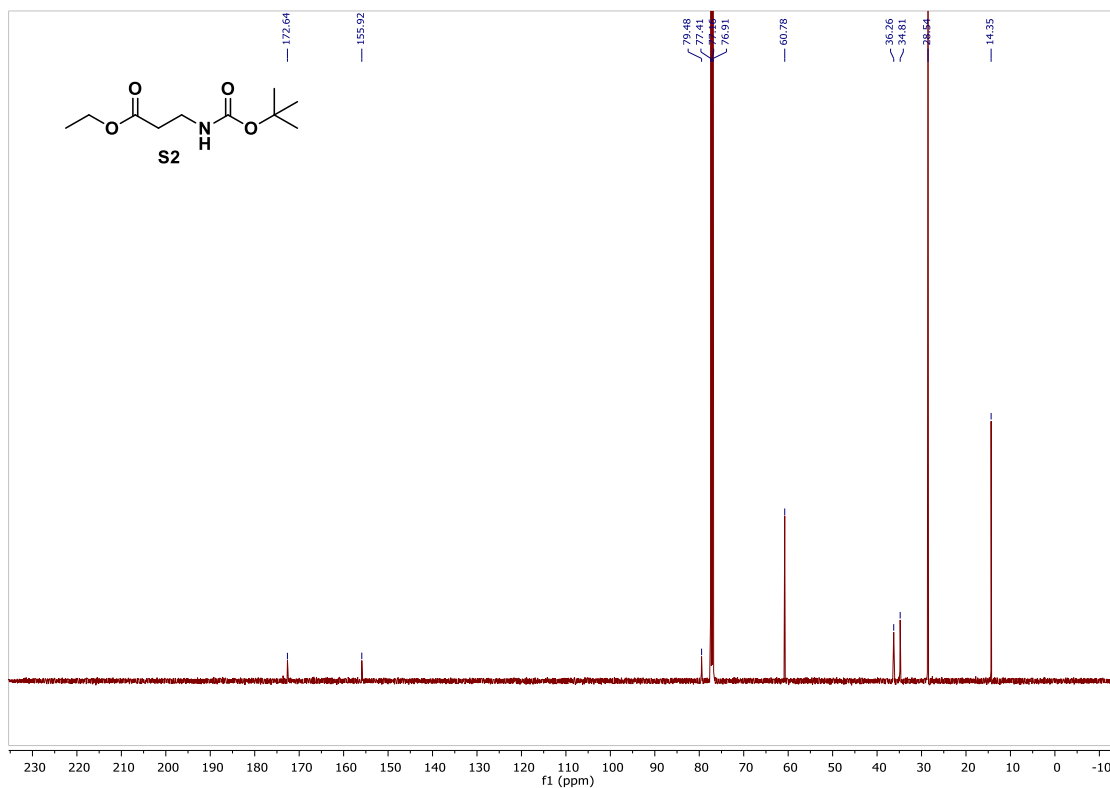

$^1\text{H}$  NMR (500 MHz, chloroform-*d*):

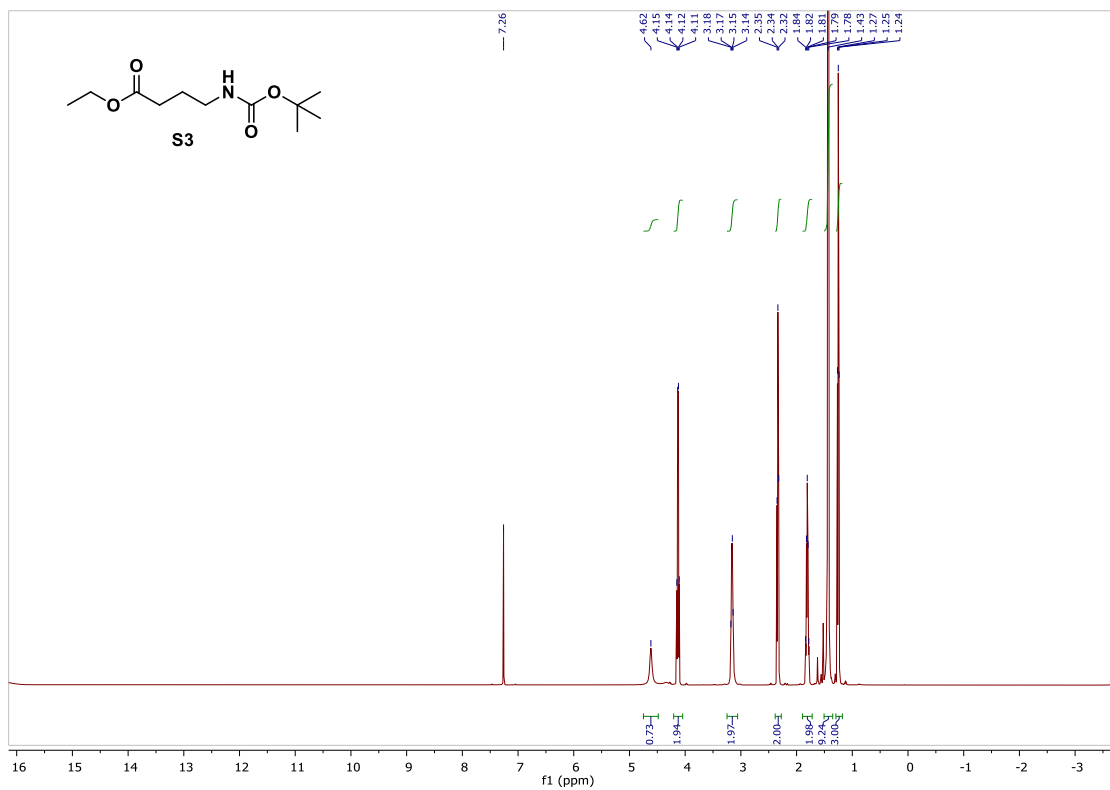

$^{13}\text{C}$  NMR (126 MHz, chloroform-*d*):

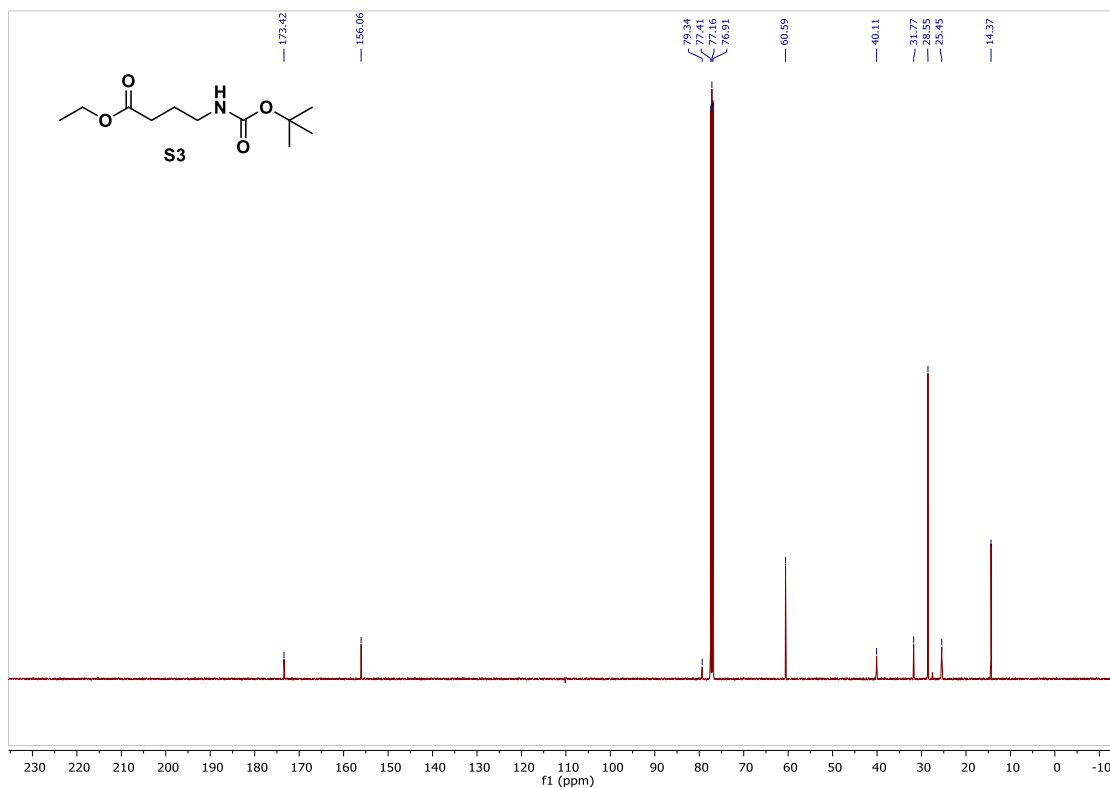

$^1\text{H}$  NMR (500 MHz,  $\text{DMSO-}d_6$ ):

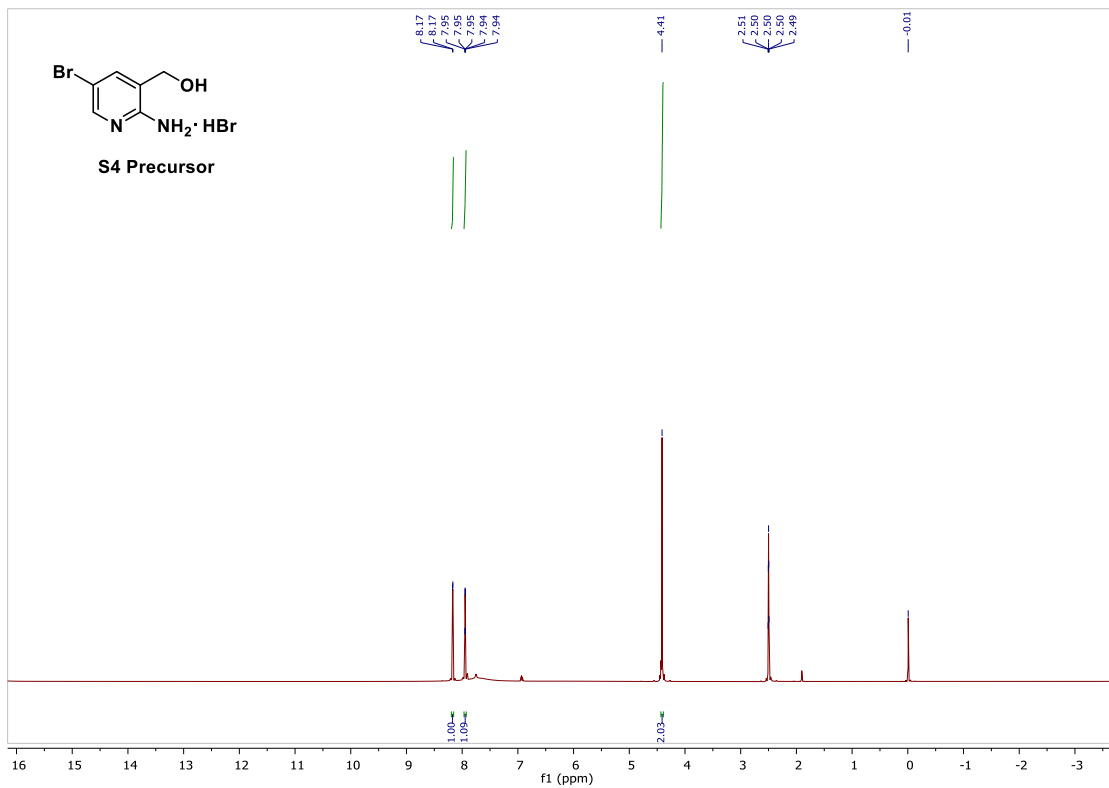

$^{13}\text{C}$  NMR (126 MHz,  $\text{DMSO-}d_6$ ):

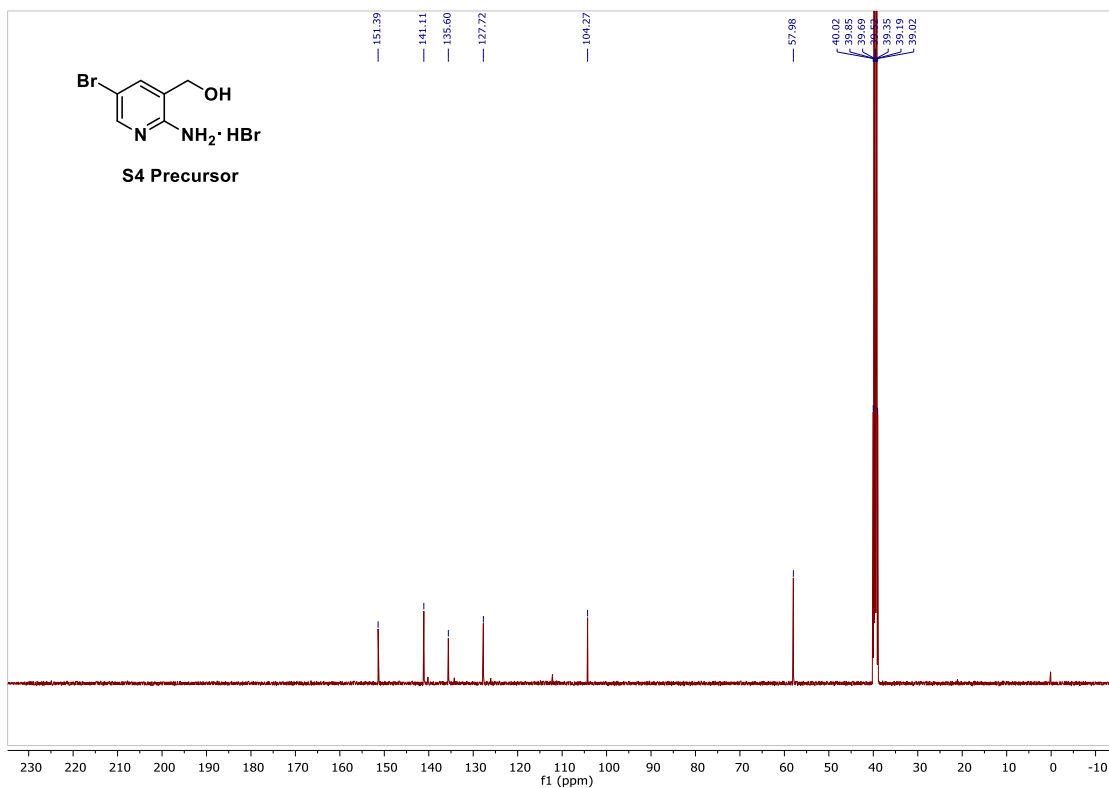

$^1\text{H}$  NMR (500 MHz,  $\text{DMSO-}d_6$ ):

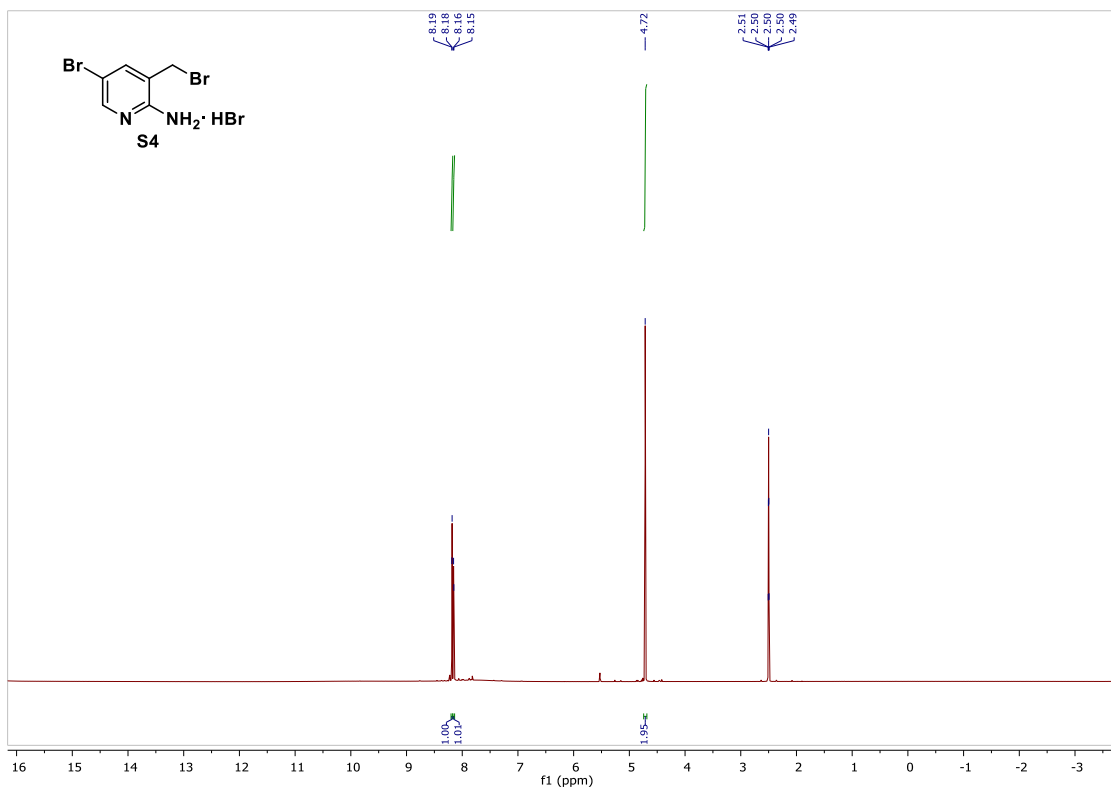

$^{13}\text{C}$  NMR (126 MHz,  $\text{DMSO-}d_6$ ):

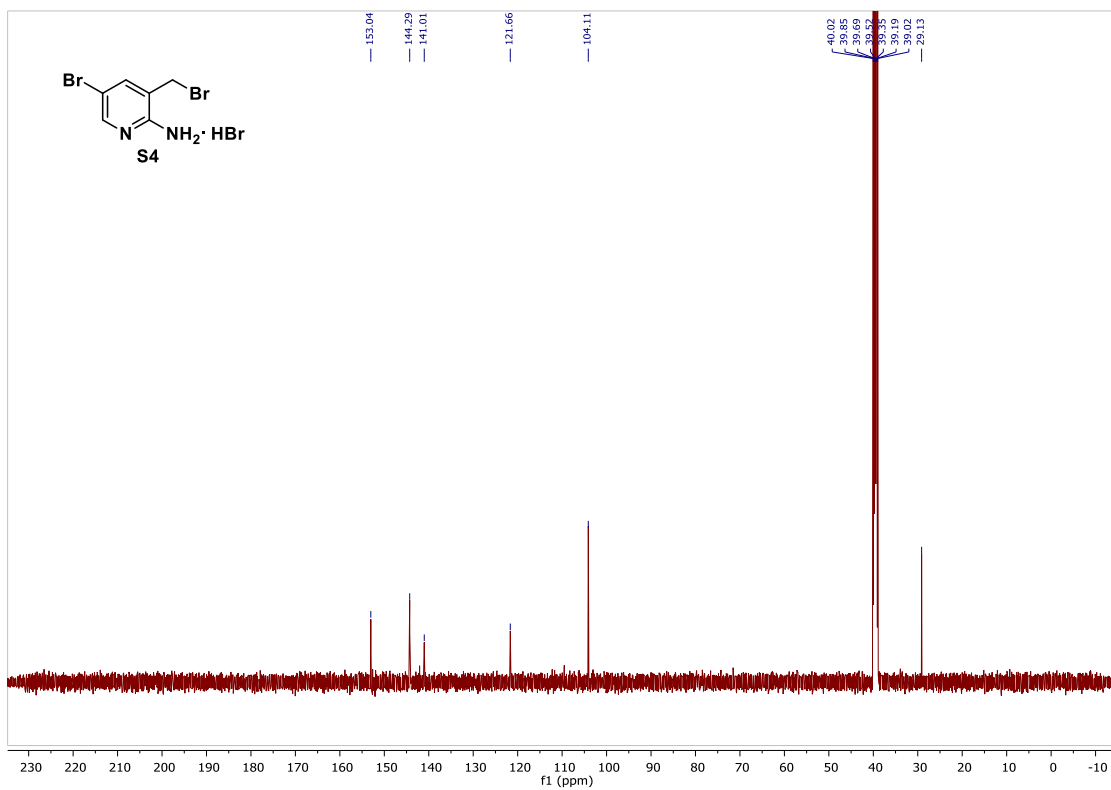

$^1\text{H}$  NMR (500 MHz, chloroform-*d*):

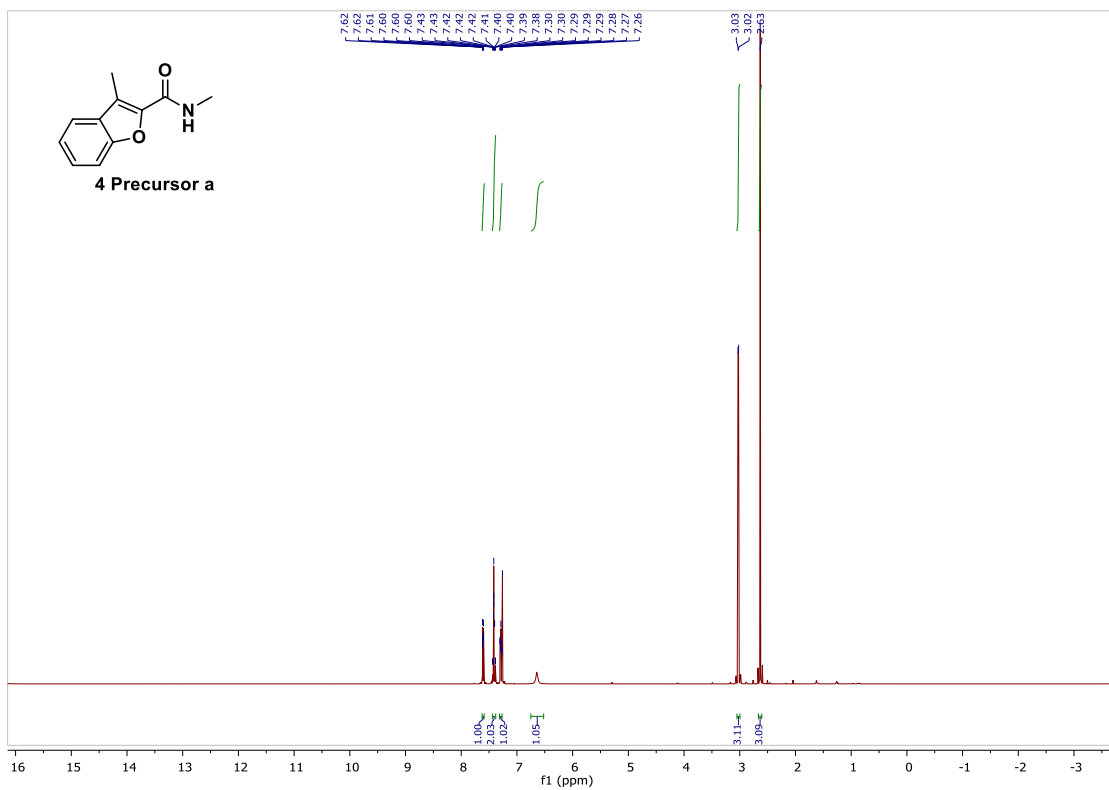

$^{13}\text{C}$  NMR (126 MHz, chloroform-*d*):

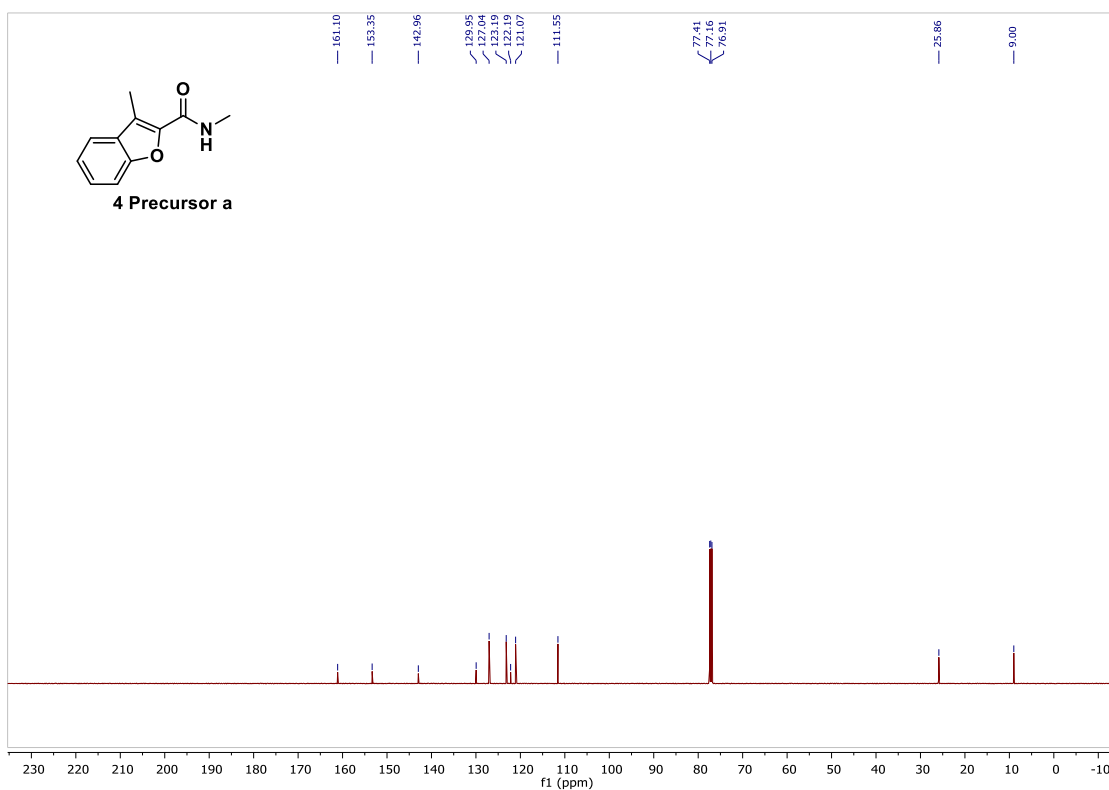

$^1\text{H}$  NMR (500 MHz, chloroform-*d*):

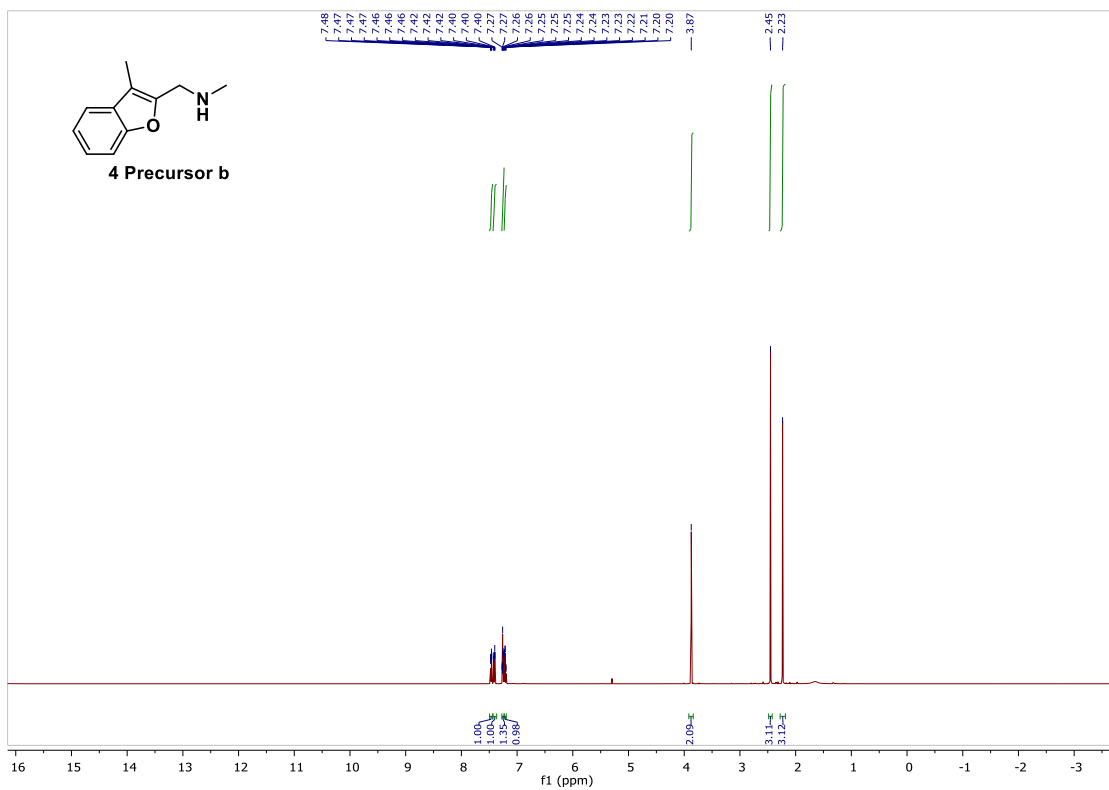

$^{13}\text{C}$  NMR (126 MHz, chloroform-*d*):

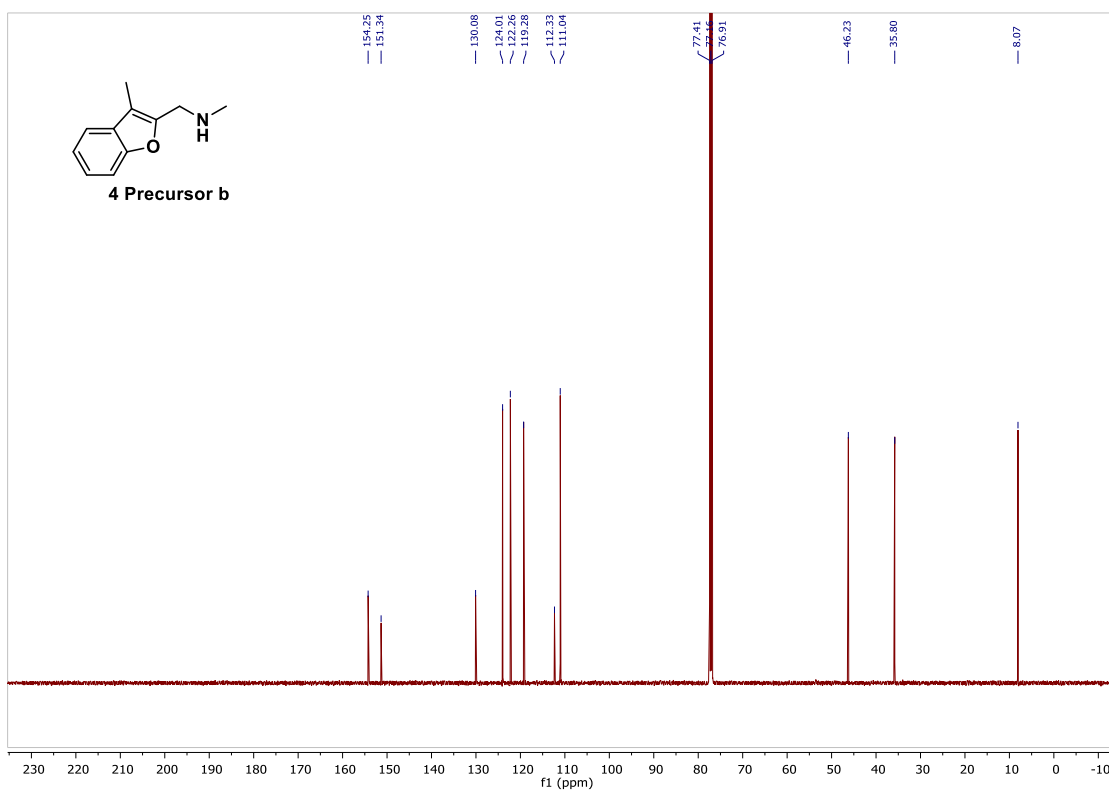

$^1\text{H}$  NMR (500 MHz, chloroform-*d*):

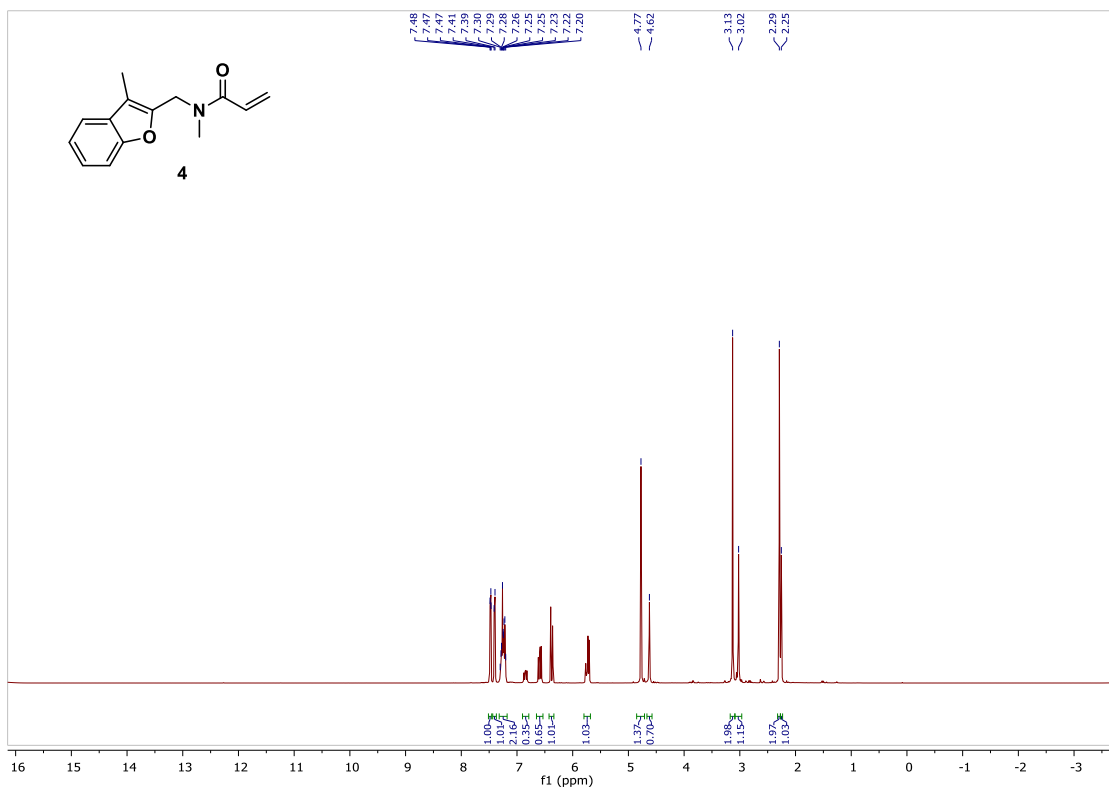

$^{13}\text{C}$  NMR (126 MHz, chloroform-*d*):

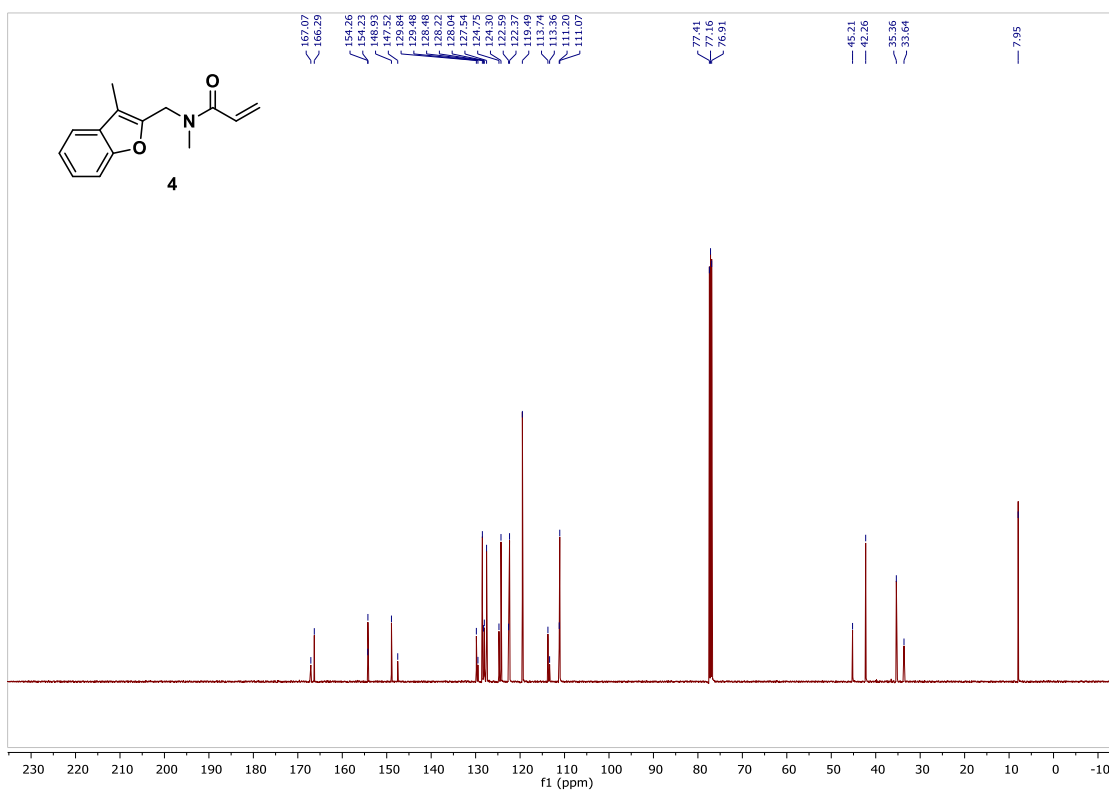



$^1\text{H}$  NMR (500 MHz, chloroform-*d*):

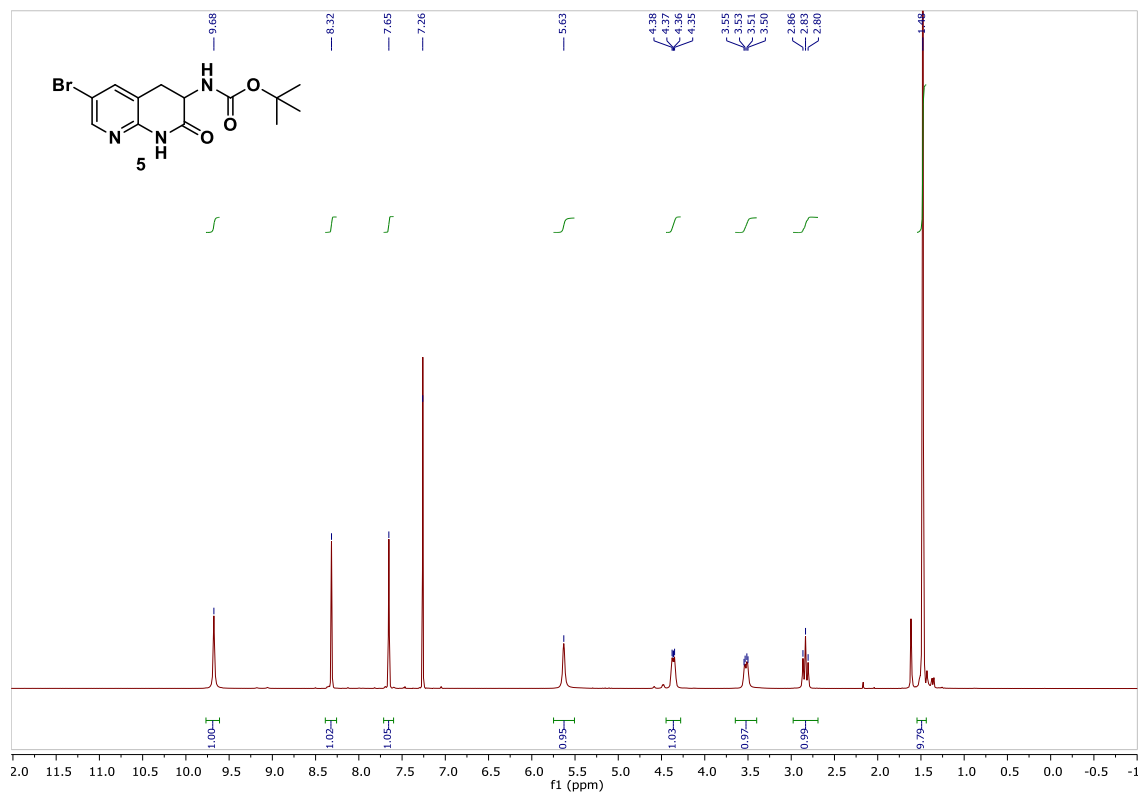

$^{13}\text{C}$  NMR (126 MHz, chloroform-*d*):

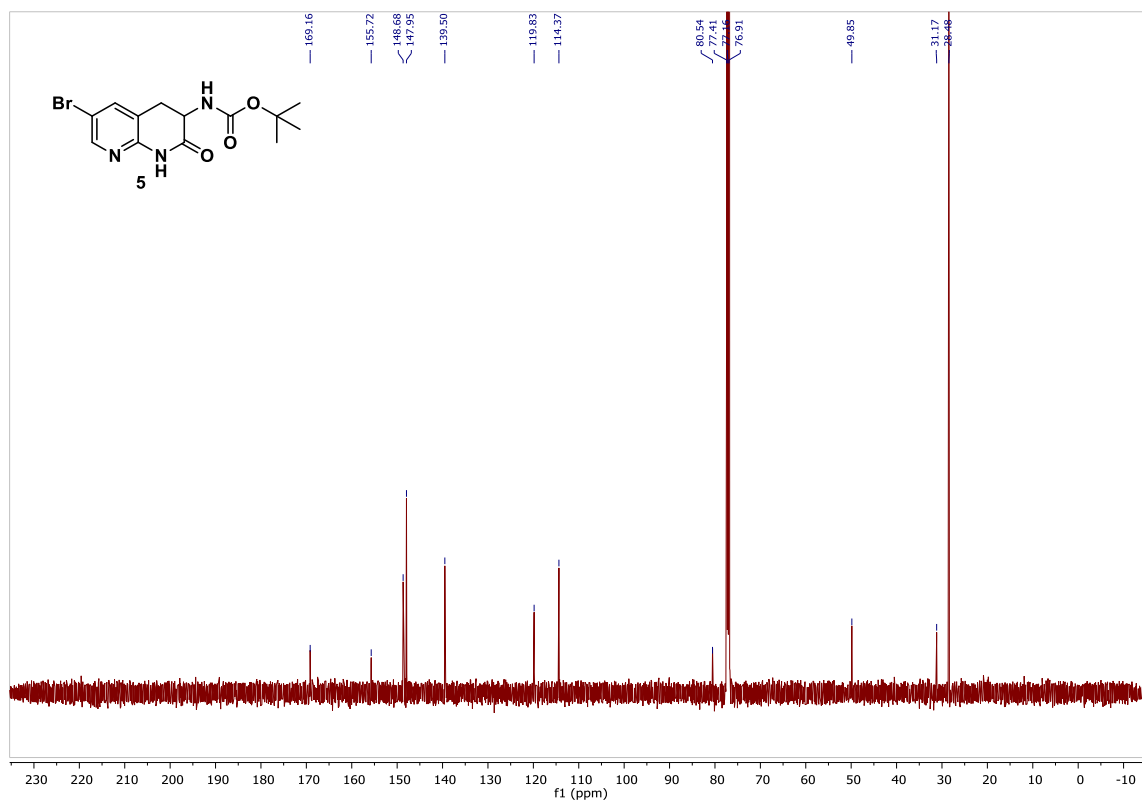

<sup>1</sup>H NMR (500 MHz, chloroform-*d*):

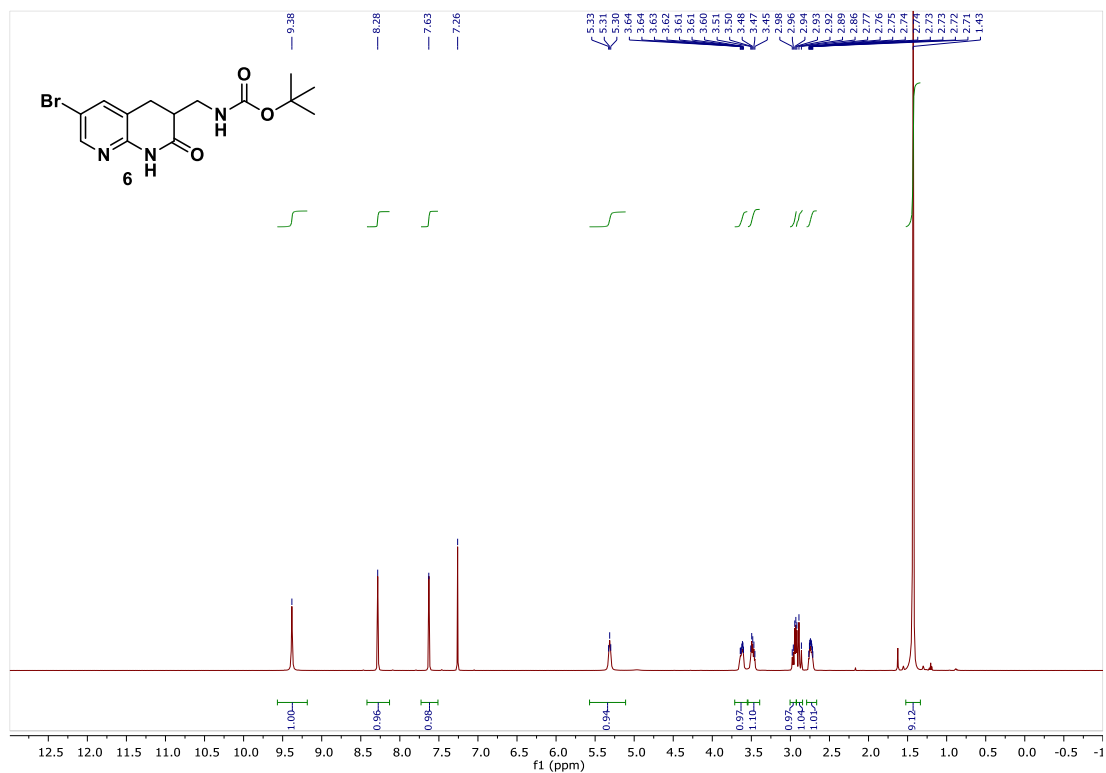

<sup>13</sup>C NMR (126 MHz, chloroform-*d*):

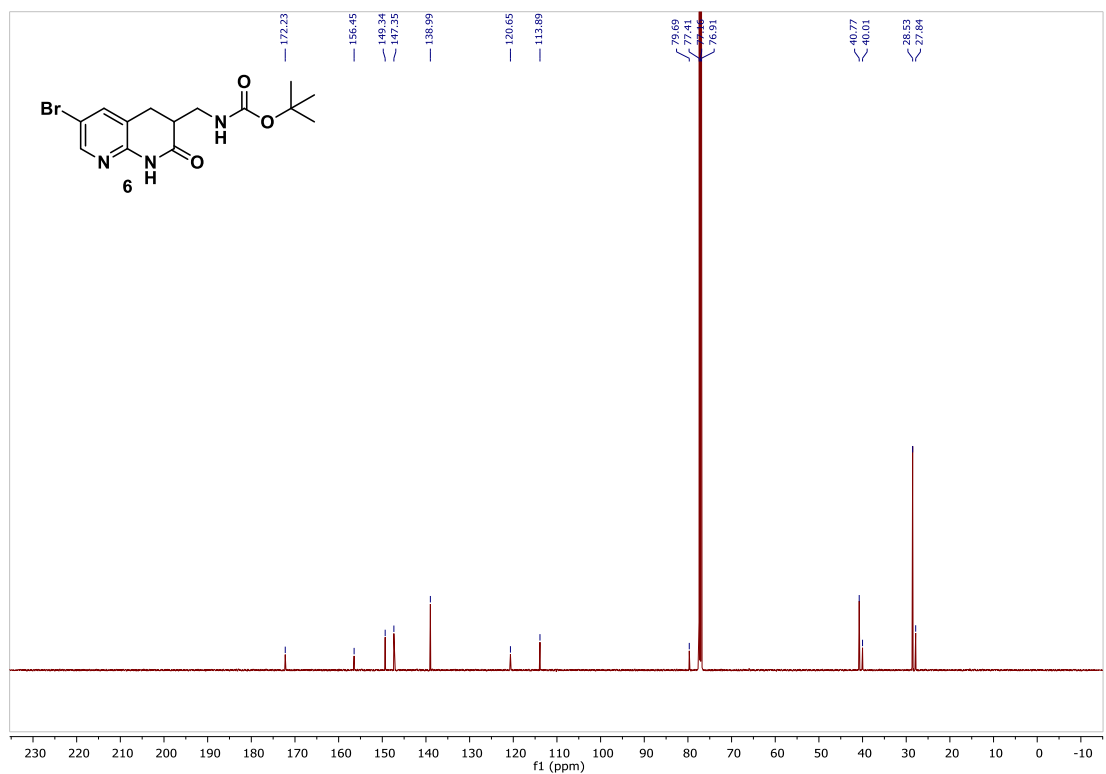

$^1\text{H}$  NMR (500 MHz, chloroform-*d*):

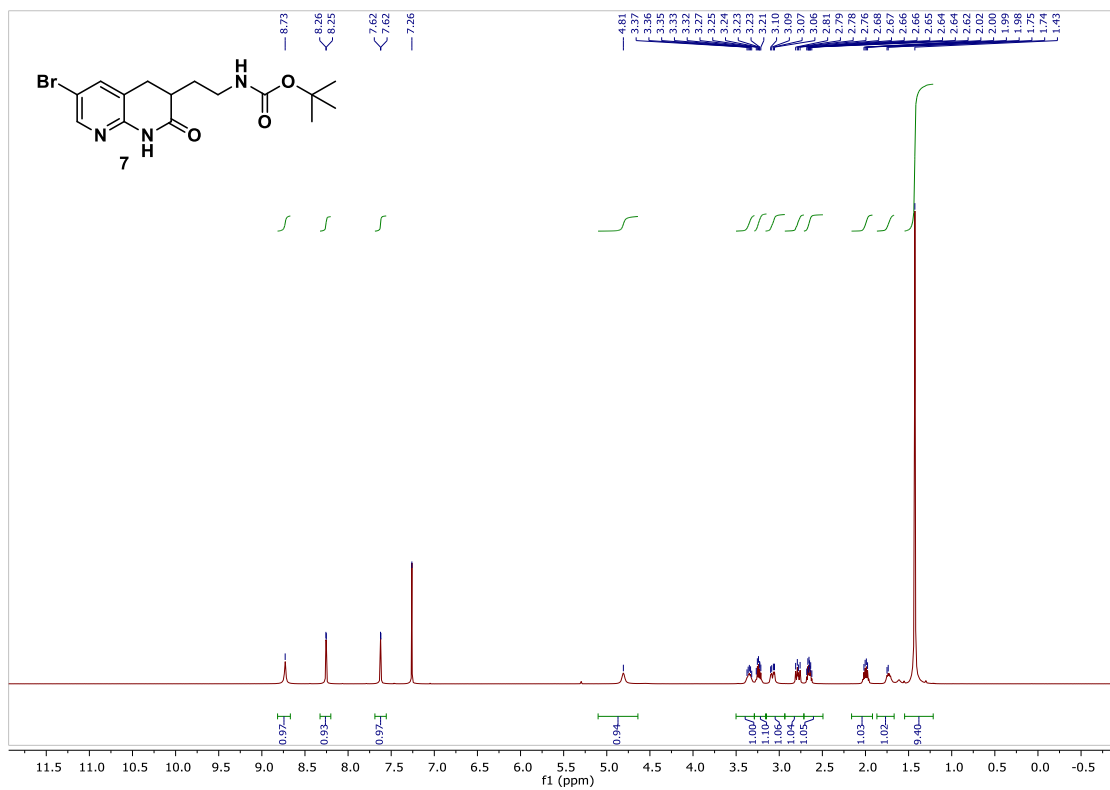

$^{13}\text{C}$  NMR (126 MHz, chloroform-*d*):

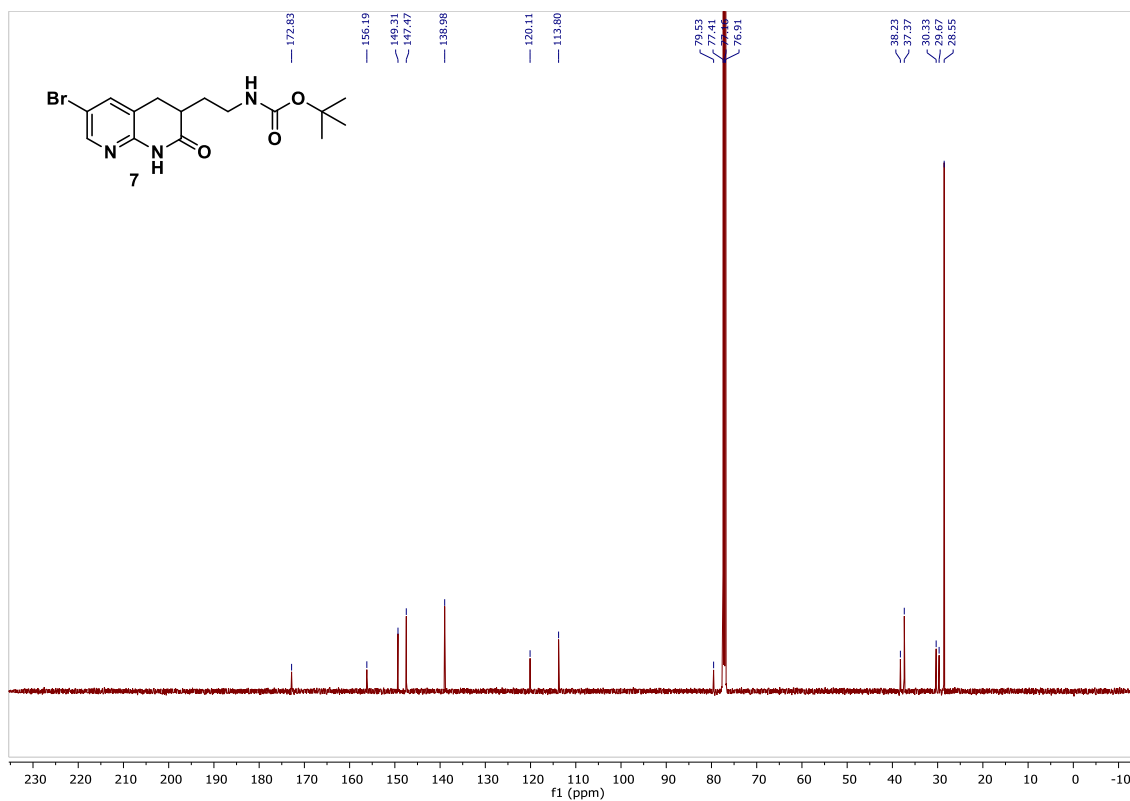

<sup>1</sup>H NMR (600 MHz, DMSO-*d*<sub>6</sub>, 25 °C):

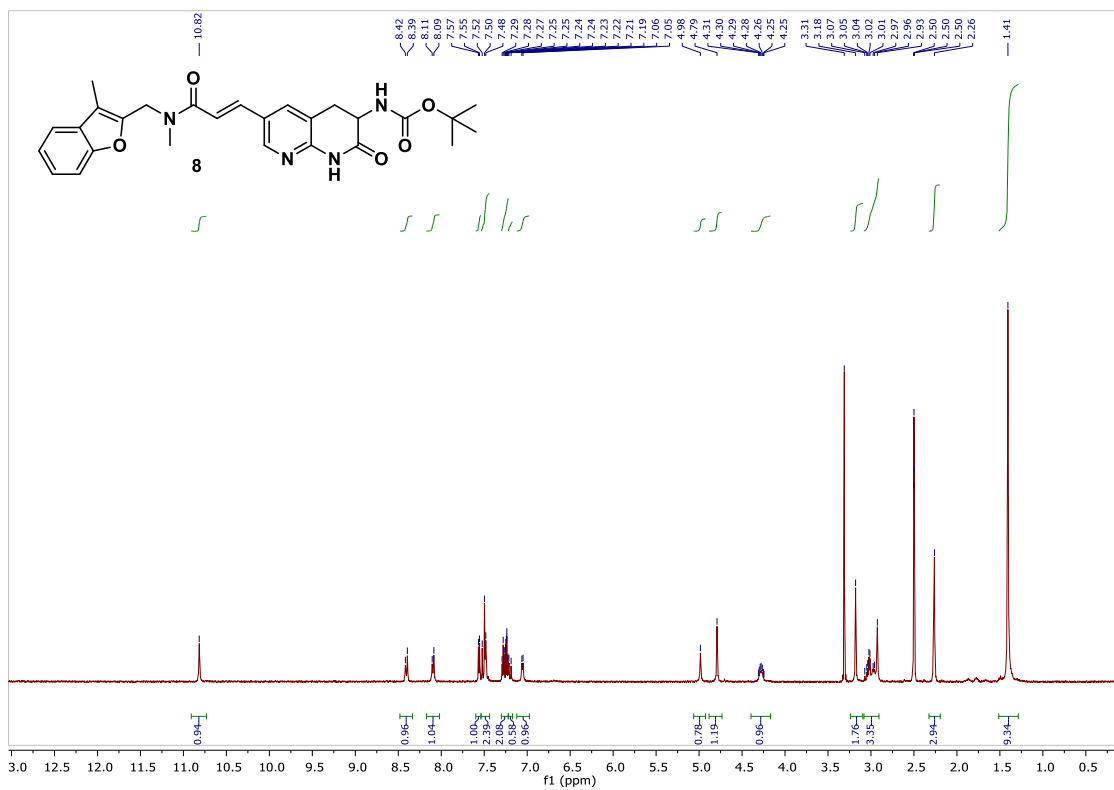

<sup>1</sup>H NMR (600 MHz, DMSO-*d*<sub>6</sub>, 115 °C):

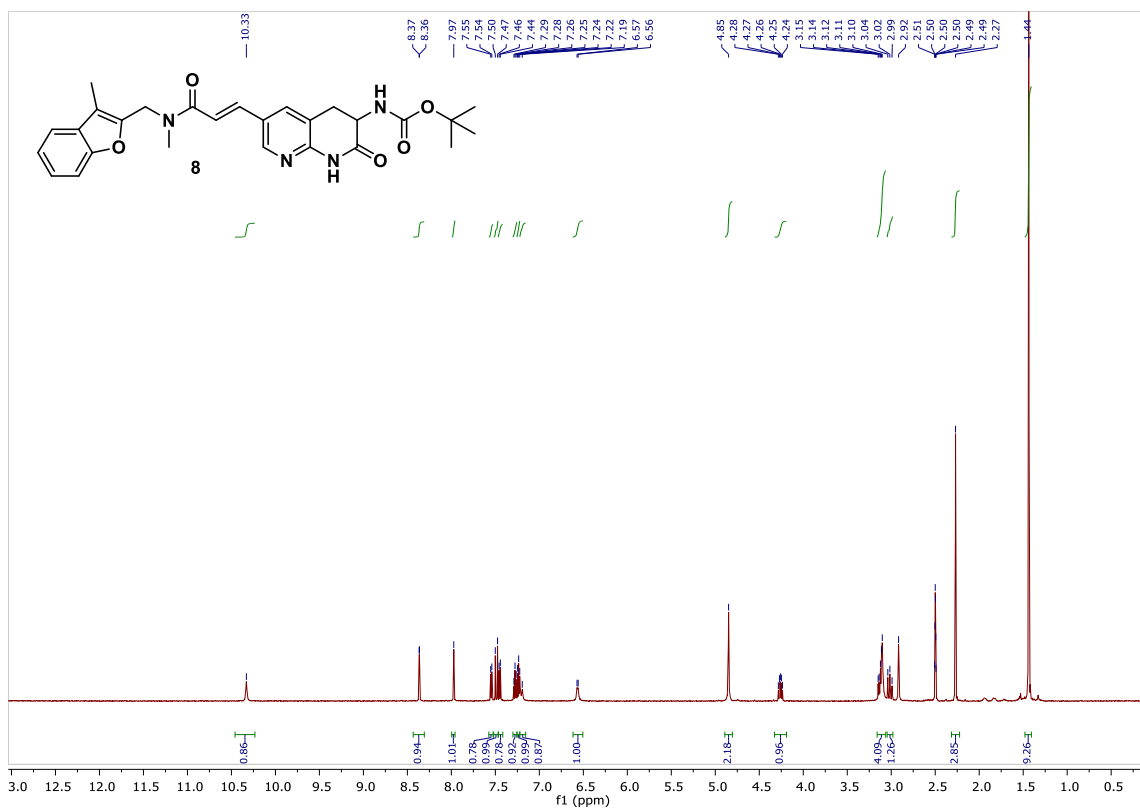

$^{13}\text{C}$  NMR (151 MHz,  $\text{DMSO-}d_6$ , 115  $^\circ\text{C}$ ):

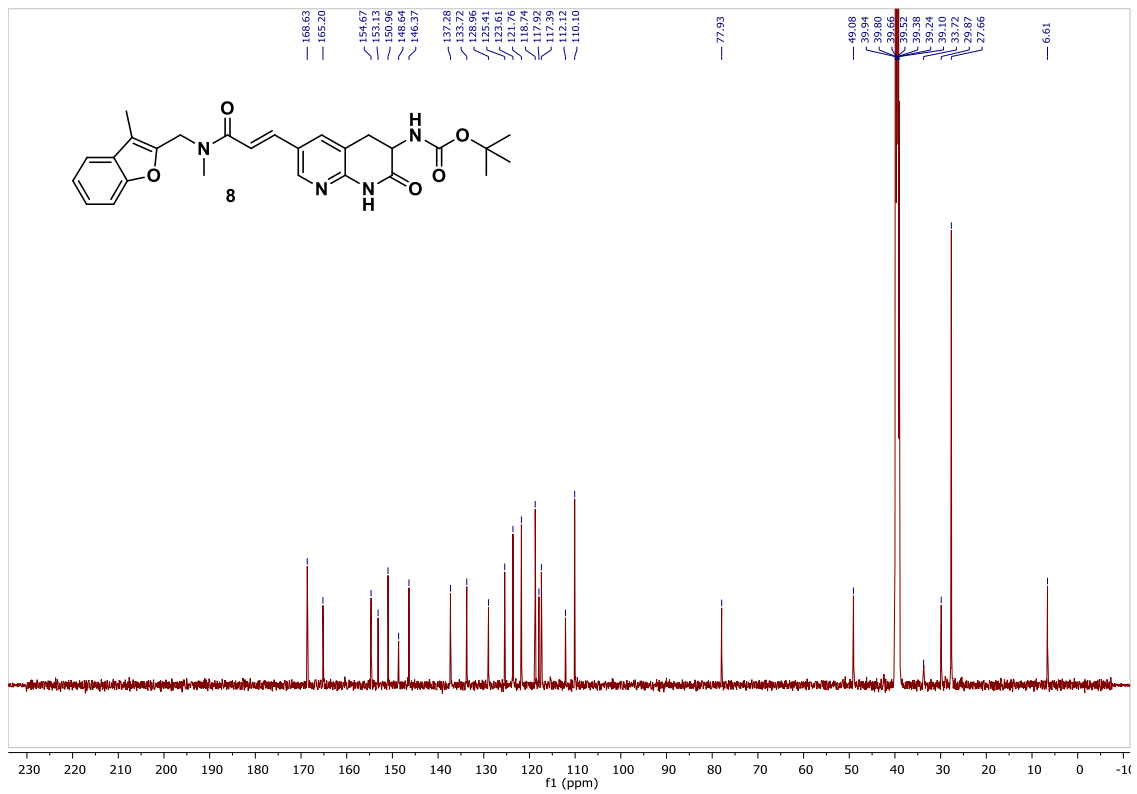

gHSQC (DMSO-*d*<sub>6</sub>, 115 °C):

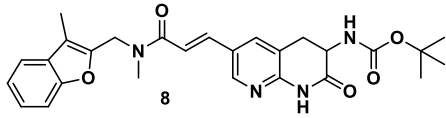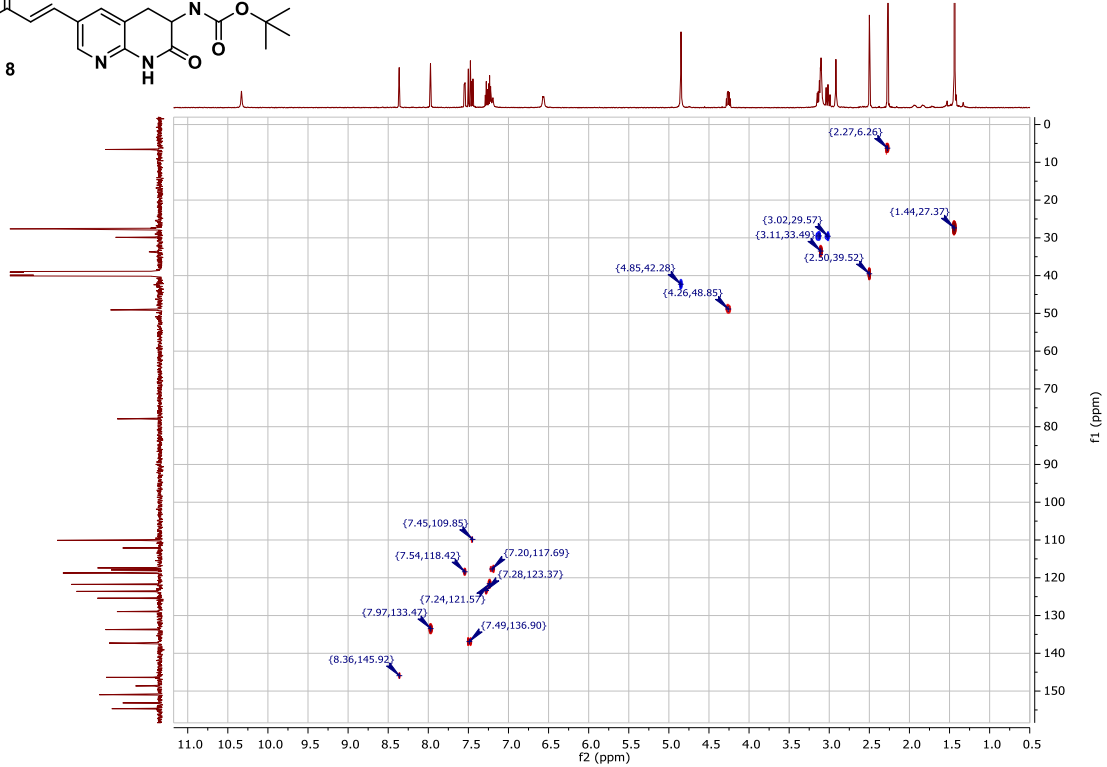

gHSQC (DMSO-*d*<sub>6</sub>, 115 °C):

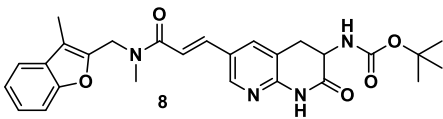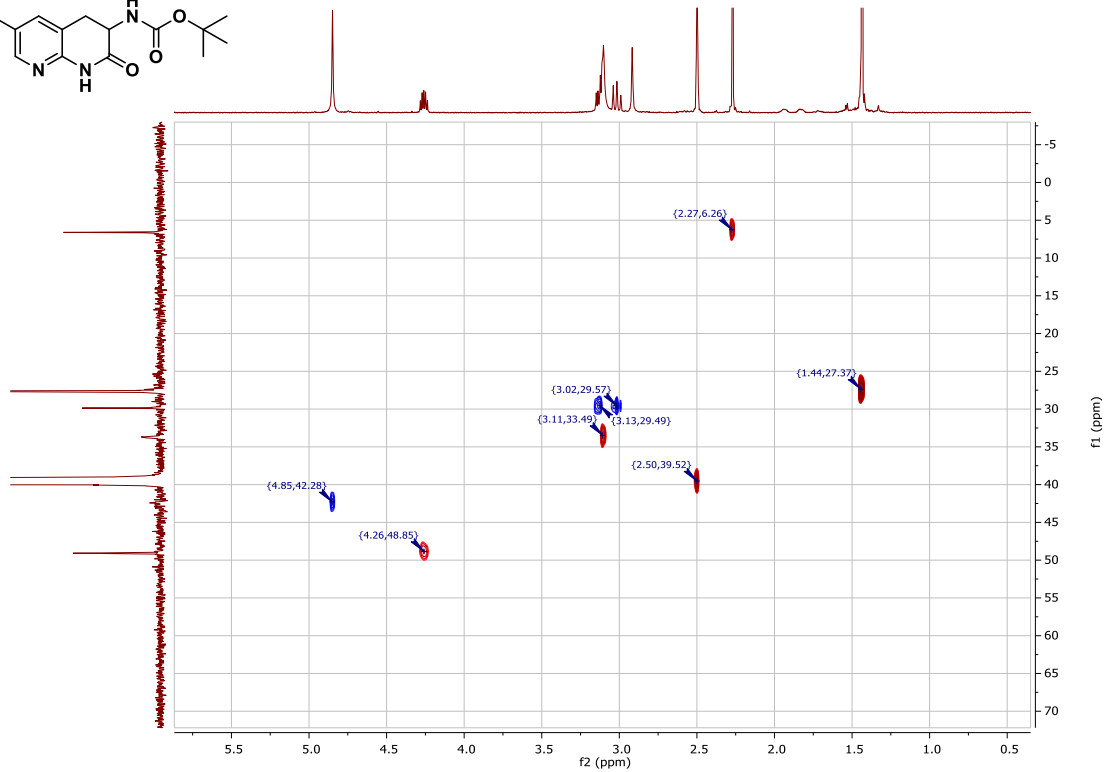

$^1\text{H}$  NMR (600 MHz,  $\text{DMSO-}d_6$ , 25  $^\circ\text{C}$ ):

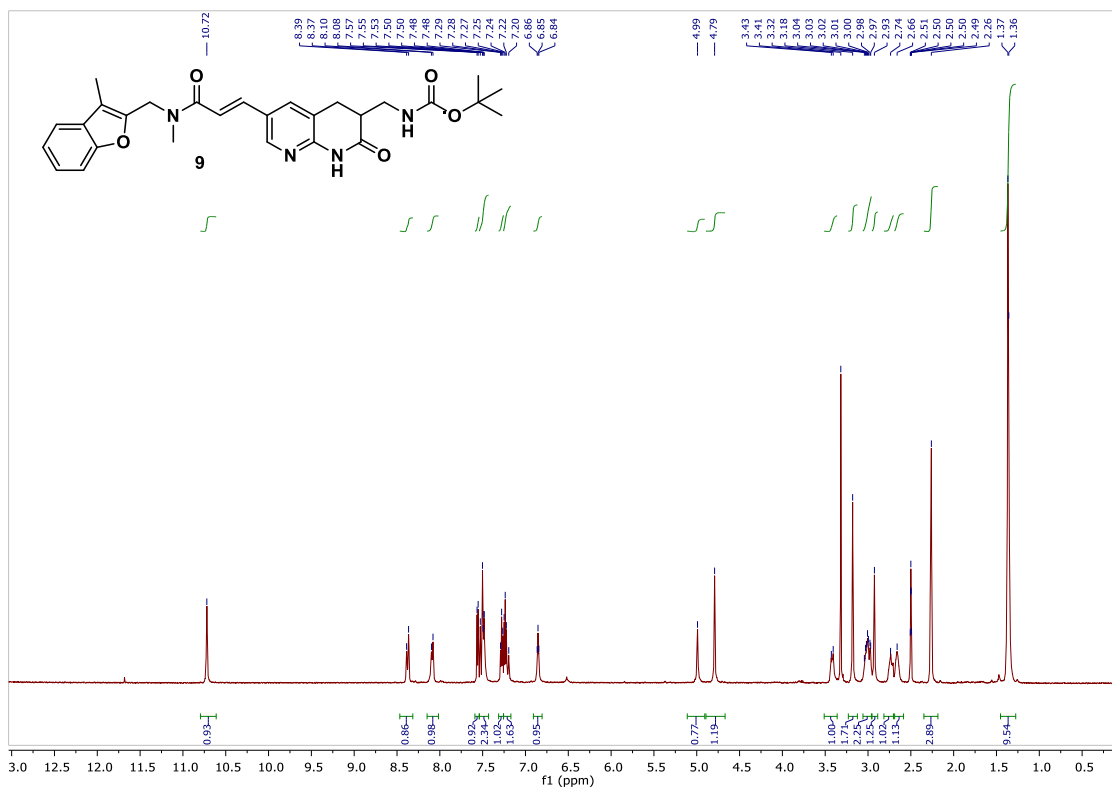

$^1\text{H}$  NMR (600 MHz,  $\text{DMSO-}d_6$ , 120  $^\circ\text{C}$ ):

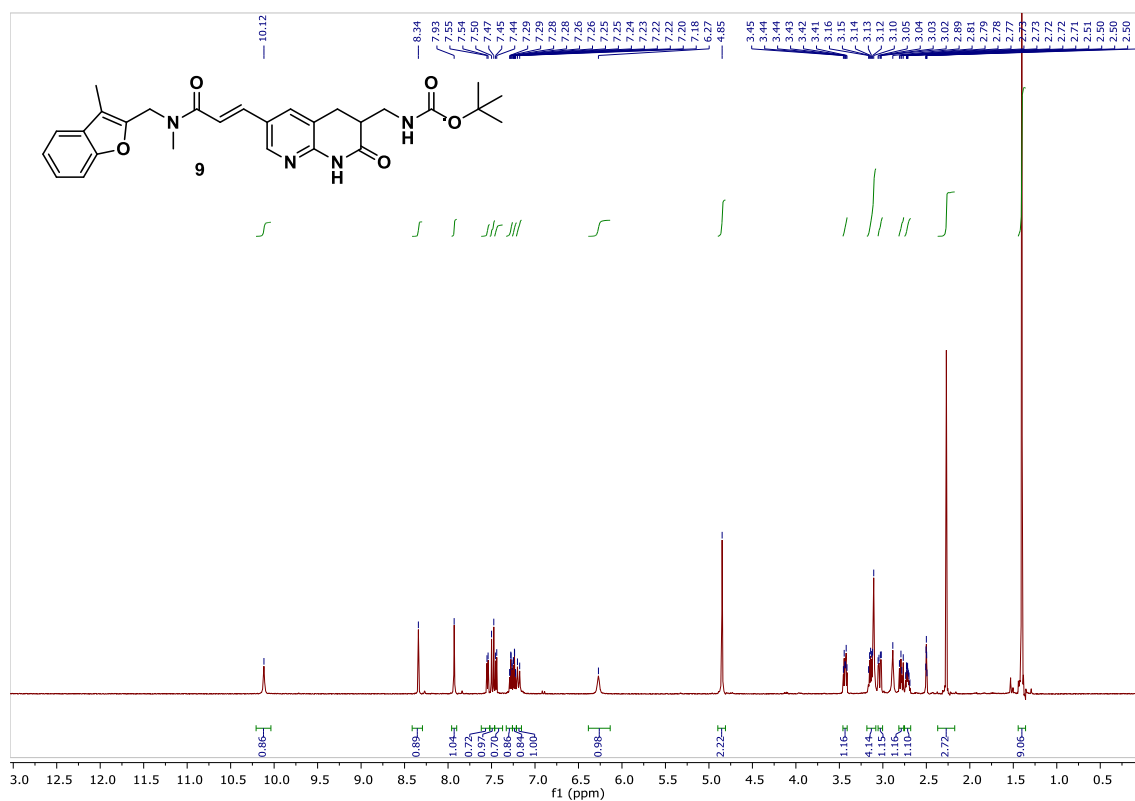

$^{13}\text{C}$  NMR (151 MHz,  $\text{DMSO-}d_6$ , 120  $^\circ\text{C}$ ):

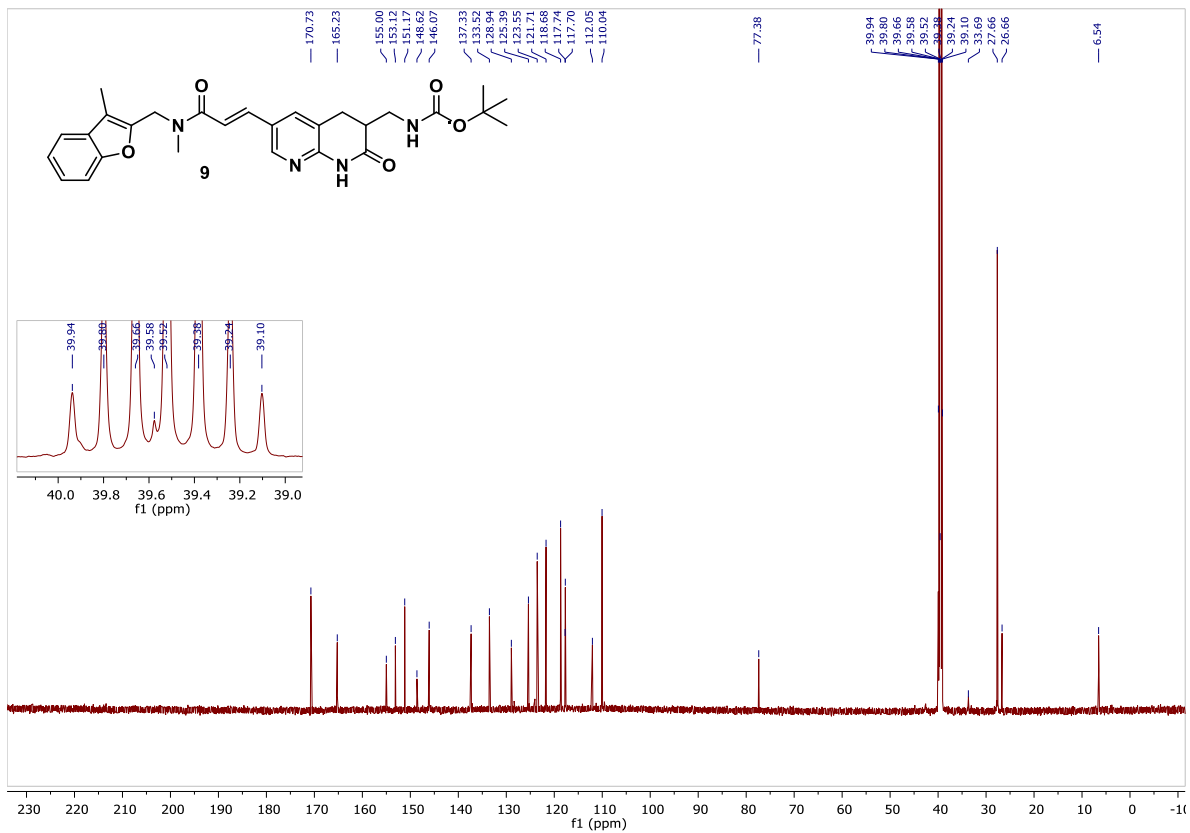



gHSQC (DMSO-*d*<sub>6</sub>, 115 °C):

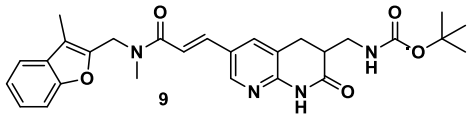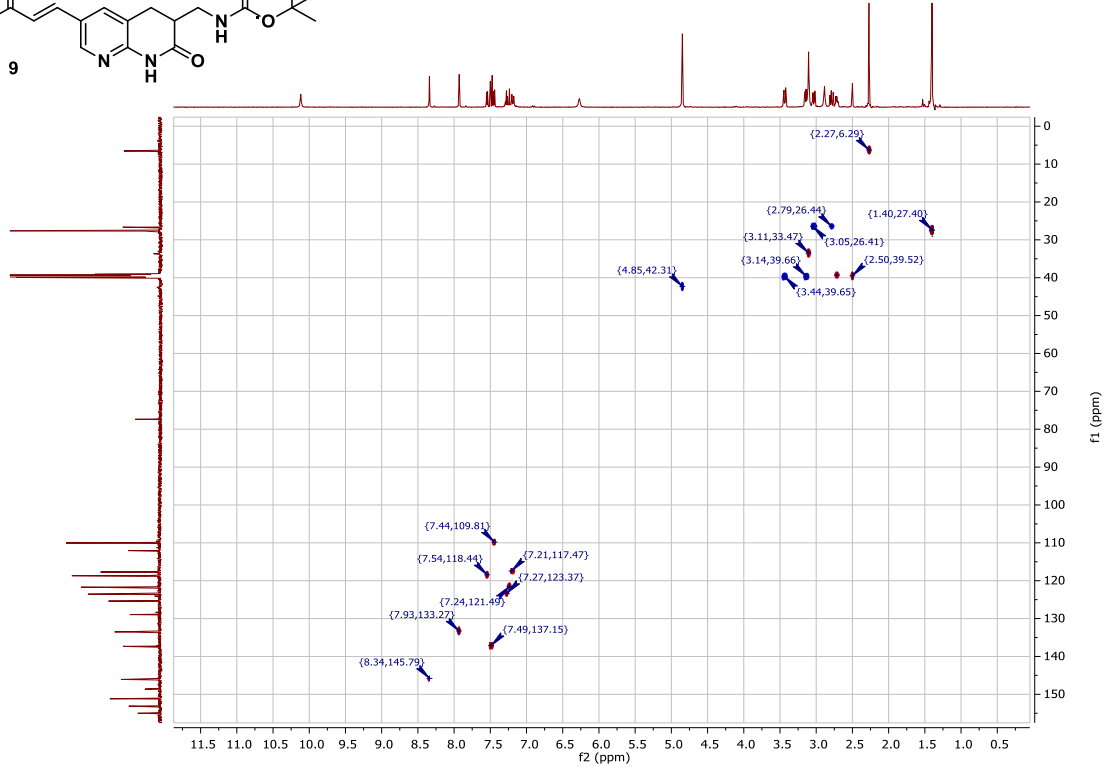

gHSQC (DMSO-*d*<sub>6</sub>, 115 °C):

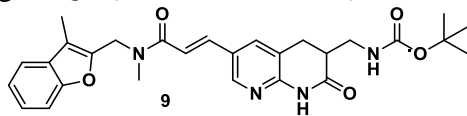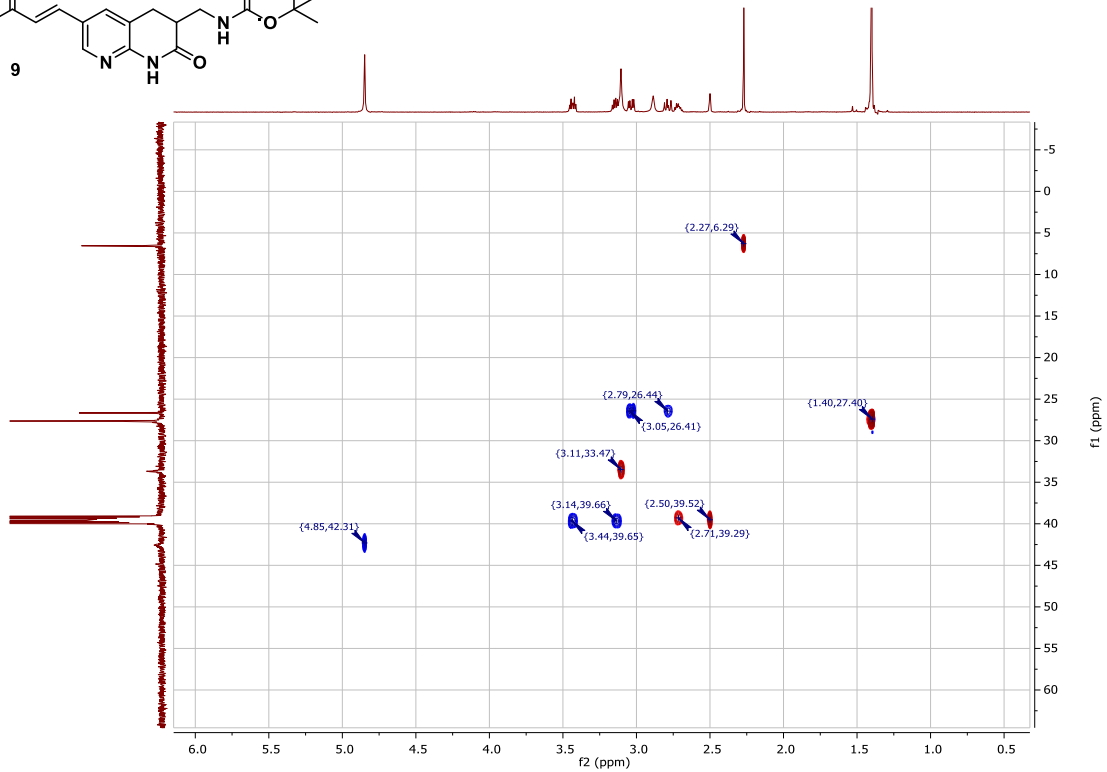

$^1\text{H}$  NMR (600 MHz,  $\text{DMSO-}d_6$ , 25 °C):

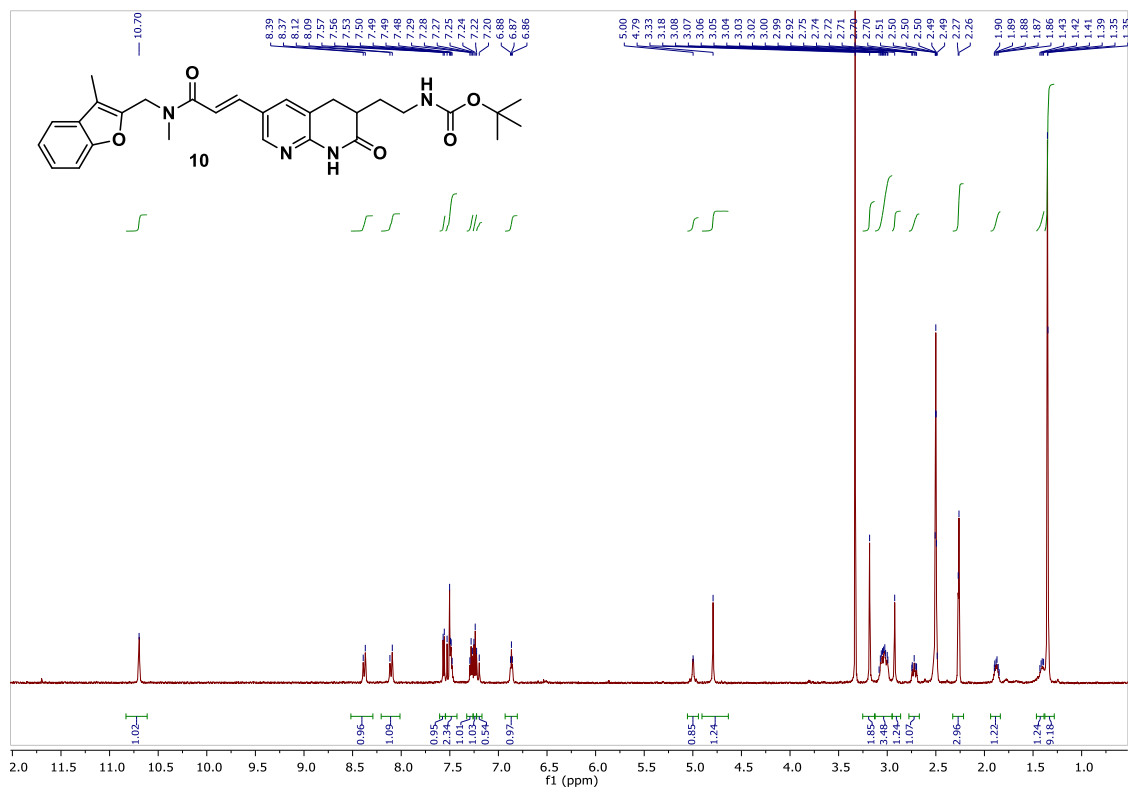

$^1\text{H}$  NMR (600 MHz,  $\text{DMSO-}d_6$ , 120 °C):

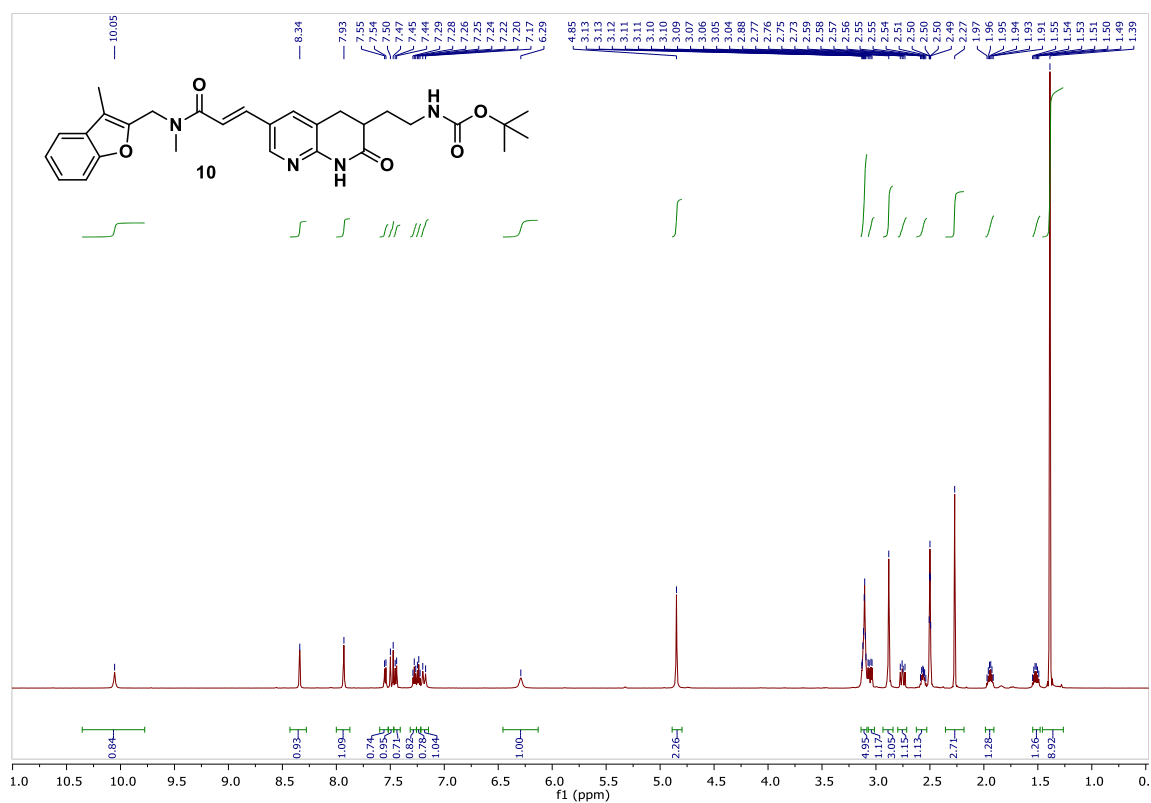

$^{13}\text{C}$  NMR (151 MHz, DMSO- $d_6$ , 120 °C):

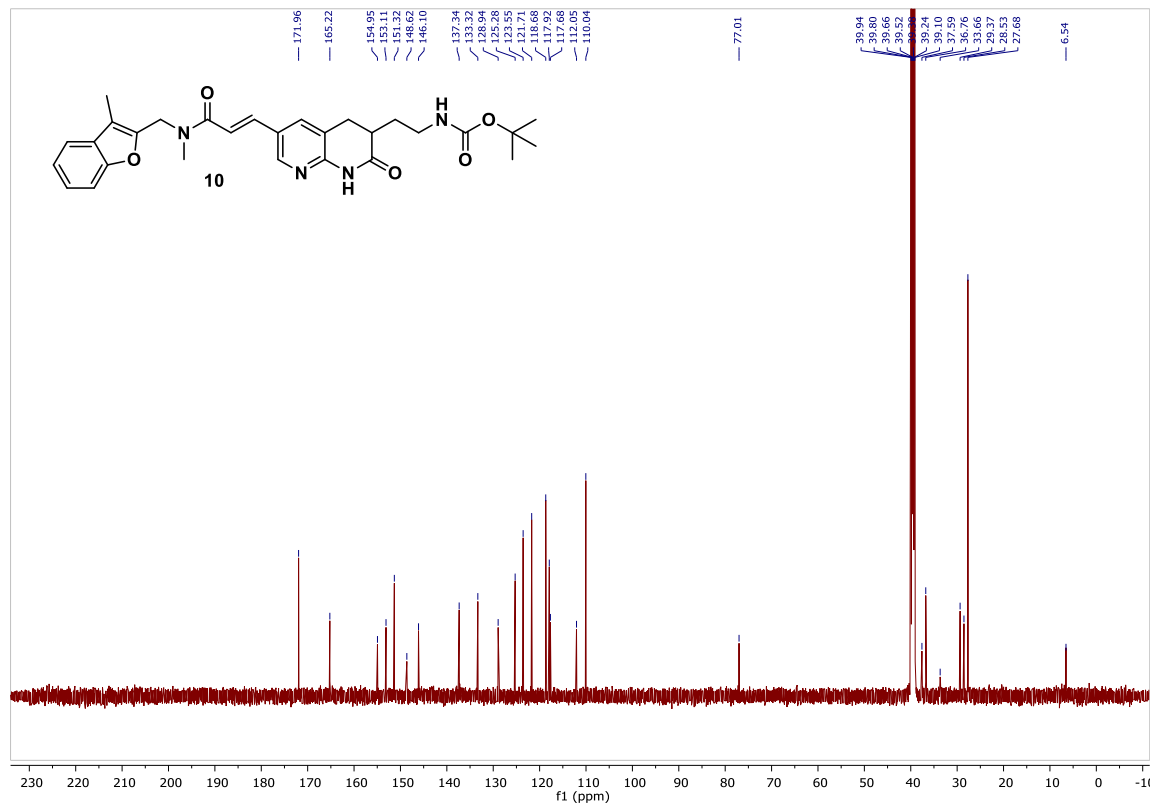

gHSQC (DMSO-*d*<sub>6</sub>, 115°C):

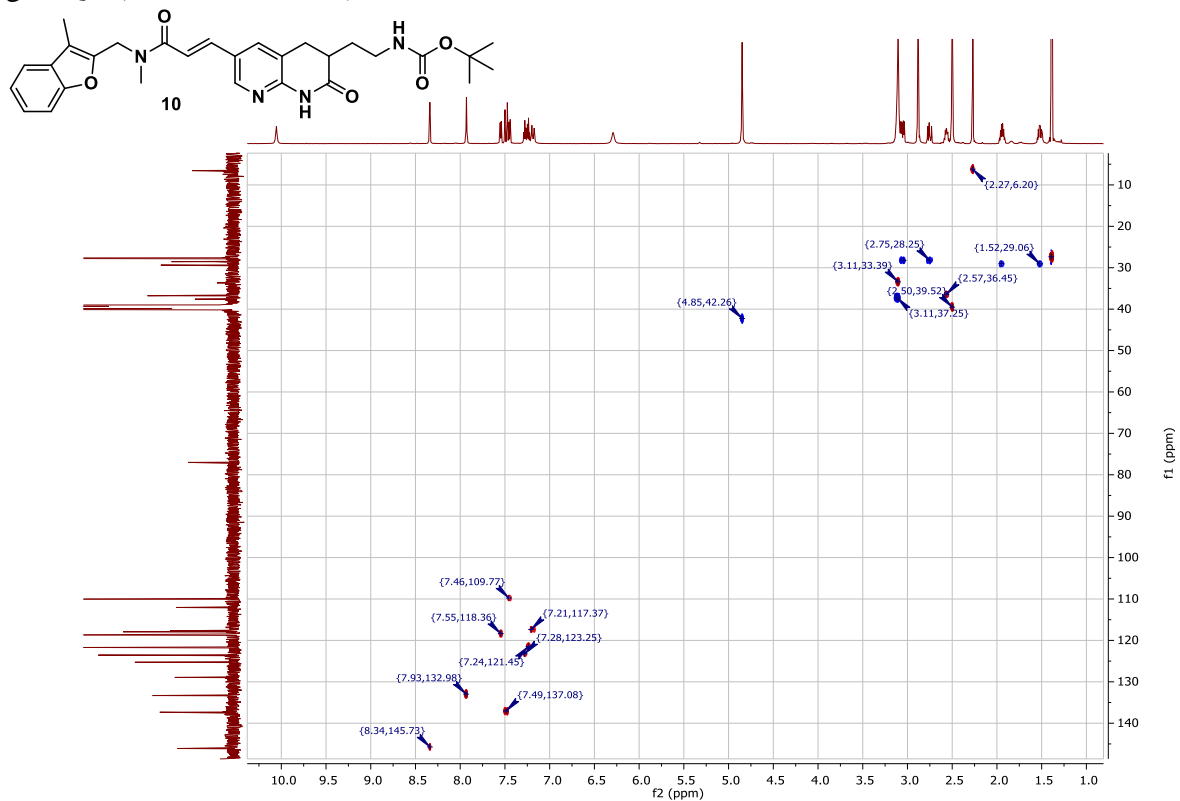

gHSQC (DMSO-*d*<sub>6</sub>, 115 °C):

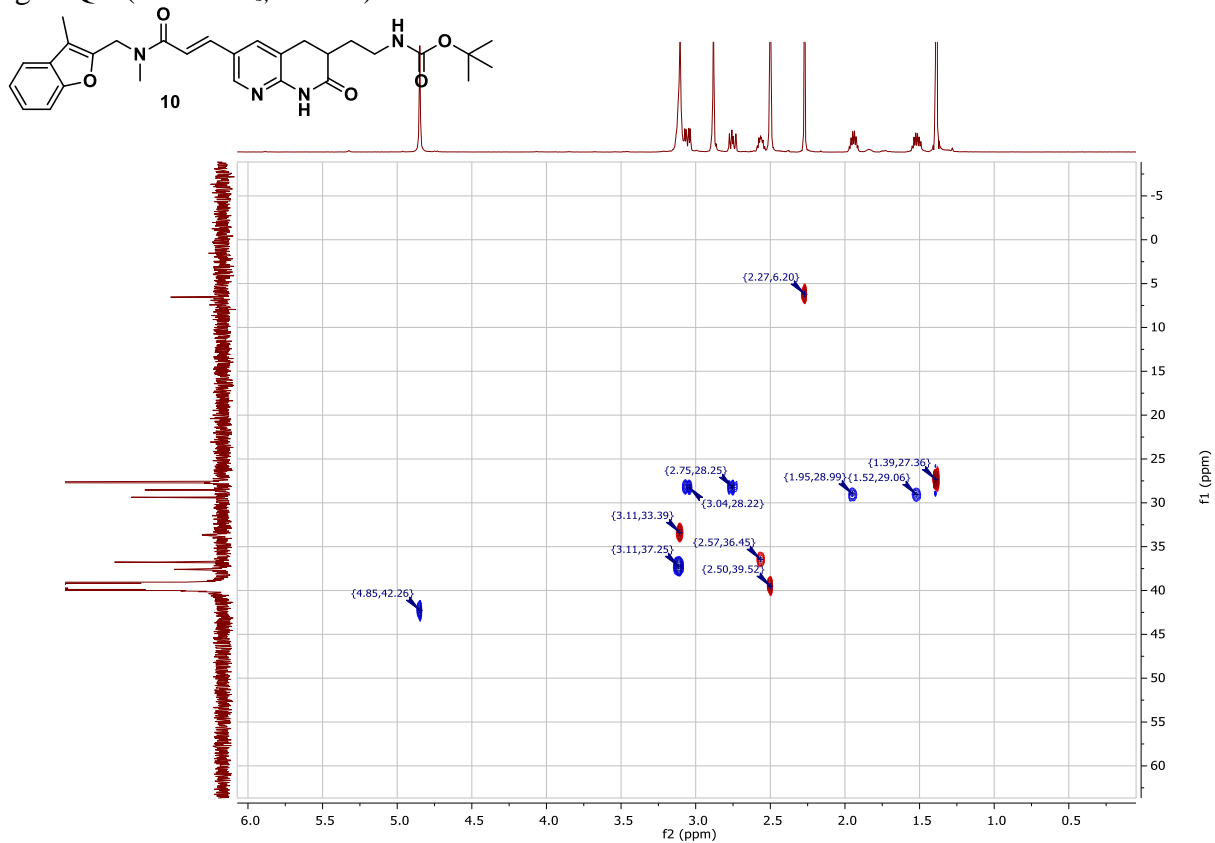

$^1\text{H}$  NMR (600 MHz,  $\text{DMSO-}d_6$ , 25  $^\circ\text{C}$ ):

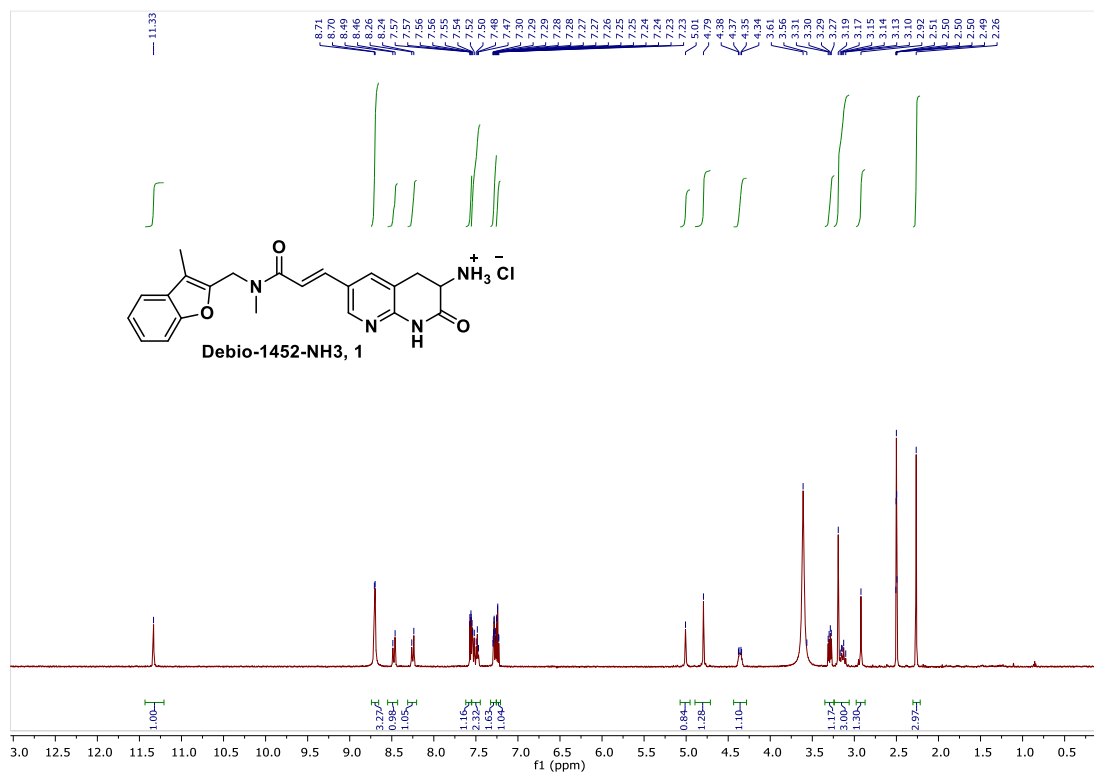

$^1\text{H}$  NMR (600 MHz,  $\text{DMSO-}d_6$ , 120  $^\circ\text{C}$ ):

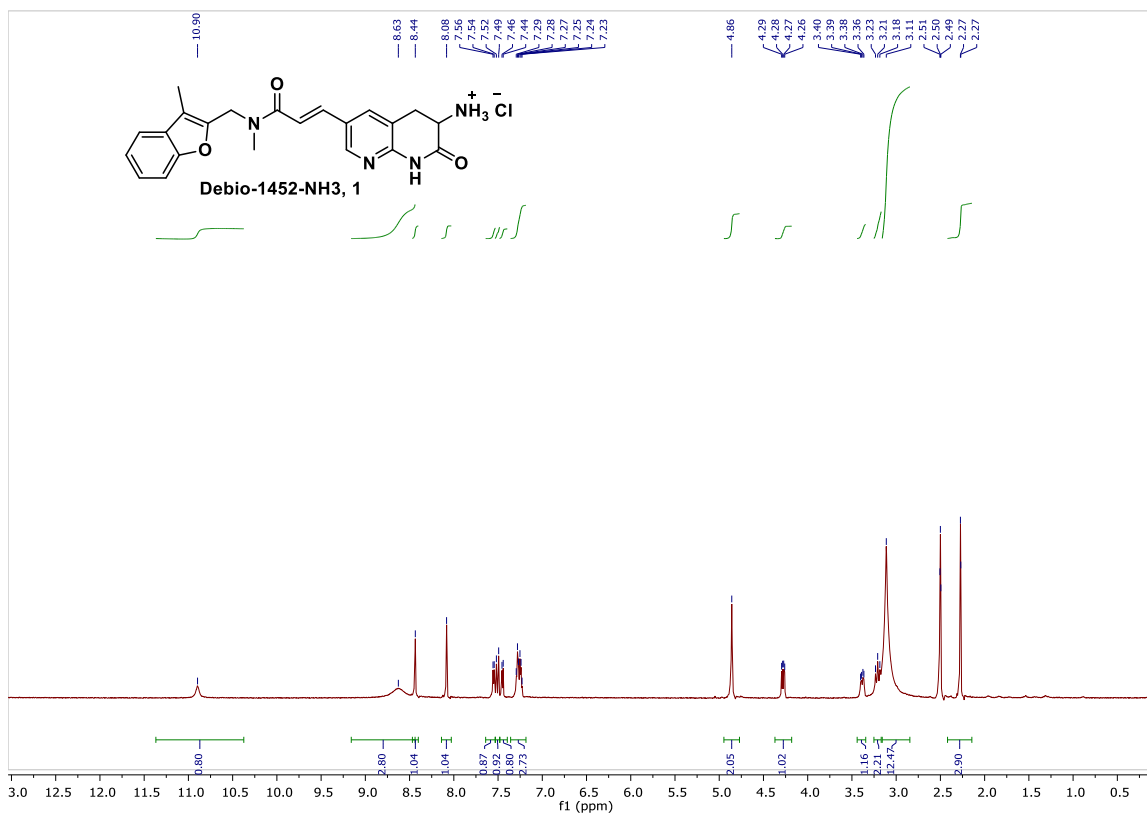

$^{13}\text{C}$  NMR (151 MHz,  $\text{DMSO-}d_6$ , 120  $^\circ\text{C}$ ):

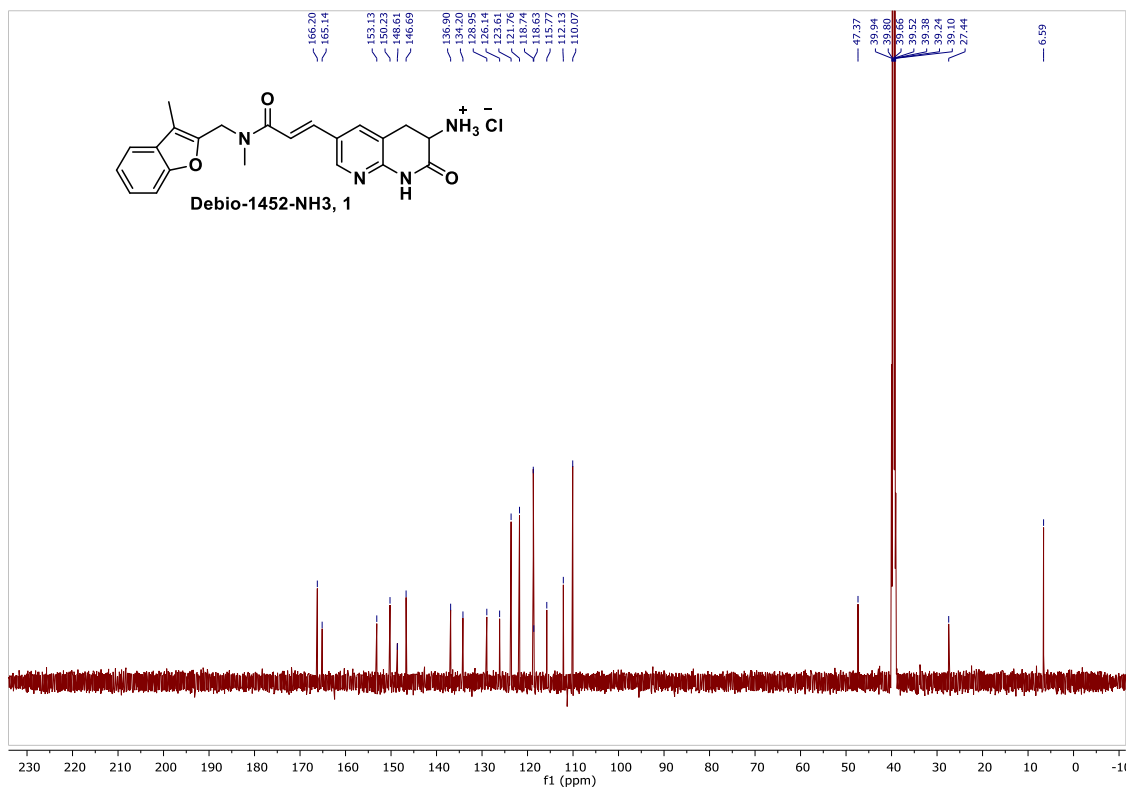

gHSQC (DMSO-*d*<sub>6</sub>, 115 °C):

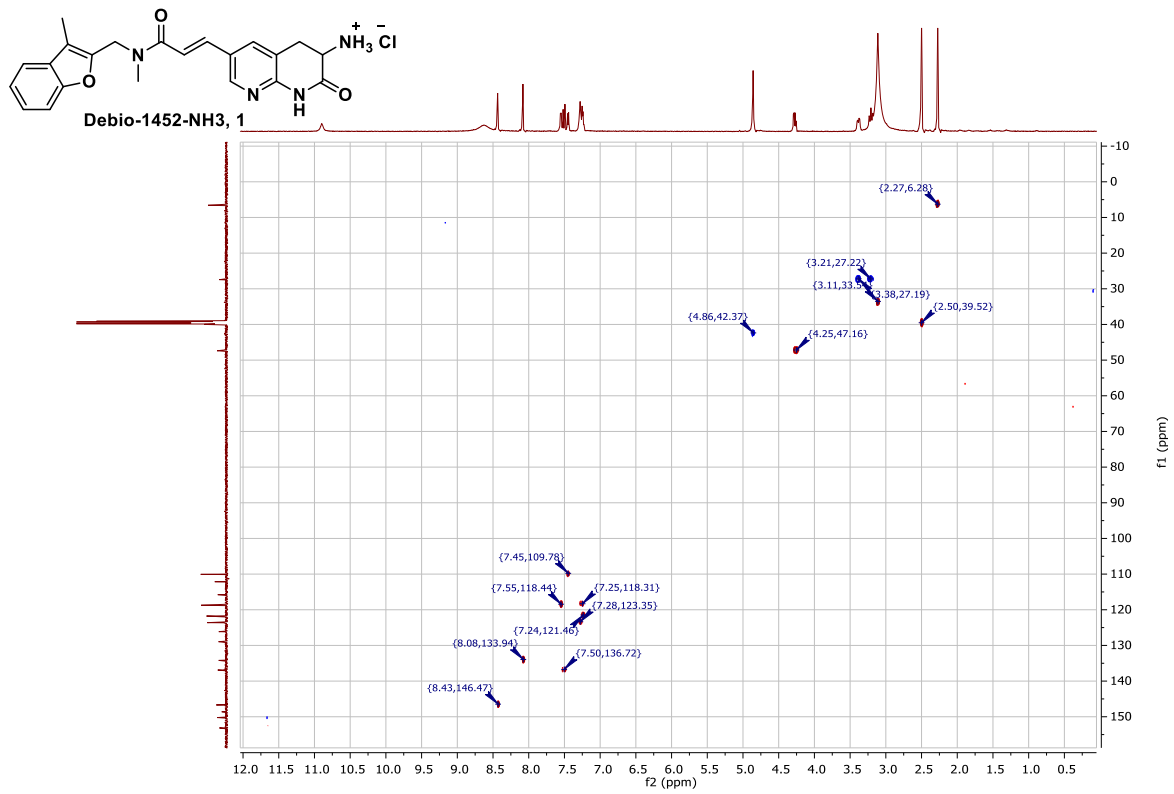

gHSQC (DMSO-*d*<sub>6</sub>, 115 °C):

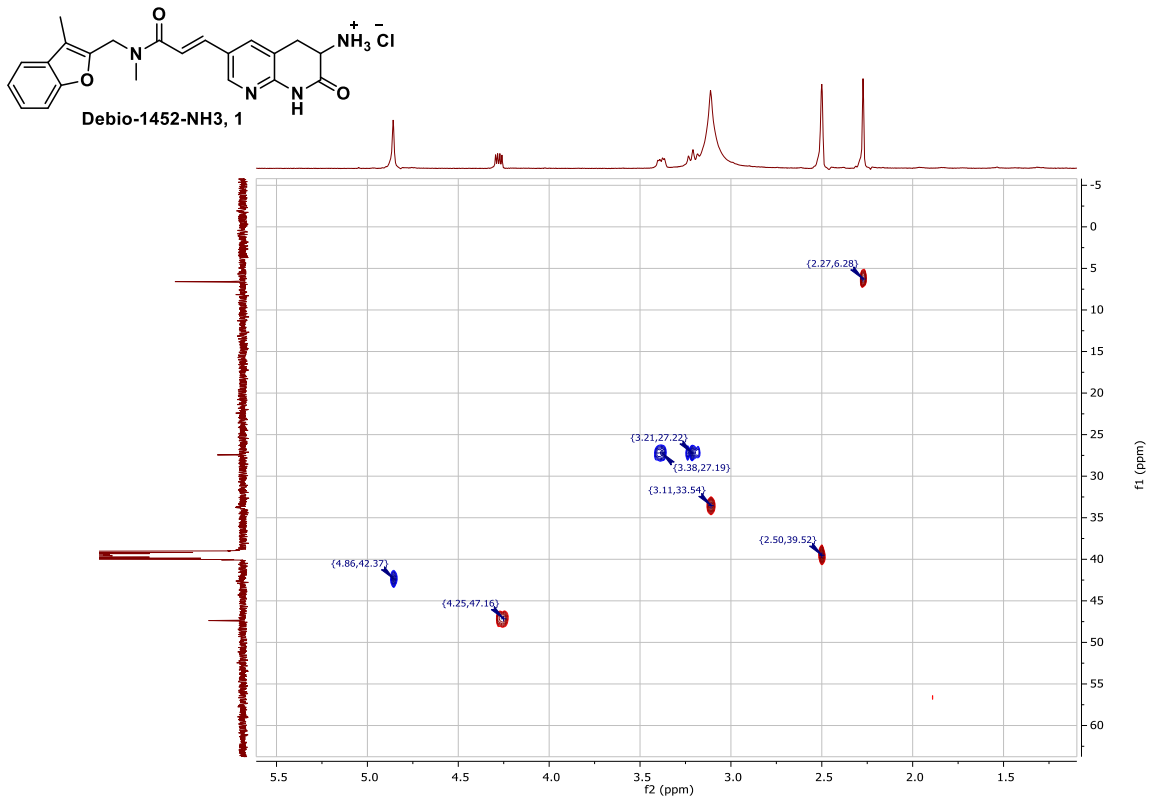

$^1\text{H}$  NMR (600 MHz,  $\text{DMSO-}d_6$ , 25  $^\circ\text{C}$ ):

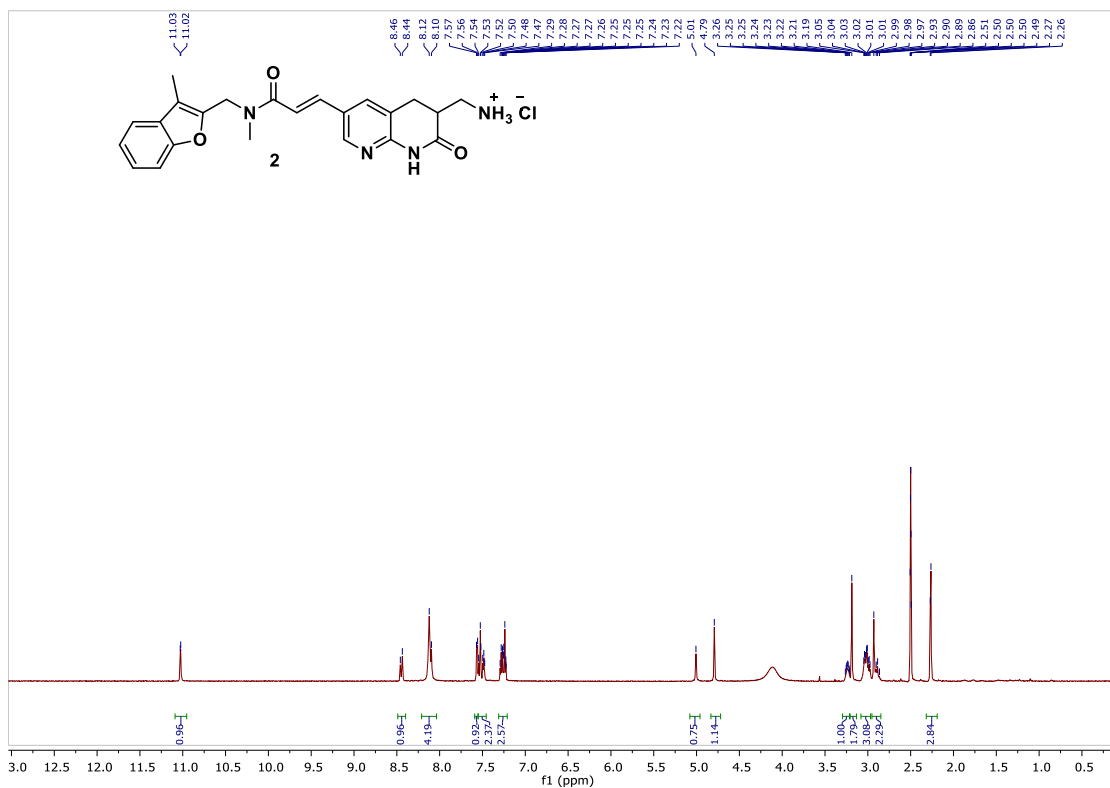

$^1\text{H}$  NMR (600 MHz,  $\text{DMSO-}d_6$ , 120  $^\circ\text{C}$ ):

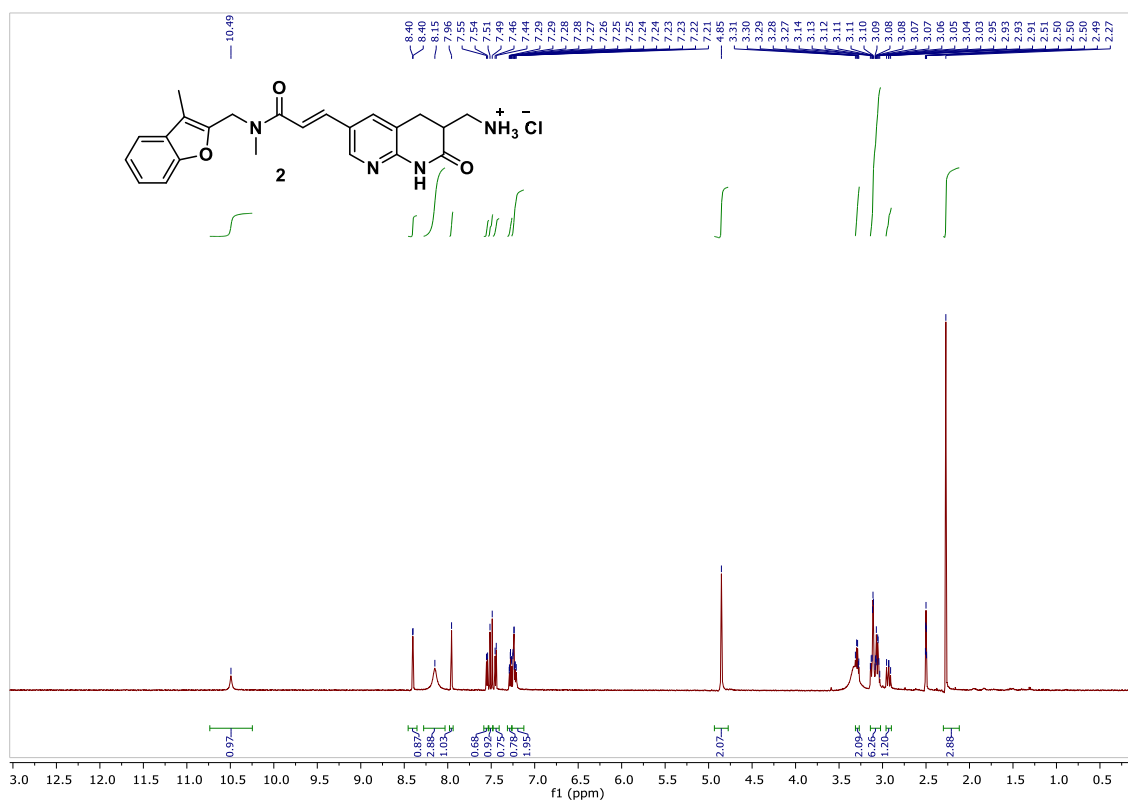



$^{13}\text{C}$  NMR (151 MHz, DMSO- $d_6$ , 120 °C):

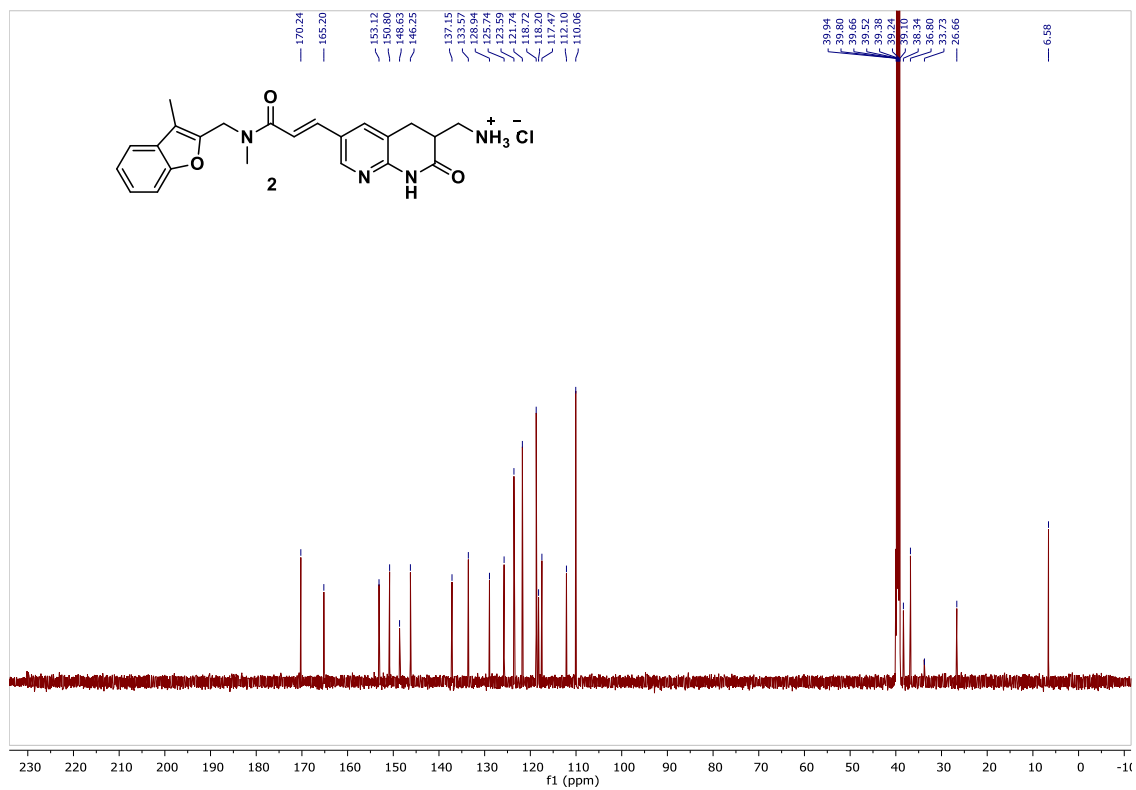

gHSQC (DMSO-*d*<sub>6</sub>, 115 °C):

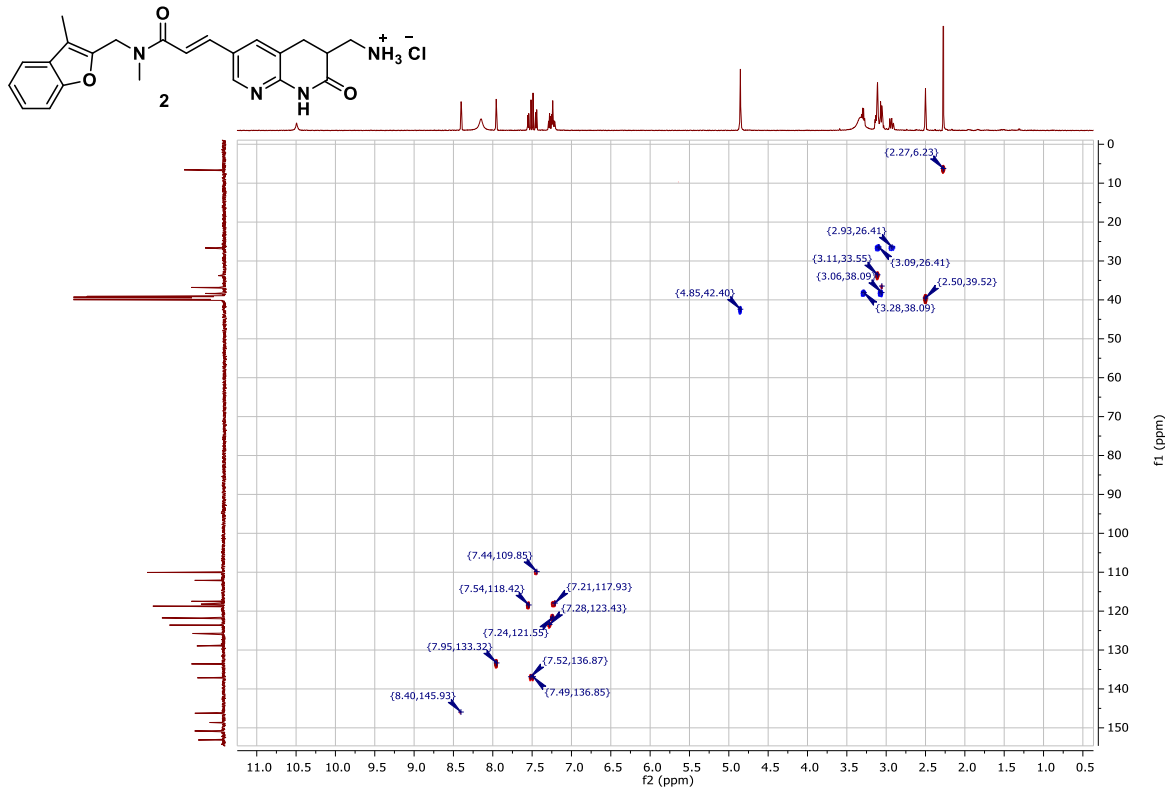

gHSQC (DMSO-*d*<sub>6</sub>, 115 °C):

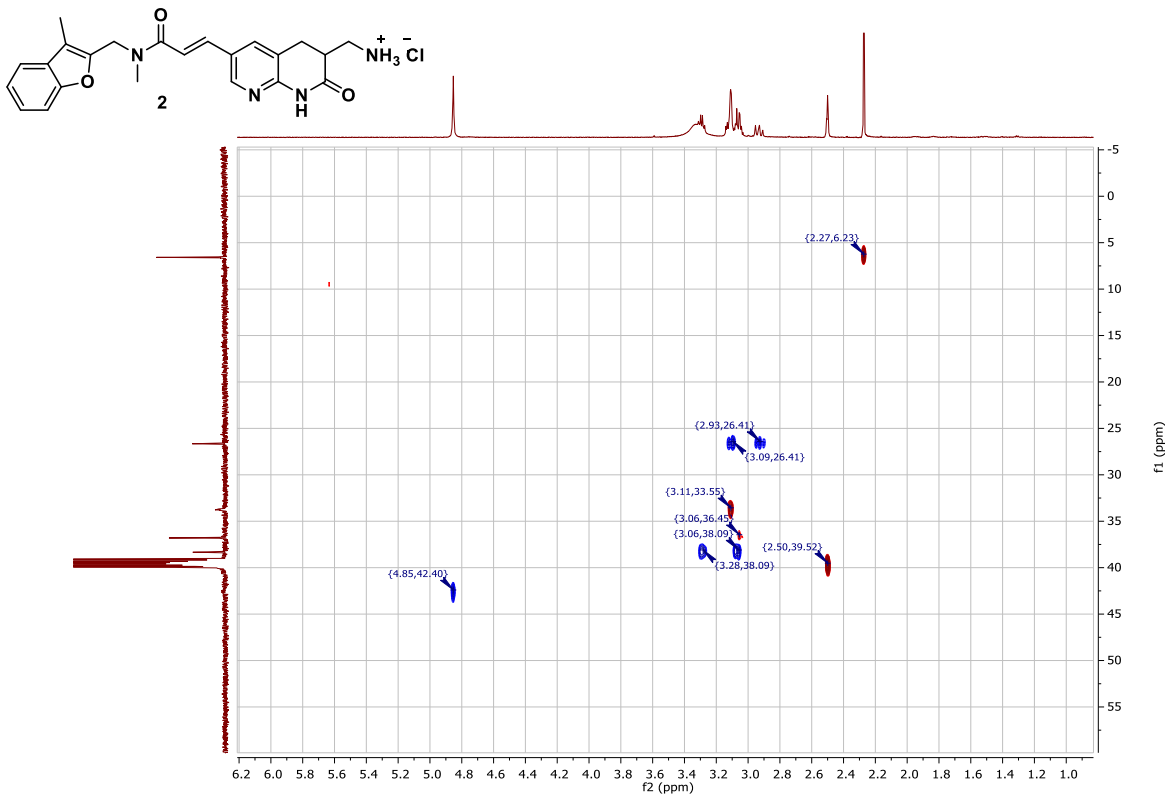

$^1\text{H}$  NMR (600 MHz,  $\text{DMSO-}d_6$ , 25 °C):

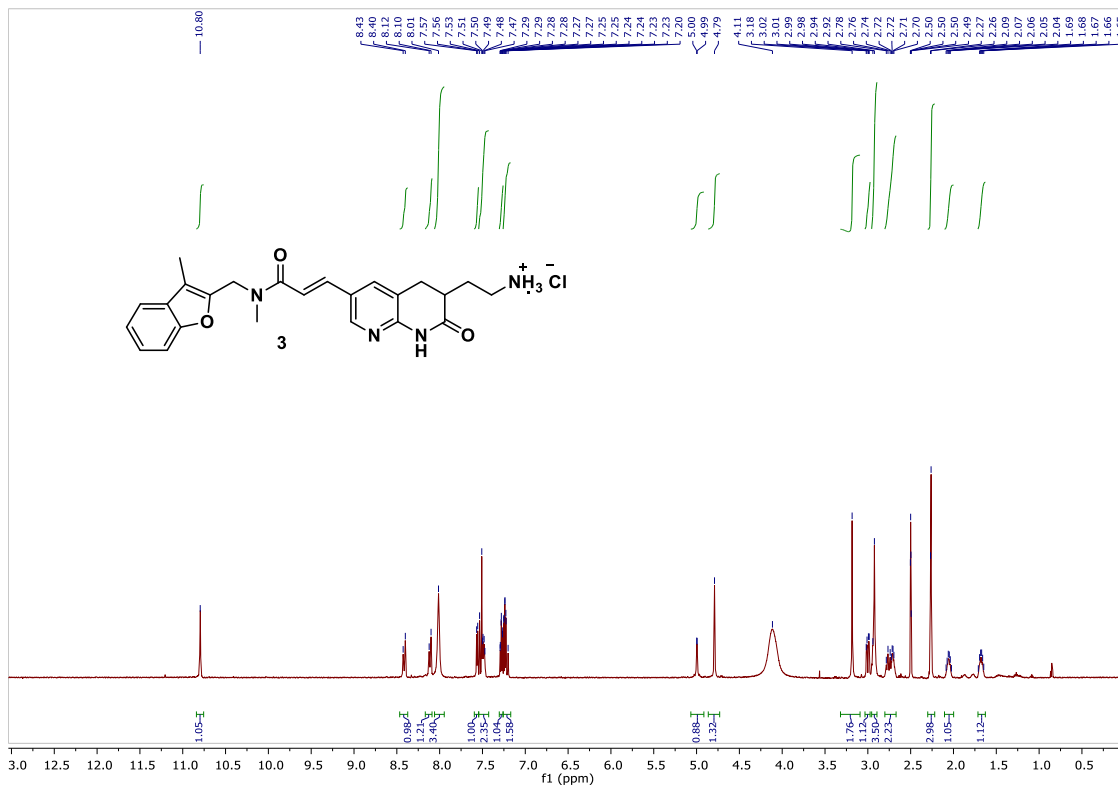

$^1\text{H}$  NMR (600 MHz,  $\text{DMSO-}d_6$ , 115 °C):

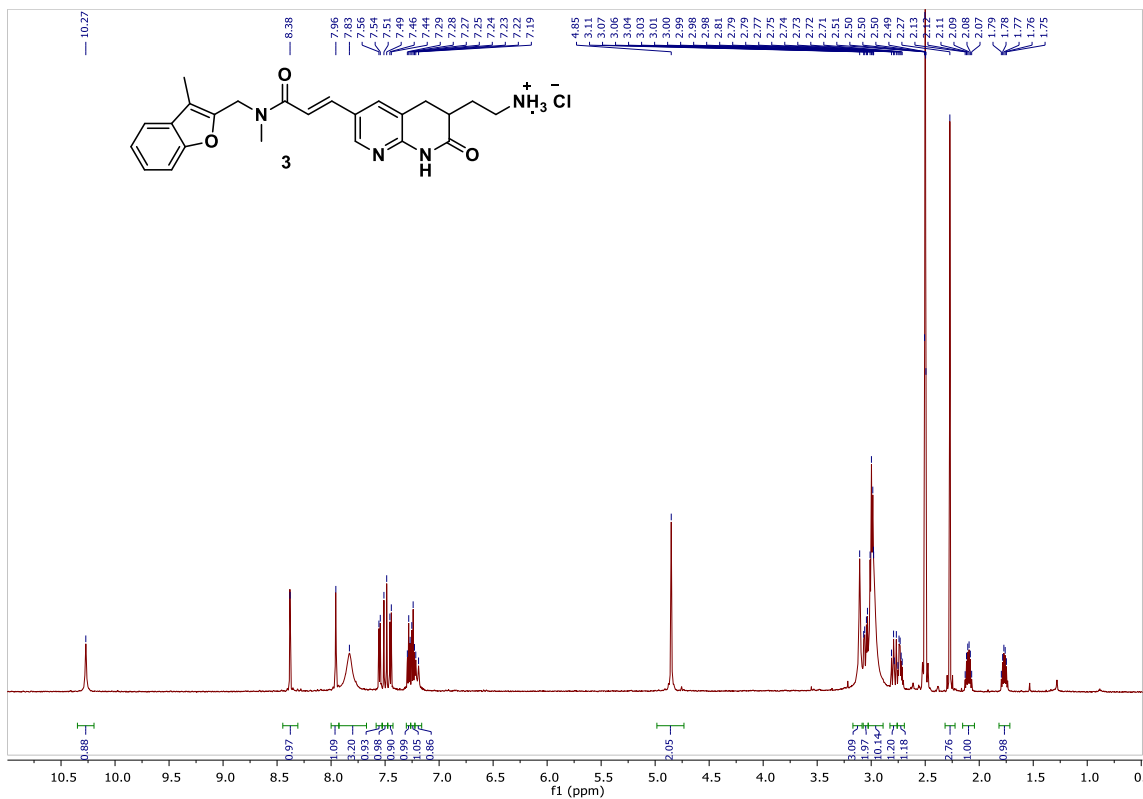

$^{13}\text{C}$  NMR (151 MHz,  $\text{DMSO-}d_6$ , 115  $^\circ\text{C}$ ):

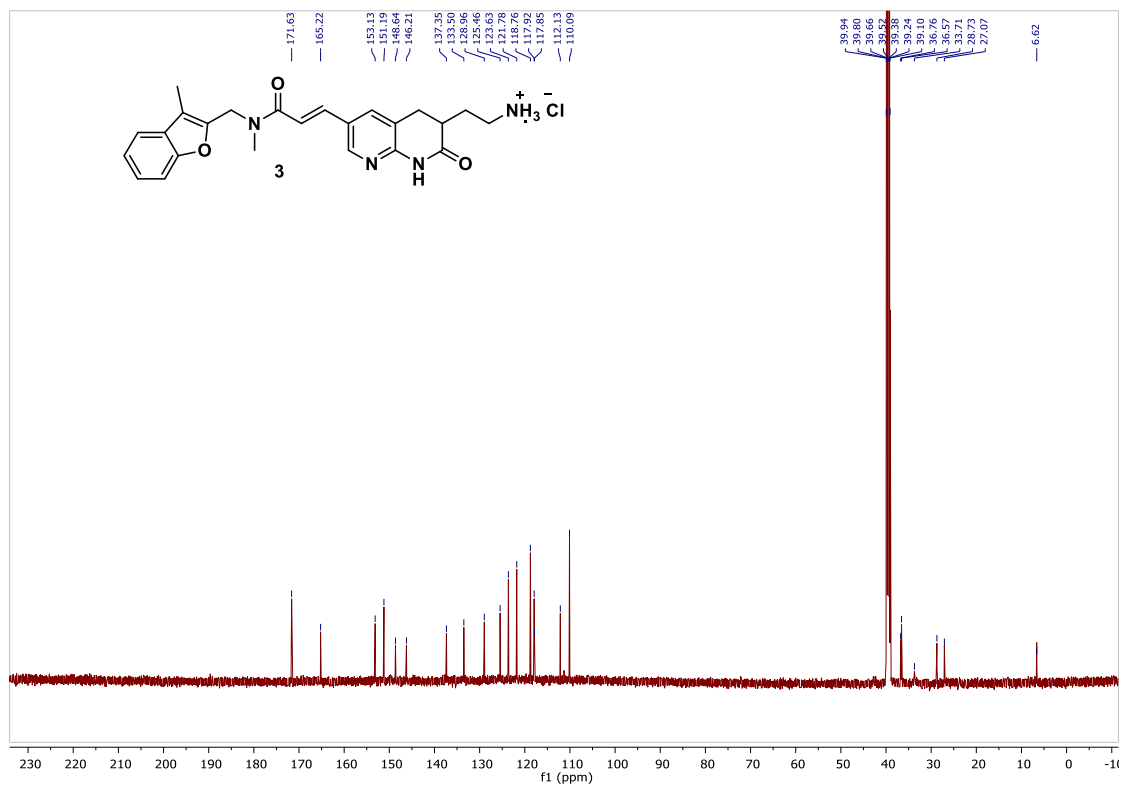

gHSQC (DMSO-*d*<sub>6</sub>, 115 °C):

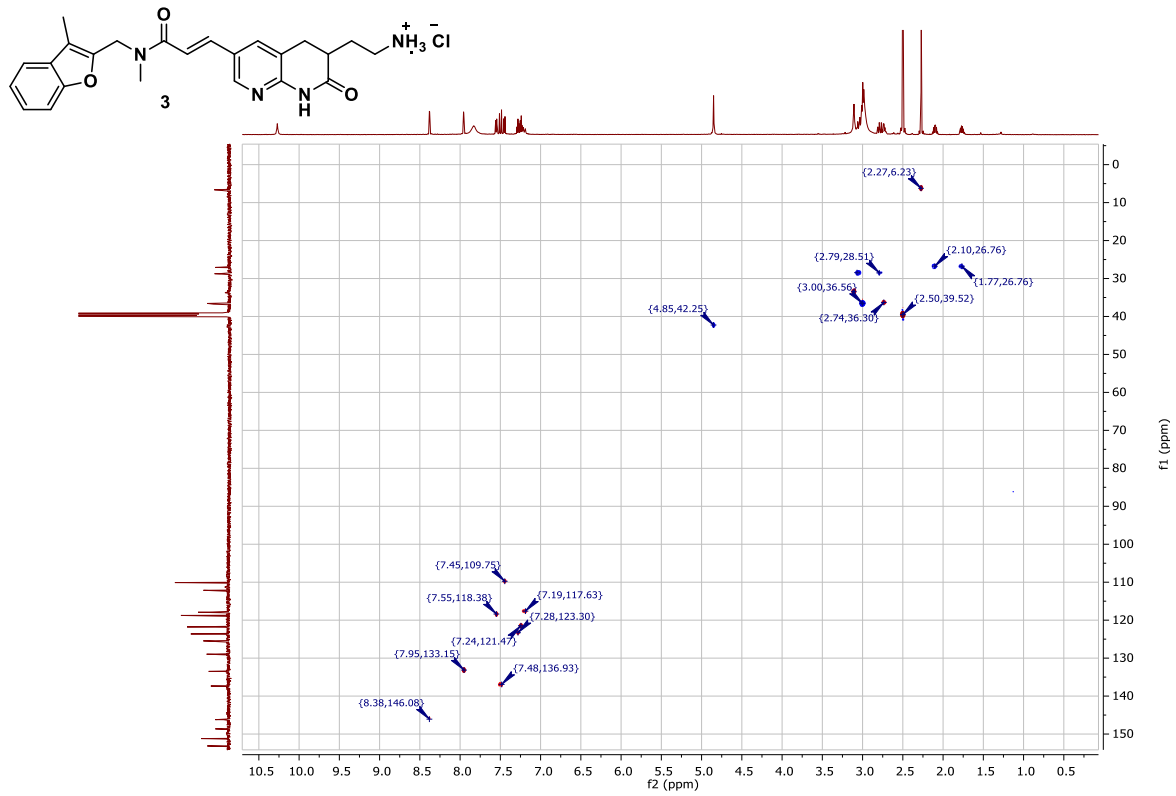

gHSQC (DMSO-*d*<sub>6</sub>, 115 °C):

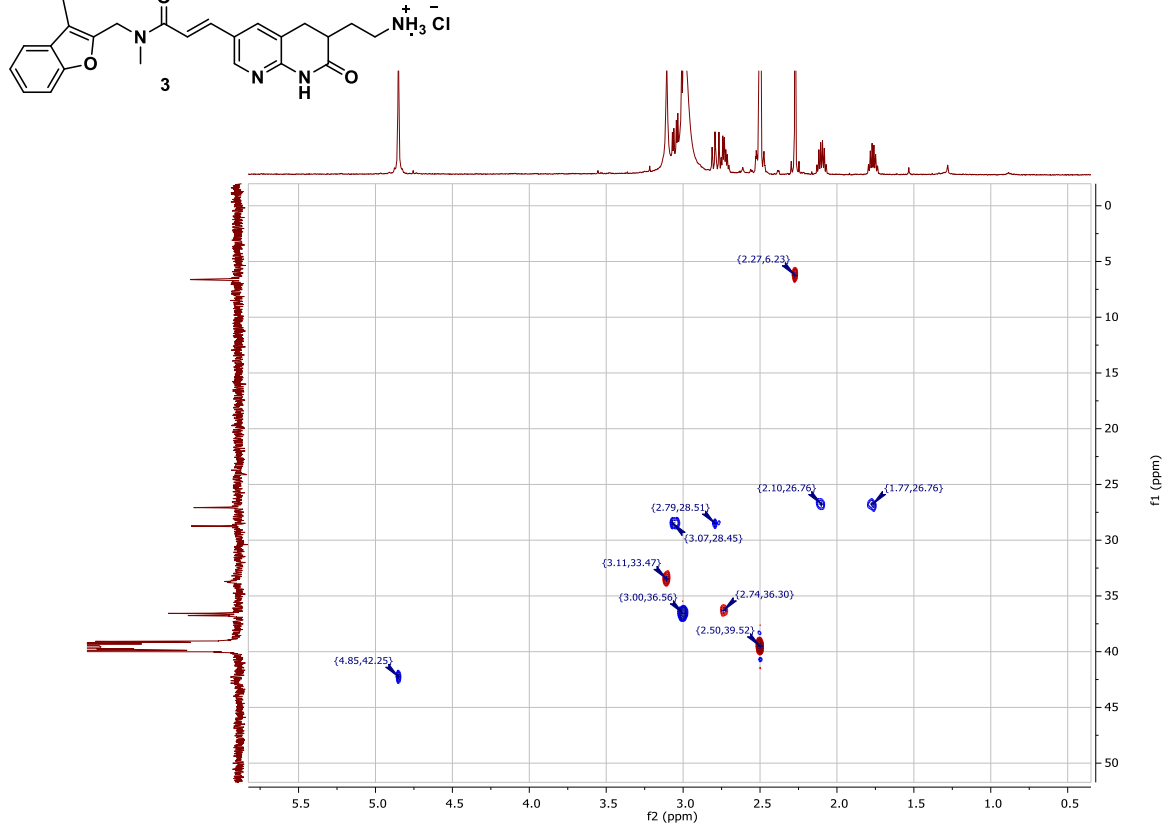

$^1\text{H}$  NMR (500 MHz, chloroform-*d*):

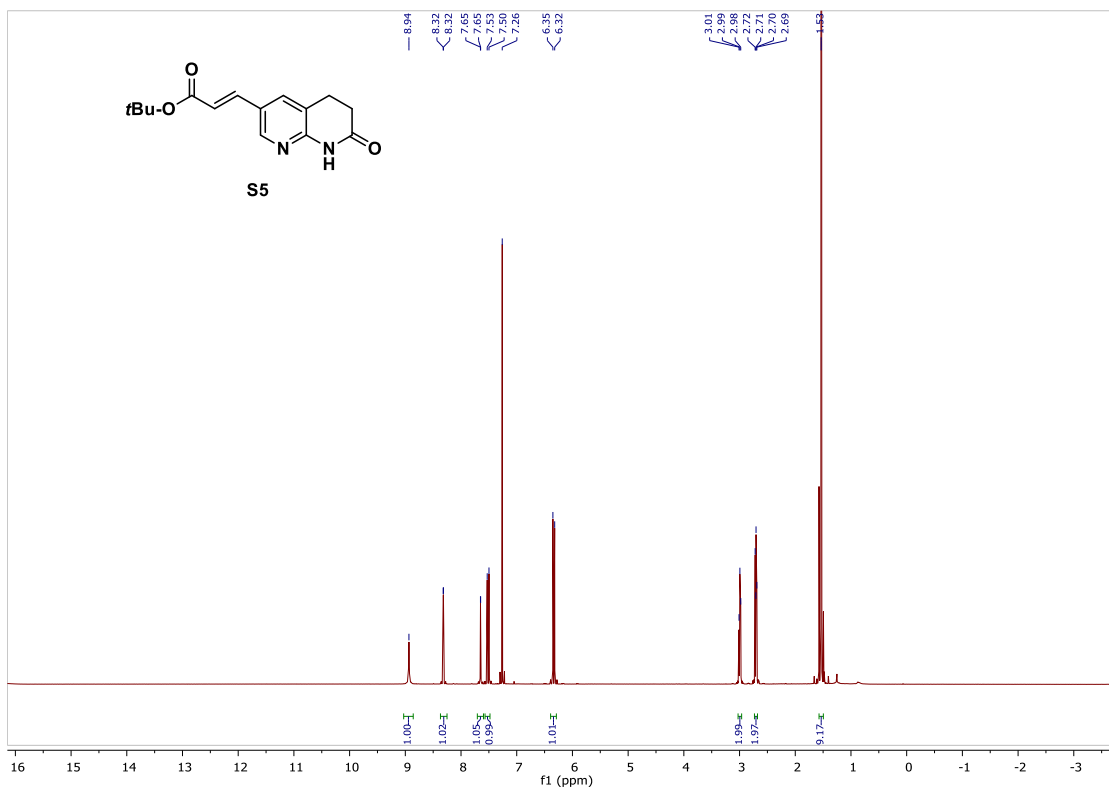

$^{13}\text{C}$  NMR (126 MHz, chloroform-*d*):

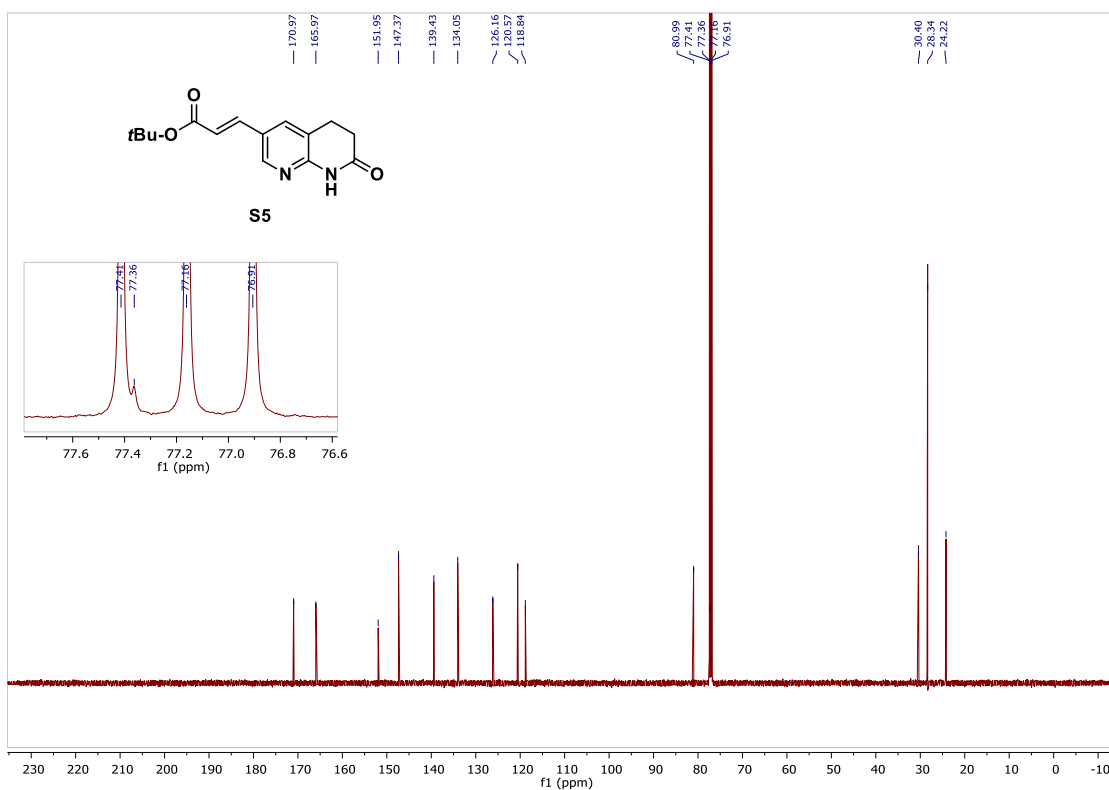

$^1\text{H}$  NMR (500 MHz,  $\text{DMSO-}d_6$ ):

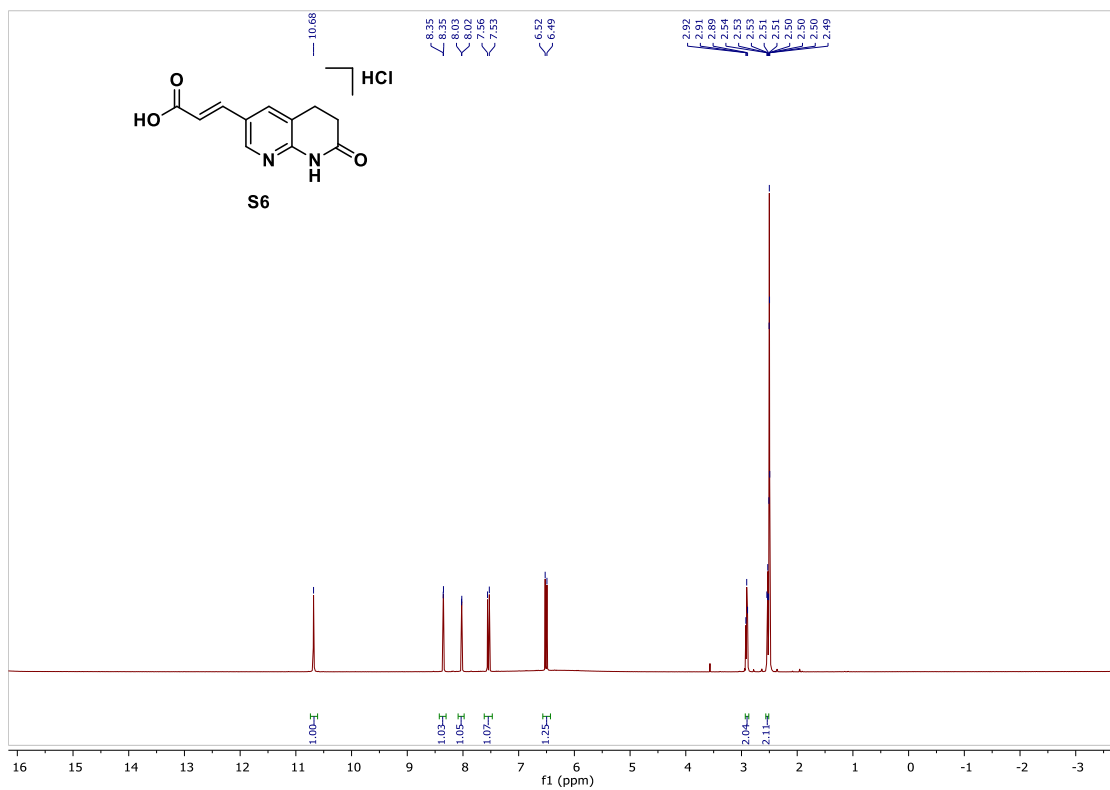

$^{13}\text{C}$  NMR (126 MHz,  $\text{DMSO-}d_6$ ):

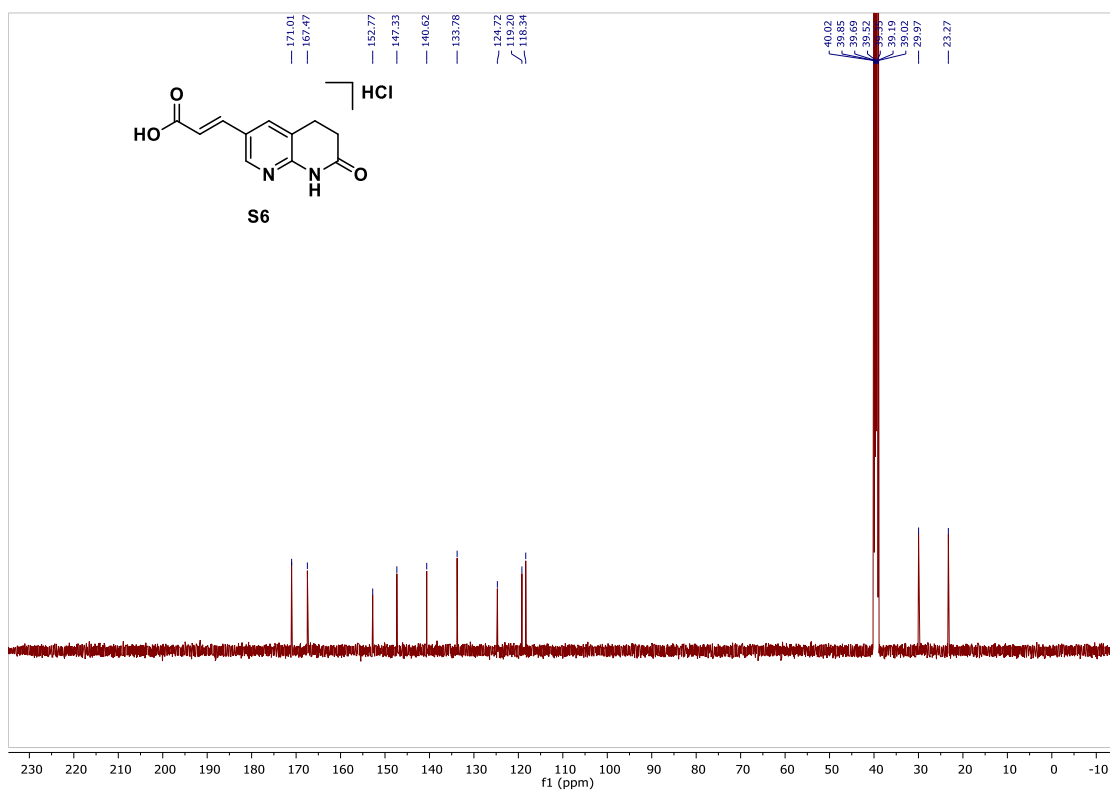

<sup>1</sup>H NMR (500 MHz, DMSO-d<sub>6</sub>):

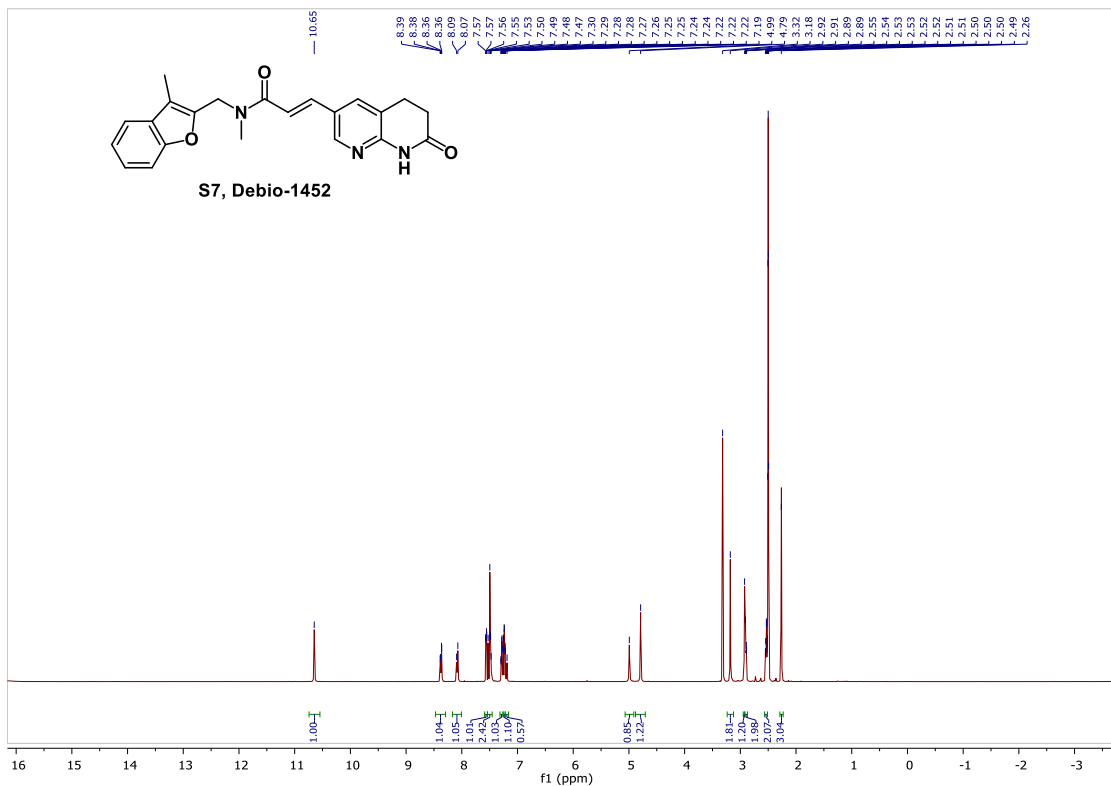

<sup>1</sup>H NMR (500 MHz, DMSO-d<sub>6</sub>):

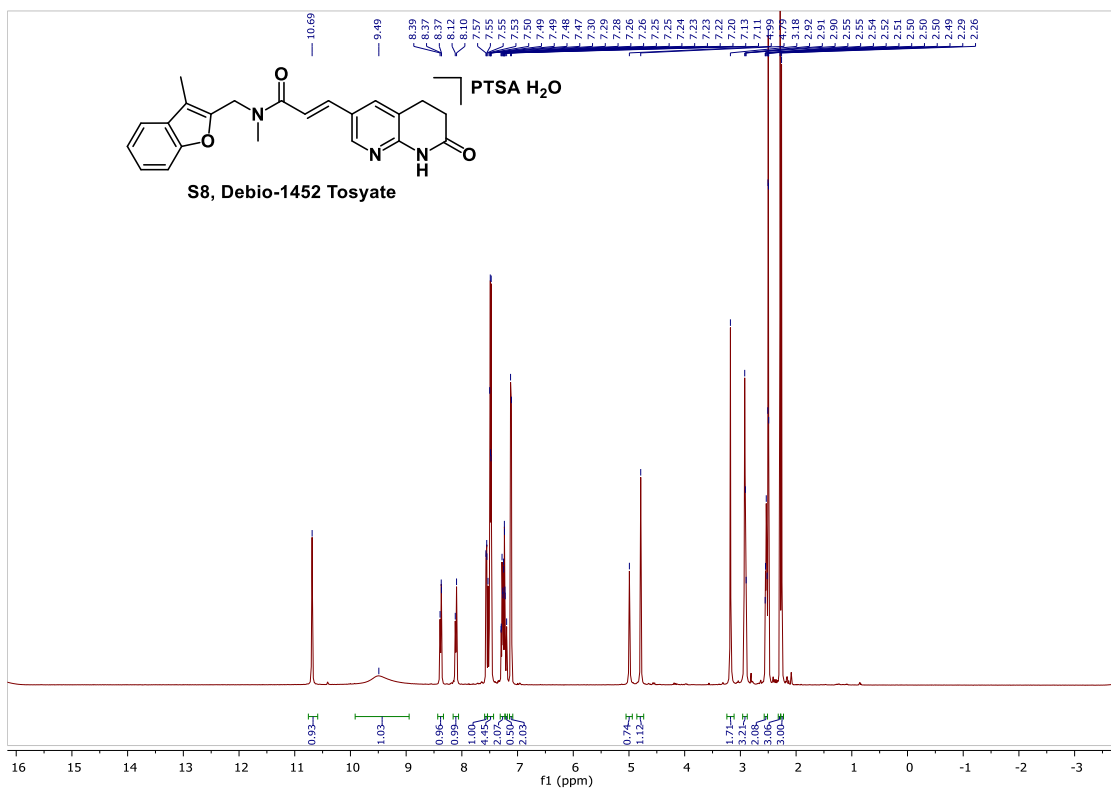



## References:

- 1 Fulmer, G. R. *et al.* NMR Chemical Shifts of Trace Impurities: Common Laboratory Solvents, Organics, and Gases in Deuterated Solvents Relevant to the Organometallic Chemist. *Organometallics* **29**, 2176-2179, doi:10.1021/om100106e (2010).
- 2 Simpson, G. L. *et al.* Glycosylated foldamers to probe the carbohydrate-carbohydrate interaction. *J. Am. Chem. Soc.* **128**, 10638-10639, doi:10.1021/ja0614565 (2006).
- 3 Jansen, M. *et al.* Synthesis of GABAA receptor agonists and evaluation of their alpha-subunit selectivity and orientation in the GABA binding site. *J. Med. Chem.* **51**, 4430-4448, doi:10.1021/jm701562x (2008).
- 4 Weitman, M. *et al.* Structure--activity relationship studies of 1-(4-chloro-2,5-dimethoxyphenyl)-3-(3-propoxypropyl)thiourea, a non-nucleoside reverse transcriptase inhibitor of human immunodeficiency virus type-1. *Eur. J. Med. Chem.* **46**, 447-467, doi:10.1016/j.ejmech.2010.11.003 (2011).
- 5 Gerusz, V. E., Sonia; Oxoby, Mayalen; Denis, Alexis. Novel heterocyclic acrylamides and their use as pharmaceuticals. US patent 8,846,711 B2 (2012).
- 6 Pauls, H. & Ramnauth, J. Salt, Prodrugs and Polymorphs of FabI Inhibitors. US patent 8,263,613 B2 (2012).
- 7 Berman, J. M. *et al.* Heterocyclic Compounds, Methods of Making Them and Their Use in Therapy. US patent 7,790,709 B2 (2010).
- 8 Seefeld, M. A. *et al.* Indole naphthyridinones as inhibitors of bacterial enoyl-ACP reductases FabI and FabK. *J. Med. Chem.* **46**, 1627-1635, doi:10.1021/jm0204035 (2003).
